## **Examining the status of improved air quality due to COVID-19 lockdown and an associated reduction in anthropogenic emissions**

**Srikanta Sannigrahi<sup>a\*</sup>, Anna Molter<sup>a, b</sup>, Prashant Kumar<sup>c, d</sup>, Qi Zhang<sup>e</sup>, Bidroha Basu<sup>a</sup>, Arunima Sarkar Basu<sup>a</sup>, Francesco Pilla<sup>a</sup>**

<sup>a</sup> School of Architecture, Planning and Environmental Policy, University College Dublin Richview, Clonskeagh, Dublin, D14 E099, Ireland.

<sup>b</sup> Department of Geography, School of Environment, Education and Development, The University of Manchester.

<sup>c</sup> Global Centre for Clean Air Research (GCARE), Department of Civil and Environmental Engineering, Faculty of Engineering and Physical Sciences, University of Surrey, Guildford GU2 7XH, United Kingdom

<sup>d</sup> Department of Civil, Structural & Environmental Engineering, Trinity College Dublin, Dublin, Ireland

<sup>e</sup> Frederick S. Pardee Center for the Study of the Longer-Range Future, Frederick S. Pardee School of Global Studies, Boston University, Boston, MA 02215, USA

\*Corresponding author: **Srikanta Sannigrahi**

E-mail: (Srikanta Sannigrahi\*) : [srikanta.sannigrahi@ucd.ie](mailto:srikanta.sannigrahi@ucd.ie)

# 1 **Examining the status of improved air quality due to COVID-19 lockdown and an** 2 **associated reduction in anthropogenic emissions**

3

## 4 **Abstract**

5 Clean air is a fundamental necessity for human health and well-being. The COVID-19  
6 lockdown worldwide resulted in controls on anthropogenic emission that have a significant  
7 synergistic effect on air quality ecosystem services (ESs). This study utilised both satellite and  
8 surface monitored measurements to estimate air pollution for 20 cities across the world.  
9 Sentinel-5 Precursor TROPospheric Monitoring Instrument (TROPOMI) data were used for  
10 evaluating tropospheric air quality status during the lockdown period. Surface measurement  
11 data were retrieved from the Environmental Protection Agency (EPA, USA) for a more explicit  
12 assessment of air quality ESs. Google Earth Engine TROPOMI application was utilised for a  
13 time series assessment of air pollution during the lockdown (1 Feb to 11 May 2020) compared  
14 with the lockdown equivalent periods (1 Feb to 11 May 2019). The economic valuation for air  
15 pollution reduction services was measured using two approaches: (1) median externality value  
16 coefficient approach; and (2) public health burden approach. Human mobility data from Apple  
17 (for city-scale) and Google (for country scale) was used for examining the connection between  
18 human interferences on air quality ESs. Using satellite data, the spatial and temporal  
19 concentration of four major pollutants such as nitrogen dioxide (NO<sub>2</sub>), sulfur dioxide (SO<sub>2</sub>),  
20 carbon monoxide (CO) and the aerosol index (AI) were measured. For NO<sub>2</sub>, the highest  
21 reduction was found in Paris (46%), followed by Detroit (40%), Milan (37%), Turin (37%),  
22 Frankfurt (36%), Philadelphia (34%), London (34%), and Madrid (34%), respectively. At the  
23 same time, a comparably lower reduction of NO<sub>2</sub> is observed in Los Angeles (11%), Sao Paulo  
24 (17%), Antwerp (24%), Tehran (25%), and Rotterdam (27%), during the lockdown period.  
25 Using the adjusted value coefficients, the economic value of the air quality ESs was calculated  
26 for different pollutants. Using the public health burden valuation method, the highest economic  
27 benefits due to the reduced anthropogenic emission (for NO<sub>2</sub>) was estimated in US\$ for New  
28 York (501M \$), followed by London (375M \$), Chicago (137M \$), Paris (124M \$), Madrid  
29 (90M \$), Philadelphia (89M \$), Milan (78M \$), Cologne (67M \$), Los Angeles (67M \$),  
30 Frankfurt (52M \$), Turin (45M \$), Detroit (43M \$), Barcelona (41M \$), Sao Paulo (40M \$),  
31 Tehran (37M \$), Denver (30M \$), Antwerp (16M \$), Utrecht (14 million \$), Brussels (9 million  
32 \$), Rotterdam (9 million \$), respectively. In this study, the public health burden and median  
33 externality valuation approaches were adopted for the economic valuation and subsequent  
34 interpretation. This one dimension and linear valuation may not be able to track the overall  
35 economic impact of air pollution on human welfare. Therefore, research that broadens the  
36 scope of valuation in environmental capitals needs to be initiated for exploring the importance  
37 of proper monetary valuation in natural capital accounting.

38 **Keywords:** *Air pollution; Google Earth Engine; Ecosystem services; COVID-19; lockdown;*  
39 *Human mobility; Natural capital; TROPOMI*

40

## 41 1. Introduction

42 As per the Ecosystem Services (ESs) definition of Millennium Ecosystem Assessment  
43 (MA, 2005), provision of clean air is one of the fundamental needs of human lives, which  
44 mainly comes from natural vegetation and appropriates by human interferences (Schirpke et  
45 al., 2014; Ash et al., 2010; Charles et al., 2020; Baró et al., 2014). The accelerated increases of  
46 air pollution across the world that mainly comes from transport emissions, industrial emission,  
47 domestic emission, and waste incineration is the primary reason for the degrading status of air  
48 quality ecosystem services. The high concentration of air pollutants, including nitrogen dioxide  
49 (NO<sub>2</sub>), carbon monoxide (CO), particulate matter (PM<sub>2.5</sub> and PM<sub>10</sub>), sulfur dioxide (SO<sub>2</sub>),  
50 which goes beyond the normal absorption capacity by the green canopy, leading to a paramount  
51 impact on the quality of human life (Nowak, 1994; Escobedo et al., 2008; De Carvalho and  
52 Szlafsztein, 2019; Gómez-Baggethun and Barton, 2013). The COVID-19 pandemic and its  
53 associated restriction on human activities cut down the pollution level drastically across the  
54 scale (Kumar et al., 2020a,b; Mahato et al., 2020). Many scholarly works appear on time to  
55 discuss the positive effect of COVID-19 lockdown on air quality (Venter et al., 2020, Kumar  
56 et al., 2020a; Ogen, 2020; Sasidharan et al., 2020; Sharma et al., 2020). However, a thorough  
57 evaluation is needed to measure the synergistic effects of these interventions on air quality  
58 ecosystem services.

59 Air pollution has been reduced drastically due to COVID-19 led lockdown and its  
60 resultant restrictions on human activities. Venter et al. (2020) had examined both tropospheric  
61 and ground air pollution levels using satellite data and a network of >10,000 air quality stations  
62 across the world and found that 29% reduction of NO<sub>2</sub> (with 95% confidence interval -44% to  
63 -13%), 11% reduction of Ozone (O<sub>3</sub>), and 9% reduction of PM<sub>2.5</sub> during the first two weeks of  
64 lockdown (Venter et al., 2020). Kerimray et al. (2020) study at Almaty, Kazakhstan, found that  
65 the effect of city-scale lockdown, which was effective on March 19, 2020, has resulted in 21%  
66 reduction of PM<sub>2.5</sub> with spatial variation of 6 – 34%. The CO (49% reduction) and NO<sub>2</sub> (35%  
67 reduction) concentration has also been reduced substantially. In the same period, an increase  
68 (15%) in O<sub>3</sub> levels is also observed in Almaty, Kazakhstan (Kerimray et al., 2020). Mahato et  
69 al. (2020) had reported a sharp reduction in air pollution in Delhi, one of the most polluted  
70 cities in the world. The author found that the concentration of PM<sub>10</sub> and PM<sub>2.5</sub> in Delhi was  
71 reduced to 60% and 39%, compared to the air pollution levels in 2019 (considered the  
72 lockdown period only). The concentration of other pollutants, such as NO<sub>2</sub> (-52.68%) and CO  
73 (-30.35%), have also been reduced substantially during the lockdown period. In addition to  
74 this, Mahato et al. study has observed a 40% to 50% improvement in air quality in Delhi within  
75 the first week of lockdown. Bao and Zhang, (2020) study combined air pollution and Intracity  
76 Migration Index (IMI) data for 44 cities in northern China and found that restriction on human  
77 mobility is strongly associated with the reduction of air pollution in these cities. The author  
78 found that the air quality index (AQI) in these cities is decreased by 7.80%, as the concentration  
79 of five key air pollutants, i.e., SO<sub>2</sub>, PM<sub>2.5</sub>, PM<sub>10</sub>, NO<sub>2</sub>, and CO have decreased by 6.76%,  
80 5.93%, 13.66%, 24.67%, and 4.58%, respectively. Sicard et al., (2020) had observed that due  
81 to lockdown and resulted in the restriction on human activities, NO<sub>2</sub> mean concentrations were  
82 reduced substantially in all European cities, which was ~53% at urban stations. During the  
83 same period, the mean concentrations of O<sub>3</sub> was reported to be increased at the urban stations  
84 in Europe, i.e., 24% increases in Nice, 14% increases in Rome, 27% increases in Turin, 2.4%  
85 increases in Valencia and 36% in increases in Wuhan (China). Otmani et al., (2020) study at

86 Morocco using three-dimensional air mass backward trajectories and HYSPLIT model found  
87 that PM<sub>10</sub>, SO<sub>2</sub>, and NO<sub>2</sub> are reduced up to 75%, 49%, and 96% during the lockdown period.  
88 In the southeast Asian (SEA) countries, (Kanniah et al., 2020) study found that PM<sub>10</sub>, PM<sub>2.5</sub>,  
89 NO<sub>2</sub>, SO<sub>2</sub>, and CO concentrations have been decreased by 26–31%, 23–32%, 63–64%, 9–20%,  
90 and 25–31% during the lockdown period in Malaysia. Kumar et al., (2020a) examined the  
91 impacts of COVID-19 mitigation measures on the reduction of PM<sub>2.5</sub> in five Indian cities  
92 (Chennai, Delhi, Hyderabad, Kolkata, and Mumbai), using in-situ measurements from 2015 to  
93 2020. Kumar et al. study found that during the lockdown period (25 March to 11 May), the  
94 PM<sub>2.5</sub> concentration in the selected cities has been reduced by 19 to 43% (Chennai), 41–53%  
95 (Delhi), 26–54% (Hyderabad), 24–36% (Kolkata), and 10–39% (Mumbai), respectively. This  
96 study also found that cities with higher traffic volume exhibited a greater reduction of PM<sub>2.5</sub>.

97 The level of air pollution has a severe impact on human health and overall well-being.  
98 Air pollution is responsible for nearly 5 million deaths each year globally (IHME, 2020). In  
99 2017, air pollution had contributed to 9% of deaths, ranges from 2% in the high developed  
100 country to a maximum 15% in low-developed countries, especially in South and East Asia  
101 (IHME, 2020). Based on Disability-Adjusted Life Years (DALYs) statistics, which  
102 demonstrate of losing one year of good health due to either premature mortality or disability  
103 caused by any factors, it has been estimated that air pollution is the 5<sup>th</sup> largest contributor to  
104 overall disease burden, only after high blood pressure, smoking, high blood sugar, and obesity,  
105 respectively. The adverse impact of air pollution on human health is not only limited to  
106 (low)developing countries. In the European regions, nearly 193,000 deaths in 2012 were  
107 attributed to airborne particulate matter (Ortiz et al., 2017). In addition, it has been found that  
108 air pollution in China is accountable for 4000 deaths each day, i.e., 1.6 million casualties in  
109 2016 (Rohde and Muller, 2015; Wang and Hao, 2012). By looking at the adverse effects of air  
110 pollution on COVID-19 counts, Chen et al., (2020) found that reduction in PM<sub>2.5</sub> during the  
111 lockdown period helped to avoid a total of 3214 PM<sub>2.5</sub> related deaths (95% CI 2340–4087).  
112 Chen et al., (2020) also estimated that COVID-19 lockdown and resulted cut down of air  
113 pollution brought multi-faceted health benefits to non-COVID mortalities. Several research  
114 studies (He et al., 2020; L. et al., 2015; Dutheil et al., 2020a) have echoed the surmountable  
115 effects of air pollutants on human lives and found that an increase in 10µg m<sup>-3</sup> of NO<sub>2</sub> per day  
116 will be responsible for a 0.13% increases of all-cause mortality (He et al., 2020). The mortality  
117 rate would be around 2% when the 5-day NO<sub>2</sub> level would reach 10µg m<sup>-3</sup> (Monica et al., 2011).  
118 In addition to this, L. et al. (2015) estimated that the increase in 8.1 ppb in NO<sub>2</sub> is attributed to  
119 1.052 increases in global hazard ratio related to air pollution.

120 Ecosystem Services (ESs) are the supports and benefits (*provisioning*, such as food and  
121 water; *regulating* such as management of floods, drought, land degradation, and disease;  
122 supporting such as soil formation and nutrient cycling; and *cultural* such as recreational,  
123 spiritual, religious and other non-material) that humans have free access from natural  
124 environment and ecosystems, which adds to human well-being (Fisher et al., 2009; Costanza  
125 et al., 1997; Braat and de Groot, 2012; Sannigrahi et al., 2018; Sannigrahi et al., 2019). The  
126 ecosystem service value (ESV) is a comprehensive assessment and has proven to be an  
127 alternative appraisal between environment and human development for sustainable natural  
128 resource management (Braat and de Groot, 2012; Potschin and Haines-Young, 2013; Pandeya  
129 et al., 2016; Sannigrahi et al., 2020c; Sannigrahi et al., 2020b; Adekola et al., 2015). The  
130 growing importance of ESs helps in adjusting the cost-benefit analysis by evaluating both the

131 negative and positive effects of human interferences on the natural environment and  
132 ecosystems. Considering the plausible application of ecosystem service valuation in different  
133 strata of planning, priorities should be given to developing a suitable valuation framework for  
134 estimating the biophysical and economic values of the key ESs (Bastian et al., 2013; Burkhard  
135 et al., 2014; Spangenberg et al., 2014; Affek and Kowalska, 2017; Sannigrahi et al., 2019). Due  
136 to unawareness about the importance of ESs on natural capital formation and human well-  
137 being, the ecosystem service valuation research was neglected for an extended period (Jack  
138 et al., 2008). To overcome this, several national and international valuation framework were  
139 formed, including The Economics of Ecosystems and Biodiversity (TEEB), The Inter-  
140 governmental Science-Policy Platform on Biodiversity and Ecosystem Services (IPBES),  
141 Millennium Ecosystem Assessment (MA 2005), Ecosystem Service Partnership (ESP) to name  
142 a few (Burkhard et al., 2009; Costanza et al., 2014; Comberti et al., 2015).

143 It is now well-established by many data-driven experiments that the accelerated rate of  
144 air pollution can have a substantial impact on overall human well-being. Due to this pandemic,  
145 the world witnessed an extraordinary transformation in all strata of lives, such as adopting  
146 digital alternatives to carry out the routine life and imposing national scale lockdown to restrict  
147 human mobility and social activity, to prevent the spread of infection. Additionally, as it is  
148 observed by many studies across the scale, the long term restriction on human mobility resulted  
149 in the reduction of road traffic, which improved the air quality status of a region. The  
150 importance of this human-induced reduction of air pollution needs to be evaluated in a way so  
151 that the same could be used as a reference for future decision making and policy formation.  
152 The present research thus made an effort to investigate the human impact on the natural  
153 environment by taking COVID-19 lockdown and its resultant effects of air pollution as a case  
154 for the experiment. The economic valuation was carried out to assess the synergistic effect of  
155 this pandemic on air pollutions at 20 cities across the world. The main objectives of this study  
156 are: (1) to estimate the spatiotemporal changes in air pollution during 1 February to 11 May in  
157 2019 and 2020 using both satellite and ground monitoring data; (2) to estimate the air quality  
158 ecosystem service using multiple economic valuation approaches; (3) to evaluate the  
159 association between human mobility and reduction of air pollution.

160

## 161 **2. Materials and methods**

### 162 *2.1 Data source and data preparation*

163 A total of 20 cities have been selected for evaluating the effect of lockdown on air  
164 quality ESs. These cities are Antwerp, Barcelona, Brussels, Chicago, Cologne, Denver,  
165 Frankfurt, London, Los Angeles, Madrid, Milan, New York, Paris, Philadelphia, Rotterdam,  
166 Sao Paulo, Tehran, Turin, and Utrecht. These cities have been considered based on two criteria:  
167 high air pollution and high COVID-19 casualties. Most of the cities listed here are from  
168 European and American countries. These countries reported more COVID-19 casualties  
169 compared with the Asian and Latin American countries (as of 11 May 2020) (WHO, 2020;  
170 Sannigrahi et al., 2020a). Sentinel 5P time series pollution data were also used to identify the  
171 most polluted cities. Both satellite and ground air pollution data were utilised for evaluating  
172 the positive effects of lockdown on the air quality index of these cities. For comparison, the  
173 satellite-based air pollution was measured from 01 February to 11 May for both 2019

174 (lockdown equivalent period) and 2020 (lockdown period). The concentration of four key air  
175 pollutants, nitrogen dioxide (NO<sub>2</sub>), sulfur dioxide (SO<sub>2</sub>), carbon monoxide (CO), and aerosol  
176 index (AI) concentration, was computed for both 2019 and 2020 using Sentinel 5P data. For  
177 six cities, i.e., Chicago, Denver, Detroit, Los Angeles, New York, and Philadelphia, the ground  
178 monitored air pollution data was collected for a more explicit assessment of air quality ESs.  
179 However, the ground monitored data was not adequate for the spatial evaluation for most of  
180 the cities considered in this study. Therefore, the in-situ data was only used for time series  
181 assessment of air pollutions, and the satellite measured pollution estimates were utilised for the  
182 spatially explicit appraisal and economic valuation. Human mobility data, including driving  
183 and transit for the selected cities, were collected from [Apple](#) (for city-scale) and [Google](#) (for  
184 country scale) mobility reports. In addition to this, the gridded human settlement data and  
185 population density data (pixel format) were collected from the Socio-Economic Data  
186 Application Center, National Aeronautics and Space Application data center ([SEDAC](#),  
187 [NASA](#)). For evaluating the total air pollution reduction of these 20 cities in a more accurate  
188 way, the Geographical Information System (GIS) enabled city boundary (shapefile format) was  
189 extracted from the OpenStreetMap (OSM) application. Two consecutive steps were followed  
190 to get the boundary of these cities. First, the OSM relation identifier number (OSM id) was  
191 generated for all the 20 cities using Nominatim, a search engine for OpenStreetMap data. Then,  
192 the OSM relation id of each city was ingested in the OSM polygon creation application  
193 interface, which generates the geometry (both actual and simplified) of the relation id in poly,  
194 GeoJSON, WKT or image formats. The formatted image geometry of the cities was then  
195 imported in ArcGIS Pro software, and the city boundary was extracted using an automatic  
196 digitisation function.

197

## 198 *2.3 Estimation of air pollution*

### 199 *2.3.1 Sentinel 5P TROPOMI data and TROPOMI Explorer Application*

200 The ESA (European Space Agency) Sentinel-5 Precursor (S 5P) is an example of low  
201 earth Sun-synchronous Orbit (SSO) polar satellite that provides information of tropospheric air  
202 quality, climate dynamics and ozone layer concentration for the time period 2015–2022  
203 ([Veefkind et al., 2012](#)). The ESA led S 5P mission is one of the few missions that is intended  
204 to measure air and climatic variability from the space-borne application. The S 5P mission is  
205 associated with the Global Monitoring of the Environment and Security (GMES) space  
206 programme. The TROPOspheric Monitoring Instrument (TROPOMI) payload of S 5P mission  
207 was designed to measure the tropospheric concentration of few key air pollutants, i.e., ozone  
208 (O<sub>3</sub>), NO<sub>2</sub>, SO<sub>2</sub>, CO, CH<sub>4</sub>, CH<sub>2</sub>O and aerosol properties in line with Ozone Monitoring  
209 Instrument (OMI) and SCanning Imaging Absorption spectroMeter for Atmospheric  
210 CartographY (SCIAMACHY) programme ([Veefkind et al., 2012](#)). TROPOMI measures the  
211 concentration of key tropospheric constituents at  $7 \times 7$  km<sup>2</sup> spatial unit. This default spatial  
212 scale was downscaled into 1km  $\times$  1km scale for city-scale analysis and subsequent  
213 interpretation. In this study, the spatial and temporal variability of four key air pollutants was  
214 extracted and mapped from the TROPOMI measurements using the Google Earth Engine cloud  
215 platform. For this purpose, an interactive application called [TROPOMI Explorer App](#),  
216 developed by Google developers teams ([Google, 2020](#); [Braaten, 2020](#)), was utilised to facilitate  
217 quick and easy S5P data exploration and to examine the changes in air pollution in both cross-

218 sectional and longitudinal way. Spatial visualisation and time series charts for the selected air  
219 pollutants were also prepared with the help of this TROPOMI Explorer application. The other  
220 accessories of this application, such as NO<sub>2</sub> time series inspector, NO<sub>2</sub> temporal comparison,  
221 NO<sub>2</sub> time-series animation, were also utilised for different computational purposes.

### 222 2.3.2 Ground pollution data

223 Ground monitored air quality data was available only for a few cities considered in the  
224 study, including Chicago, Denver, Detroit, Los Angeles, New York, and Philadelphia. Thus,  
225 these cities were selected for the ground data-driven analysis. Ground monitored data for these  
226 cities were collected from the U.S. Environmental Protection Agency (US EPA). This data is  
227 available for a daily scale and for six key pollutants, such as CO, NO<sub>2</sub>, O<sub>3</sub>, PM<sub>2.5</sub>, PM<sub>10</sub>, and  
228 SO<sub>2</sub>, respectively. The in-situ air pollution concentration at a daily scale was considered only  
229 for the time series assessment of pollution concentration. Additionally, the said in-situ data had  
230 not been used for any validation and calibration of satellite pollution estimates. The time series  
231 (2000–2020) air quality index (AQI) of these selected cities were also generated using the  
232 multilayer time plot function. The overall AQI values were sub-divided into six groups, i.e.,  
233 good, moderate, unhealthy for sensitive population groups, unhealthy, very unhealthy, and  
234 hazardous, respectively. In addition to this, the single year AQI data was also extracted for the  
235 selected cities from the EPA. The number of unhealthy days for each pollutant was measured  
236 using the EPA AQI plot function. The combination of two different pollutants, such as CO and  
237 NO<sub>2</sub>, PM<sub>10</sub> and PM<sub>2.5</sub>, was permuted to assess the yearly AQI status of the cities. As several  
238 studies reported the increment of O<sub>3</sub> due to the reduction of GHG emissions, this study also  
239 evaluated the O<sub>3</sub> exceedances for the current year compared to the average O<sub>3</sub> concentration  
240 of the last 5 and 20 years. This particular task was implemented using the EPA Ozone  
241 exceedances plot function (EPA, 2020). **Table. S1** provides the criteria of categorisation for  
242 each index.

243

### 244 *2.4 Environmental significance of improving air quality status*

245 The accelerating increases of air pollution in cities is a major concern across the world  
246 (Chan and Yao, 2008; Kim Oanh et al., 2006; Mayer, 1999; Guttikunda et al., 2014; Abhijith  
247 et al., 2017; Rai et al., 2017; Pilla and Broderick, 2015). Various policies have been  
248 implemented for managing the city-based air pollution that mainly originated from  
249 anthropogenic activities from specific sources and sectors (Kumar et al., 2015; Kumar et al.,  
250 2016; Baró et al., 2014; Feng and Liao, 2016; Zhang et al., 2016). These include the Directive  
251 2010/75/EU on industrial emissions, initiated by European Commission to define “Euro  
252 standards” for measuring the road vehicle emissions and the Directive 94/63/EC for  
253 calculating volatile organic compounds emissions from petrol storage (Baro et al., 2014). The  
254 reduction of these gaseous pollutants by green canopy has significant economic importance  
255 (Kumar et al., 2019). Two main ecosystem services, such as air quality regulation and  
256 climate/gas regulation, are mainly associated with air quality ecosystem services. Several  
257 studies have calculated the economic values of NO<sub>2</sub>, SO<sub>2</sub>, CO reductions using various  
258 valuation approaches such as carbon tax, the social cost of carbon, shadow price method,  
259 marginal cost method, etc. (Guerrero et al., 2016; Castro et al., 2017; Jeanjean et al., 2017;  
260 Bherwani et al., 2020). In this study, multiple relevant approaches were adopted for calculating

261 the economic values of the NO<sub>2</sub>, SO<sub>2</sub>, CO, aerosol reduction to gauge the economic benefits of  
262 these functions. Since this study has considered the air pollution reduction at the city scale, the  
263 public health burden and mean externality valuation approaches were utilised for estimating  
264 economic damage due to air pollution and to calculate the economic values of air quality  
265 services (Baro et al., 2014; Matthews and Lave, 2000). Unit social damage price due to air  
266 pollution was estimated for 2020 using the U.S consumer price index (CPI) inflation calculator  
267 (U.S Bureau of Labor Statistics, 2020). Additionally, using the most updated price conversion  
268 factors, the mean externality values for the key pollutants was estimated as: CO = 956 \$ t<sup>-1</sup>,  
269 NO<sub>x</sub> = 5149 \$ t<sup>-1</sup>, SO<sub>2</sub> = 3678 \$ t<sup>-1</sup>, PM<sub>10</sub> = 7907 \$ t<sup>-1</sup>.

270 The public health burden valuation approach has also been utilised for economic  
271 valuation of air quality ESs (Kumar et al., 2020a, Etchie et al. 2018; Hu et al., 2015; Sharma et  
272 al., 2020; Sahu and Kota, 2017; COMEAP, 2009). The calculation of public health burden and  
273 the associated economic burden was conducted by three subsequent steps: first, estimation of  
274 population-weighted average concentration; second, estimation of health burden or a number  
275 of premature mortality attributable to air pollution; and third, the economic burden due to  
276 excess air pollution and economic benefits subject to the reduction of air pollution levels during  
277 the lockdown period. The population-weighted average concentration (PWAC) was measured  
278 as follows:

$$279 \quad PWAC = \frac{\sum_x (Pop_x \times C_x)}{\sum_x Pop_x}$$

280 Where  $Pop_x$  is the population count of a pixel,  $C_x$  is the average pollution concentration (1 Feb  
281 to 11 May 2020),  $\sum_x Pop_x$  is the total population count of the city,  $PWAC$  is the population-  
282 weighted average concentration. The  $PWAC$  was estimated using ArcPy Python module.  
283 Gridded population data from SEDAC, NASA, was utilised for this task. Pollution and gridded  
284 population data for the same time period were used for estimations of  $PWAC$ .

285 Following, the health burden (HB), which refers premature deaths attributable to short-  
286 term exposure to air pollutants was estimated for the study period (1 February to 11 May 2020).  
287 The reduction in health burden ( $\Delta HB$ ) was also measured by calculating the difference between  
288 the previous and later HB estimates.

$$289 \quad HB_x = AF \times B_x \times \sum_x Pop_x \quad (1)$$

$$290 \quad AF = \left( \frac{RR_x - 1}{RR_x} \right) \quad (2)$$

$$291 \quad \Delta HB = HB_{2019} - HB_{2020} \quad (3)$$

$$292 \quad RR_i = e \left[ \beta_i (C_i - C_{i,0}) \right], C_i > 0 \quad (4)$$

$$293 \quad ER = RR - 1 \quad (5)$$

294



295 Where  $HB_x$  is the health burden of city x,  $AF$  is the attributable fraction associated with the  
296 relative risk of each pollutant,  $RR_i$  is the relative risk of pollutant i,  $B_x$  is baseline cause-specific  
297 mortality rate per 100,000 population. For calculating  $B_x$ , country-wise cardiovascular and  
298 chronic respiratory baseline mortality rate was collected from Global Burden of Disease study  
299 of 2017 (IHME, 2020).  $Pop_x$  is the population of city x derived from the SEDAC, NASA  
300 gridded population count data.  $\Delta HB$  is the difference in health burden (or avoidance of  
301 premature death due to the reduction of air pollution) from 1<sup>st</sup> February to 11<sup>th</sup> May 2020  
302 compared to the same period in 2019.  $HB_{2019}$  and  $HB_{2020}$  is the health burden estimates in 2019  
303 and 2020 (estimated for 1 February to 11 May time period).  $\beta_i$  is the exposure-response  
304 relationship coefficient, indicates the excess risk of health burden (such as mortality) per unit  
305 increase of pollutants.  $\beta$  is calculated 0.038%, 0.032%, 0.081%, 0.13%, and 0.048% per 1  
306  $\mu g / m^3$  increases of PM<sub>2.5</sub>, PM<sub>10</sub>, SO<sub>2</sub>, NO<sub>2</sub>, and O<sub>3</sub>, respectively (Hu et al., 2015; Sharma et  
307 al., 2020, Kumar et al., 2020a; Chen et al., 2020).  $\beta$  is calculated 3.7% per 1 mg/m<sup>3</sup> increases  
308 of CO.  $C_i$  is the concentration of pollutant i,  $C_{i,0}$  is the threshold concentration, below which  
309 the pollutant exhibits no obvious adverse health effects (i.e., RR = 1).

310 The economic burden (EB) and economic benefits of the reduced air pollution  
311 concentration were estimated using the value of statistical life (VSL) approach (Etchie et al.  
312 2018; Hu et al., 2015). The VSL represents an individual's willingness to pay for a marginal  
313 reduction in risk of dying. The VSL method has been utilised as a standard approach for  
314 ecosystem service valuation of non-marketable commodities and is often used for cost-benefit  
315 analysis (OECD, 2014; WHO, 2015), ecosystem service studies (Zhang et al., 2018, 2020).  
316 The economic benefits due to avoided premature mortality were estimated as follows:

$$317 \quad EB_x = HB_x \times VSL_x \quad (6)$$

318 Where  $EB_x$  is the economic benefit attributed to the reduction of air pollution and resulted in  
319 estimates of avoidable mortality  $HB_x$ , health burden estimates of city x,  $VSL_x$  is the value of  
320 statistical life of the country x that corresponds to the city. Using the value transfer method,  
321 OECD (2016a) estimated the VSL for the entire world, after incorporating income elasticity  
322 beta of 1. Since this study considers cities that cover many diversified economic setup and  
323 development background, a uniform income elastic global VSL estimates measured by Viscusi  
324 et a., (2017) was considered for the economic valuation and subsequent analysis. As city-  
325 specific VSL data is not available for many cities, the VSL estimates for the corresponding  
326 countries were taken for the analysis. The 2017 VSL values were converted to 2020 unit price  
327 for adjusting price fluctuation. The income adjusted VSL was estimated as Belgium (8 \$  
328 millions, used this value for Antwerp and Brussels city), Spain (5 \$ millions, this value was  
329 used for Barcelona, Madrid), USA (10 \$ millions, this value was used for Chicago, Denver,  
330 Detroit, Los Angeles, New York, and Philadelphia), Germany (8 \$ millions, this was used value  
331 for Cologne, Frankfurt), UK (8 \$ millions, this value was used for London), Italy (6 \$ millions,  
332 this value was used for Milan and Turin), France (7 \$ millions, this value was used for Paris),  
333 Netherlands (9 \$ millions, this value was used for Rotterdam and Utrecht), Brazil (2 \$ millions,  
334 this value was used for Sao Paulo), and Iran (1 \$ millions, this value was used for Tehran),  
335 respectively (Viscusi et a., 2017) (Table S5).

## 336 2.5 *Examining human mobility and its connections with air pollution status*

337 Due to the emergence of COVID-19 pandemic, countries across the world imposed  
338 mandatory lockdowns to restrict human-mobility. This reduced motorised traffic, which is one  
339 of the key sources of urban air pollution (Chinazzi et al., 2020; De Brouwer et al., 2020).  
340 Human mobility could accelerate the transmission of contagious diseases, especially when a  
341 larger section of daily commuter uses public transport to maintain their essential daily journey  
342 (Sasidharan et al., 2020). Joy et al. and Lara et al. research highlighted a statistically significant  
343 association between human mobility that is mainly attributed to public transport and  
344 transmissions of acute respiratory infections (ARI) (Troko et al., 2011; Goscé and Johansson,  
345 2018). Joy et al. (2011) also found that the use of public transport during a pandemic outbreak  
346 in the UK has increased the risk of ARI infection by six-times. To evaluate the effects of  
347 reduced human mobility on air pollution, this study utilised the human mobility data provided  
348 by Apple and Google. Apple mobility data includes three mobility components, i.e., driving,  
349 walking, and transit (public transport), respectively. The reduction of human mobility during  
350 the lockdown period was calculated from the baseline (13 January). Both positive and negative  
351 changes in human mobility were recorded in percentage form to eliminate calculation bias and  
352 easy comparability across the cities/countries in the world. Among the three mobility  
353 components, driving and transit was considered for the evaluation, and walking was discarded  
354 from the analysis. Google mobility data was also used in this study which has six components  
355 (retail and recreation, grocery and pharmacy, parks, transits, workplace, and residential). This  
356 data is available from 15 February 2020 to recent date. Since Google mobility data is not  
357 available for city scale, the smallest scale (county/state) was taken for the analysis for which  
358 the mobility counts are available. This data is also prepared in percentage format to handle the  
359 calculation bias and better understanding of the data.

360

## 361 3. Results

### 362 3.1 *Spatial changes in air pollution in different cities due to lockdown*

363 Spatial distribution of four key air pollutants, i.e., NO<sub>2</sub> (Fig. 1) SO<sub>2</sub> (Fig. S1), CO (Fig.  
364 S2), and aerosol concentration (Fig. S3) is analysed for 20 cities across the world. The spatial  
365 distribution of these pollutants was measured from 1 February to May 11 in 2019 and 2020. A  
366 sharp reduction in NO<sub>2</sub> and CO emission is observed for all the cities. This could be due to the  
367 lockdown and resultant reduction of transportation and industrial emission. Among the 20  
368 cities, the maximum decrease of NO<sub>2</sub> concentration is recorded for the European cities, such  
369 as Paris, Milan, Madrid, Turin, London, Frankfurt, Cologne, and American cities, such as New  
370 York, Philadelphia, etc. (Fig. 1). Moreover, among the 20 cities, the highest NO<sub>2</sub> reduction is  
371 recorded in Tehran, and the lowest reduction is found in Los Angeles and Sao Paulo (based on  
372 1<sup>st</sup> Feb to 11<sup>th</sup> May pollution data). The SO<sub>2</sub> emission is evaluated and presented in Fig. S1.  
373 An incremental trend of SO<sub>2</sub> emission is observed during the study period. For most cities, SO<sub>2</sub>  
374 concentration was increased during the study period. However, for exceptions, a slight decrease  
375 in SO<sub>2</sub> emission is observed in Rotterdam, Frankfurt, London, and Detroit cities (Fig. S1). The  
376 spatial distribution of CO is also evaluated using GEE cloud application and Sentinel 5P data  
377 and presented in Fig. S2. The CO emission is reduced significantly in all the 20 cities. The  
378 highest reduction is recorded in Detroit, followed by Barcelona, London, Los Angeles, New

379 York, Philadelphia, Milan, Madrid, etc. (**Fig. 2**). At the same time, CO emission was increased  
380 in Cologne, Denver (**Fig. S2**). The spatial distribution of aerosol concentration is also  
381 calculated and presented in **Fig. S3**. Aerosol concentration is also found to be decreased during  
382 the COVID lockdown with restricted human activities.

### 383 *3.2 Temporal changes in air pollution due to lockdown*

384 **Fig. 2** and **Table. 1** shows the average NO<sub>2</sub>, SO<sub>2</sub>, CO, and aerosol concentration from  
385 1<sup>st</sup> Feb to 11<sup>th</sup> May in 2019 and 2020. Among the 20 cities, the average NO<sub>2</sub> concentration was  
386 found highest in Tehran (747.1μmol in 2019 and 563.77μmol in 2020), followed by Milan  
387 (257.34μmol in 2019 and 162.52μmol in 2020), New York (242.2μmol in 2019 and  
388 172.31μmol in 2020), Paris (205.95μmol in 2019 and 111.33μmol in 2020), Turin  
389 (204.94μmol in 2019 and 129.46μmol in 2020), Chicago (199.21μmol in 2019 and 139.27μmol  
390 in 2020), Cologne (194.25μmol in 2019 and 132.53μmol in 2020), Philadelphia (187.81μmol  
391 in 2019 and 123.11μmol in 2020), etc. Lowest NO<sub>2</sub> concentration was observed in Sao Paulo  
392 (119.88μmol in 2019 and 99.3μmol in 2020), Brussels (160.95μmol in 2019 and 115.96μmol  
393 in 2020), Denver (161.01μmol in 2019 and 107.19μmol in 2020), respectively. Among the 20  
394 cities, the SO<sub>2</sub> concentration was found maximum in Chicago (528.26μmol in 2019 and  
395 785.46μmol in 2020), followed by Detroit (465.96μmol in 2019 and 508.61μmol in 2020),  
396 Barcelona (429.21μmol in 2019 and 444.19μmol in 2020), Paris (427.99μmol in 2019 and  
397 484.62μmol in 2020), Philadelphia (422.32μmol in 2019 and 552.96μmol in 2020), London  
398 (415.89μmol in 2019 and 461.82μmol in 2020), etc. While the low SO<sub>2</sub> emission was  
399 documented in Sao Paulo (19.34μmol in 2019 and 105.23μmol in 2020), Denver (128.75μmol  
400 in 2019 and 249.18μmol in 2020), Brussels (227.32μmol in 2019 and 347.9μmol in 2020),  
401 Tehran (258.35μmol in 2019 and 258.3μmol in 2020), Los Angeles (264.3μmol in 2019 and  
402 397.61μmol in 2020) (**Fig. 2 and Table. 1**). The average concentration of CO in different cities  
403 is also evaluated and presented in **Fig. 2 and Table. 1**. During the study period, the highest CO  
404 concentration is recorded in American cities, i.e., New York, Philadelphia, Detroit, Chicago,  
405 Los Angeles, while a comparably low CO concentration is documented for Sao Paulo, Denver,  
406 Madrid, Barcelona, and Brussels (**Fig. 2**). Except for a few cities, the concentration of NO<sub>2</sub>,  
407 CO, and aerosol has been reduced substantially (**Fig. 3 and Table. 1, Table. 2**). For NO<sub>2</sub>, the  
408 highest reduction was detected in Paris (45.94%), followed by Detroit (40.29%), Milan  
409 (36.85%), Turin (36.83%), Frankfurt (36.36%), Philadelphia (34.45%), London (34.15%), and  
410 Madrid (34.03%), respectively. At the same time, comparably lower reduction of NO<sub>2</sub> is  
411 observed in Los Angeles (10.54%), Sao Paulo (17.17%), Antwerp (24.14%), Tehran (24.54%),  
412 and Rotterdam (26.72%), respectively (**Fig. 3 and Table. 2**). For CO, the maximum reduction  
413 was recorded for New York (4.24%), followed by Detroit (4.09%), Sao Paulo (3.88%),  
414 Philadelphia (3.45%), Milan (3.17%), Barcelona (2.86%), respectively. At the same time, a  
415 positive (increase) changes in CO were observed in Denver (1.92%), Cologne (0.49%), and  
416 Rotterdam (0.01%) (**Fig. 3 and Table. 2**). The temporal variability of NO<sub>2</sub>, SO<sub>2</sub>, CO, and  
417 aerosol concentration is shown in **Fig. 4, Fig. 5, Fig. S4, Fig. S5, Fig. S6, Fig. S7, Fig. S8**. Both  
418 median and interquartile range (IQR) values in **Fig. 4** and **Fig. 5** suggest that NO<sub>2</sub>  
419 concentration was decreased substantially. A similar declining pattern is observed for CO for  
420 all the 20 cities considered in this study (**Fig. S4, Fig. S5**). However, for SO<sub>2</sub>, an incremental  
421 trend was observed for most of the cities (**Fig. S6**).

422 Using the ground monitored data, the daily air quality index (AQI), and a cumulative  
423 number of good AQI days for the six American cities was computed and presented in **Fig. 6**.  
424 The ground monitored data for these six cities have been considered only for time series  
425 assessment and subsequent interpretation. In all cases, it has been found that AQI is reduced  
426 significantly due to lockdown led reduction in human mobility and traffic emission. In the left  
427 panel, the grey color indicates the five years average AQI and light blue shade demonstrating  
428 the average AQI range in the last 20 years. Based on the AQI ranges, four AQI classes were  
429 characterised, such as good, moderate, unhealthy for sensitive groups, and unhealthy (**Fig. 6**).  
430 A comparably higher cumulative number of good AQI days is recorded during the lockdown  
431 period for all five cities, except Chicago (**Fig. 6**). Using the EPA AQI interactive plot function  
432 application, the daily AQI of the US cities were analysed and presented in **Fig. 7, Fig. S9, Fig.**  
433 **S10**. The daily NO<sub>2</sub> and SO<sub>2</sub> AQI suggest that all the cities are benefitted by having good  
434 quality air due to anthropogenic pollution switch-off and restricted human mobility that  
435 collectively improved the air quality ecosystem services in these cities. The multi-year daily  
436 time series plot (**Fig. 8, Fig. 9, Fig. 10**) is also indicating the improving status of air quality in  
437 the US cities due to the reduced level of traffic emission. Six distinct color grade is used to  
438 demonstrate the AQI categories. Six different AQI classes, i.e., good, moderate, unhealthy for  
439 sensitive groups, unhealthy, very unhealthy, and hazardous, etc. are also defined to evaluate  
440 the time series AQI status of these cities during the pre-COVID (2000 – 2019) and lockdown  
441 (Jan to May 2020) period. **Fig. 8** shows that in all cities, the NO<sub>2</sub> AQI status is mostly good  
442 during the lockdown period compared to the long-term average AQI in these cities. **Fig. 9**  
443 shows the PM<sub>2.5</sub> AQI status, which also found improving during the lockdown period. The  
444 higher proportions of good AQI values in all the cities are suggesting improving air quality  
445 (PM<sub>2.5</sub>) status in Chicago, Denver, Detroit, Los Angeles, New York, and Philadelphia. The  
446 multi-year time series plot was prepared after combining all the pollutants that suggest that the  
447 air quality is improved substantially, which is supported by the lower AQI recorded during the  
448 lockdown period compared to the long-term AQI recorded in these cities. Among the six cities,  
449 the hazardous to very unhealthy air quality is common in Los Angeles, compared to the other  
450 five US cities considered in this study.

### 451 *3.3 Human mobility and its paramount effect in lowering the pollution levels*

452 Using both Google and Apple human mobility information, the effect of lockdown and  
453 its striking impact on human outdoor activities is measured and presented in **Fig. 11, Fig. S12,**  
454 **Fig. S13, Fig. S14, Fig. S15**. The driving and transit mobility was calculated using the Apple  
455 mobility data. Mobility on January 13 was taken as a baseline, and further changes in human  
456 mobility during the lockdown period was calculated from the baseline mobility. The driving  
457 counts reduced most significantly in Paris, followed by Madrid, London, Antwerp, and  
458 Brussels (**Fig. 11**). Whereas, such changes were comparably lower in Chicago, Cologne,  
459 Denver, Los Angeles, New York (**Fig. 11**). Transit counts also reduced significantly in Paris,  
460 followed by Utrecht, Sao Paulo, New York, Milan, Chicago, Antwerp, and Brussels (**Fig. 11**).  
461 Using the Google human mobility records, the changes in different mobility such as retail and  
462 recreation, grocery and pharmacy stores, transit, parks and outdoor, workplace visitor, and time  
463 spent at home were measured. Transport related mobilities were reduced most significantly in  
464 the Latin American countries, followed by a few Middle East and Southeast Asian countries,  
465 and American countries (**Fig. S13**). Parks and outdoor activities were found to be reduced  
466 maximum in the Latin American countries and South Asian countries. At the same time,

467 outdoor activities are seen to be increased in a few European countries as well (**Fig. S13**). The  
468 highest reduction in retail and recreation is found in India, Turkey, UK, and few Latin  
469 American countries due to lockdown and associated restrictive measures. (**Fig. S14**).  
470 Considering grocery and pharmacy-related mobilities, the highest reduction is being observed  
471 in the Latin American countries and a few European countries. Whereas grocery related  
472 mobility was found to be increased in the USA, few African and European countries (**Fig. S14**).  
473 Workplace related mobility is reduced significantly in Peru, Bolivia, India, Spain, Turkey,  
474 Saudi Arabia, USA, and Canada (**Fig. S15**). While such changes were positive in a few African  
475 countries (Mali, Niger, Mozambique, Zambia), Venezuela, and a few island countries (**Fig.**  
476 **S15**). Finally, using the Google real-time mobility information, another mobility component,  
477 i.e., time spent at home, was calculated (**Fig. S15**). As expected, due to lockdown and  
478 mandatory restrictive measures on human activities, people tend to spend more time at home,  
479 which also suggests that at most of the countries have taken timely decisions to control the  
480 pandemic. Except for a few European countries, peoples around the world limited their outdoor  
481 activities, which is supported by the results shown in **Fig. S15**.

### 482 *3.4 Improving the status of air quality ecosystem services*

483 Using both public health and externality valuation approaches, the positive association  
484 between lockdown led the reduction of anthropogenic emissions, and air quality ecosystem  
485 services are analysed and presented in **Table. 3, Table. 4, Table. 5, Table. S5**. Before  
486 economic valuation, the original externality values for different air pollutants were adjusted  
487 using the latest price inflation conversion factor (**Table. 3**). These adjusted value coefficients  
488 were later used to calculate the economic value of the air quality ecosystem services for the 20  
489 cities across the world. For the public health valuation method, the estimated economic burden  
490 and economic benefits were also adjusted for eliminating the influence of price inflation in the  
491 valuation. Overall, the per-unit EV was calculated maximum for Sao Paulo (49716 \$), New  
492 York (49453 \$), Tehran (43624 \$), London (38930 \$), Detroit (22588 \$), Los Angeles (20242  
493 \$), Philadelphia (19190 \$), Madrid (16413 \$), Chicago (13222 \$), Milan (10035 \$), Frankfurt  
494 (5854 \$), Turin (5749 \$), Antwerp (5039 \$), Paris (4971 \$), Barcelona (4117 \$), Cologne (3914  
495 \$), Rotterdam (3400 \$), Brussels (1876 \$), and Utrecht (1675 \$). At the same time, the  
496 economic burden (both NO<sub>2</sub> and CO emission is found higher than the previous year, 2019)  
497 due to NO<sub>2</sub> and CO emission was calculated for Denver (-1077 \$) (**Table. 4**).

498 The population-weighted average concentration (PWAC,  $\mu\text{mol m}^{-2}$ ) was estimated for  
499 each city and presented in **Fig. 12**. The highest PWAC values (in 2019) were estimated for  
500 Tehran (512), followed by Milan (183), New York (139), Chicago (139), Turin (139),  
501 Philadelphia (134), Los Angeles (133), Madrid (133), Paris (133), Detroit (127), Cologne  
502 (126), London (125), Frankfurt (122), respectively. Using the public health burden valuation  
503 approach, the highest economic values (derived from public health burden valuation approach  
504 and estimated for 101 days) was estimated for New York (501M \$), followed by London (375  
505 M \$), Chicago (137M \$), Paris (124M \$), Madrid (90M \$), Philadelphia (89M \$), Milan (78  
506 M \$), Cologne (67M \$), Los Angeles (67M \$), Frankfurt (52M \$), Turin (45M \$), Detroit (43  
507 M \$), Barcelona (41M \$), Sao Paulo (40M \$), Tehran (37M \$), Denver (30M \$), Antwerp (16  
508 M \$), Utrecht (14M \$), Brussels (9M \$), and Rotterdam (9M \$), respectively (**Table. 5**). It is  
509 also evident from the economic valuation that due to the temporary reduction of air pollution

510 levels, the economic cost attributed to air pollution led health burdens was reduced significantly  
511 (Table. S5).

## 512 **4. Discussion**

### 513 *4.1 Relevance of satellite remote sensing in air pollution mapping*

514 Using the ESA Sentinel 5P TROPOMI air real-time pollution data, the spatiotemporal  
515 concentration of different air pollutants, i.e., NO<sub>2</sub>, SO<sub>2</sub>, CO, Aerosol, has been evaluated to  
516 examine the positive effects of COVID-19 lockdown on air quality across the world. Sentinel  
517 5P satellite mission is one of the finest space-borne applications that provide the crucial key  
518 information of air quality, ozone, ultra-violet radiation, and climate monitoring and  
519 forecasting (ESA, 2020). TROPOMI widens the application of the satellite air pollution  
520 observation and works in line with other global missions, i.e., SCIAMACHY (2002–2012),  
521 GOME-2 (since 2007), and OMI (since 2004) (Lorente et al., 2019). This data has been used  
522 for many purposes, including air pollution measurement (Zheng et al., 2019; Borsdorff et al.,  
523 2018; Shikwambana et al., 2020), epidemiological studies (Chen et al., 2020; Dutheil et al.,  
524 2020b; Gautam, 2020; Muhammad et al., 2020; Ogen, 2020; Shehzad et al., 2020); monitoring  
525 global volcano (Valade et al., 2019), demographic analysis (Kaplan and Yigit, 2020),  
526 evaluating sun-induced chlorophyll fluorescence (SIF) (Guanter et al., 2015), estimation of  
527 volcanic sulfur dioxide emission (Theys et al., 2019), etc. In addition, the advent of Google  
528 Earth Engine cloud-based suitability in handling the large volume of spatial data facilitates the  
529 application of satellite images for timely decision making and offering cost-benefit solutions  
530 to many environmental problems. Furthermore, most of the fine to medium scale satellite data  
531 products are free and open access in nature (Woodcock et al., 2008). This suggests that  
532 transferring ideas from place to place would be easy, which eventually establishes more trust  
533 and transparency in applying the scientific findings to solve real-life problems. Evaluating the  
534 reliability of remote sensing data is always a matter of concern. Since this study has evaluated  
535 the air pollution in cities, which itself is very sensitive in nature, proper and careful evaluation  
536 is required to verify the accuracy of satellite estimates to draw a data-driven conclusion that  
537 may use further as a reference in future studies. Many studies across the world have evaluated  
538 the reliability of Sentinel 5P pollution data with ground monitored measurements. Lorente et  
539 al. (2019) have examined the reliability of Sentinel TROPOMI tropospheric column NO<sub>2</sub>  
540 density with ground monitored (ground monitored NO<sub>2</sub> boundary layer height over the Eiffel  
541 Tower was used in this purpose) data and found a very good agreement ( $R^2 = 0.88$ ) between  
542 the two estimates. Griffin et al., (2019) study on validating TROPOMI data with aircraft and  
543 surface in situ NO<sub>2</sub> observations over the Canadian oil sands found that the TROPOMI vertical  
544 NO<sub>2</sub> column densities are strongly correlated ( $R^2 = 0.86$ ) with the aircraft and ground in situ  
545 NO<sub>2</sub> observations with a low bias (15–30 %).

### 546 *4.2 Anthropogenic emission and ecosystem services*

547 In this study, the spatial and temporal distribution and changes in different air pollution  
548 were measured for different cities across the world. A fixed timeframe (1<sup>st</sup> February to 11<sup>th</sup>  
549 May) was considered for the spatial and temporal analysis and subsequent interpretation. For  
550 all the 20 cities, NO<sub>2</sub> concentration was found to be decreased with mixed intensities. Due to  
551 the imposition of worldwide lockdown and resulted in anthropogenic emission switch-off, air  
552 pollution across the world has been reduced significantly. Among the countries, the highest

553 NO<sub>2</sub> reduction was observed for Netherlands (70%), Japan (64%), Macao (60%), Lebanon  
554 (55%), Italy (54%), India (54%), Monaco (54%), North Korea (51%), Hungary (50%), and  
555 Kuwait (50%), respectively. While an incremental trend of NO<sub>2</sub> emission was found in the  
556 Island countries, i.e., Kiribati (213%), Howland Island (136%), Jarvis Island (129%), Nauru  
557 (93%), Pacific Islands (Palau) (81%) along with other countries such as Indonesia (74%), Nepal  
558 (57%), Mozambique (56%), Norfolk Island (55%), and Jan Mayen (52%), where COVID1-9  
559 lockdown has not implemented or followed strictly (**Fig. S11, Table. S2, Table. S3**). For CO,  
560 the maximum reduction was observed in Ecuador (6%), Colombia (6%), Venezuela (4%),  
561 Macau (4%), South Korea (4%), North Korea (4%), Byelarus (3%), Singapore (3%), Estonia  
562 (3%), and Latvia (3%), respectively. While, during the lockdown period, an increasing trend  
563 of CO emission was documented for some countries, such as Sao Tome and Principe (14%),  
564 Equatorial Guinea (14%), Gabon (13%), Argentina (13%), Falkland Islands (13%), Uruguay  
565 (12%), Congo (12%), Bouvet Island (11%), and Cameroon (11%), respectively. For both NO<sub>2</sub>  
566 and CO, the maximum reduction is recorded for the countries which have been strongly  
567 affected by the COVID pandemic. The economic loss due to this exceeding level of air  
568 pollution has also been evaluated in this study. However, in this study, only the median  
569 externality values of the air pollutants are considered for the valuation and subsequent  
570 interpretation. This one dimension and linear valuation approach will not be able to track down  
571 the overall economic impact of air pollution on human life. Therefore, research that broadens  
572 the scope of valuation needs to be initiated for exploring the importance of proper monetary  
573 valuation in environmental studies.

#### 574 *4.3 Human mobility and its association with air pollution*

575 The connection between human mobility and air pollution levels in selected cities were  
576 also examined in this research. Both Apple and Google mobility data were used for this  
577 purpose. Results derived from both the report suggest that due to the mandatory lockdown and  
578 resulted in limited outdoor human activities, mobility has been reduced significantly across the  
579 world. This drastic reduction of human mobility could contribute to the reduced level of air  
580 pollution observed in the last few months. For most of the cities considered in this study, human  
581 mobility has been reduced up to 80% from the baseline mobility. The highest reduction in  
582 mobility was found in the European cities. To prevent infection, the authorities in these cities  
583 implemented preventive measures, which included partial lockdown in different sectors,  
584 including restricted outdoor social activities. This mandatory imposition of lockdown has  
585 resulted in a reduced level of traffic volume in cities (**Fig. 11, Table. S6**). The mobility analysis  
586 thus suggests that by introducing sustainable transport plans and policies, air pollution in the  
587 urban regions can be minimised to a certain extent. The periodic and temporary lockdown can  
588 also be adopted in the highly polluted cities if no other alternatives are feasible at the place. A  
589 similar strategy has already been adopted by New Delhi Government by introducing  
590 “odd/even” transport scheme where private vehicles with odd digit (1, 3, 5, 7, 9) registration  
591 numbers will be allowed on roads on odd dates and vehicles with even digit (0, 2, 4, 6, 8)  
592 registration numbers can use the vehicles on even dates. In addition, the [Mahato et al.](#) study  
593 has observed a 40% to 50% improvement in air quality in Delhi within the first week of  
594 lockdown. [He et al. \(2020\)](#) study on short-term impacts of COVID-19 lockdown on urban air  
595 pollution has found that within a week, the AQI in the locked-down cities in China has been  
596 reduced by 19.84 points (PM<sub>2.5</sub> goes down by 14.07 µg m<sup>-3</sup>) compared to the cities where

597 lockdown has not been implemented strictly. The findings suggest an increased clean air  
598 ecosystem services in cities under the cessation of human activities.

599

## 600 **5. Conclusion**

601 This study has evaluated the effect of COVID-19 lockdown on air quality ecosystem  
602 services across the world. A total of 20 major cities were considered for the analysis and  
603 subsequent interpretation. Both satellite and ground air pollution data were utilised for  
604 examining the association between COVID pandemic led lockdown and improving status of  
605 air quality ecosystem services across the cities. The major findings of this research are:

- 606 1) Among the 20 cities, the average NO<sub>2</sub> concentration (1 Feb to 11 May) was found  
607 highest in Tehran, followed by Milan, New York, Paris, Turin, Chicago, Cologne, and  
608 Philadelphia.
- 609 2) The lowest NO<sub>2</sub> concentration (1 Feb to 11 May) was observed in Sao Paulo, Brussels,  
610 and Denver.
- 611 3) For NO<sub>2</sub>, the highest reduction was detected in Paris (45.94%), followed by Detroit  
612 (40.29%), Milan (36.85%), Turin (36.83%), Frankfurt (36.36%), Philadelphia  
613 (34.45%), London (34.15%), and Madrid (34.03%), respectively.
- 614 4) While, a comparably lower reduction of NO<sub>2</sub> is observed in Los Angeles (10.54%), Sao  
615 Paulo (17.17%), Antwerp (24.14%), Tehran (24.54%), and Rotterdam (26.72%), during  
616 the lockdown period.
- 617 5) For CO, the maximum reduction was recorded for New York (4.24%), followed by  
618 Detroit (4.09%), Sao Paulo (3.88%), Philadelphia (3.45%), Milan (3.17%), Barcelona  
619 (2.86%), respectively.
- 620 6) The daily NO<sub>2</sub> and SO<sub>2</sub> AQI during the lockdown period suggest that all the cities are  
621 benefitted by having good quality air due to anthropogenic pollution switch-off and  
622 restricted human interventions.
- 623 7) Among the cities, the highest economic values (derived from public health burden  
624 valuation approach) was estimates for New York (501 million US\$), followed by  
625 London (375 million US\$), Chicago (137 million US\$), Paris (124 million US\$),  
626 Madrid (90 million US\$), Philadelphia (89 million US\$), Milan (78 million US\$),  
627 Cologne (67 million US\$), Los Angeles (67 million US\$), Frankfurt (52 million US\$),  
628 Turin (45 million US\$), Detroit (43 million US\$), Barcelona (41 million US\$), Sao  
629 Paulo (40 million US\$), Tehran (37 million US\$), Denver (30 million US\$), Antwerp  
630 (16 million US\$), Utrecht (14 million US\$), Brussels (9 million US\$), and Rotterdam  
631 (9 million US\$), respectively.
- 632 8) For NO<sub>2</sub>, the economic significance of reduced anthropogenic emission is found  
633 maximum in Tehran (31700 \$), followed by London (21887 \$), New York (12975 \$),  
634 and Madrid (9072 \$).
- 635 9) For CO, the maximum ecosystem service value was calculated maximum for Sao Paulo  
636 (42302 \$), followed by New York (36478 \$), London (17043 \$), Detroit (16038 \$), and  
637 Los Angeles (14472 \$).
- 638 10) Among the countries, the highest NO<sub>2</sub> reduction was observed for Netherlands (70%),  
639 Japan (64%), Macao (60%), Lebanon (55%), Italy (54%), India (54%), Monaco (54%),  
640 North Korea (51%), Hungary (50%), and Kuwait (50%).



641 11) For CO, the maximum reduction was observed in Ecuador (6%), Colombia (6%),  
642 Venezuela (4%), Macau (4%), South Korea (4%), North Korea (4%), Byelarus (3%),  
643 Singapore (3%), Estonia (3%), and Latvia (3%).

644 The present research has made an effort to investigate the human impact on the natural  
645 environment by taking COVID-19 lockdown and its resultant reduction of air pollution. Both  
646 physical and monetary valuation was carried out to assess the synergic effect of this pandemic  
647 led lockdown on air pollutions at 20 cities across the world. A strong connection between  
648 human interventions and accelerating levels of air pollution was observed in most of these  
649 cities. Both satellite and ground-based estimates are suggesting the positive effect of the limited  
650 human interference on natural environments. Further research in this direction is needed to  
651 explore this synergic association more explicitly.

652

653

654

## 655 **References**

- 656 Abhijith, K. V, Kumar, P., Gallagher, J., McNabola, A., Baldauf, R., Pilla, F., Broderick, B.,  
657 Di Sabatino, S., Pulvirenti, B., 2017. Air pollution abatement performances of green  
658 infrastructure in open road and built-up street canyon environments – A review. *Atmos.*  
659 *Environ.* 162, 71–86. <https://doi.org/https://doi.org/10.1016/j.atmosenv.2017.05.014>
- 660 Adekola, O., Mitchell, G., Grainger, A., 2015. Inequality and ecosystem services: The value  
661 and social distribution of Niger Delta wetland services. *Ecosyst. Serv.* 12, 42–54.  
662 <https://doi.org/10.1016/j.ecoser.2015.01.005>
- 663 Affek, A.N., Kowalska, A., 2017. Ecosystem potentials to provide services in the view of direct  
664 users. *Ecosyst. Serv.* 26, 183–196.  
665 <https://doi.org/https://doi.org/10.1016/j.ecoser.2017.06.017>
- 666 Ash, N., Blanco, H., Garcia, K., & Brown, C. (2010). *Ecosystems and human well-being: a*  
667 *manual for assessment practitioners*. Island Press.
- 668 Bao, R., Zhang, A., 2020. Does lockdown reduce air pollution? Evidence from 44 cities in  
669 northern China. *Sci. Total Environ.* 731, 139052.  
670 <https://doi.org/10.1016/j.scitotenv.2020.139052>
- 671 Baró, F., Chaparro, L., Gómez-Baggethun, E., Langemeyer, J., Nowak, D.J., Terradas, J., 2014.  
672 Contribution of ecosystem services to air quality and climate change mitigation policies:  
673 The case of urban forests in Barcelona, Spain. *Ambio* 43, 466–479.  
674 <https://doi.org/10.1007/s13280-014-0507-x>
- 675 Bastian, O., Syrbe, R.-U., Rosenberg, M., Rahe, D., Grunewald, K., 2013. The five pillar EPPS  
676 framework for quantifying, mapping and managing ecosystem services. *Ecosyst. Serv.* 4,  
677 15–24. <https://doi.org/https://doi.org/10.1016/j.ecoser.2013.04.003>
- 678 Bherwani, H., Nair, M., Musugu, K., Gautam, S., Gupta, A., Kapley, A., Kumar, R., 2020.  
679 Valuation of air pollution externalities: comparative assessment of economic damage and  
680 emission reduction under COVID-19 lockdown. *Air Qual. Atmos. Heal.* 13, 683–694.  
681 <https://doi.org/10.1007/s11869-020-00845-3>
- 682 Borsdorff, T., Aan de Brugh, J., Hu, H., Aben, I., Hasekamp, O., Landgraf, J., 2018. Measuring  
683 Carbon Monoxide With TROPOMI: First Results and a Comparison With ECMWF-IFS  
684 Analysis Data. *Geophys. Res. Lett.* 45, 2826–2832.  
685 <https://doi.org/10.1002/2018GL077045>
- 686 Braat, L.C., de Groot, R., 2012. The ecosystem services agenda: bridging the worlds of natural  
687 science and economics, conservation and development, and public and private policy.  
688 *Ecosyst. Serv.* 1, 4–15. <https://doi.org/https://doi.org/10.1016/j.ecoser.2012.07.011>
- 689 Burkhard, B., Kandziora, M., Hou, Y., Müller, F., 2014. Ecosystem service potentials, flows  
690 and demands-concepts for spatial localisation, indication and quantification. *Landsc.*  
691 *Online* 34, 1–32. <https://doi.org/10.3097/LO.201434>
- 692 Burkhard, B., Kroll, F., Müller, F., Windhorst, W., 2009. Landscapes' capacities to provide  
693 ecosystem services - A concept for land-cover based assessments. *Landsc. Online* 15, 1–  
694 22. <https://doi.org/10.3097/LO.200915>
- 695 Castro, A., Künzli, N., Götschi, T., 2017. Health benefits of a reduction of PM10 and NO2  
696 exposure after implementing a clean air plan in the Agglomeration Lausanne-Morges. *Int.*

- 697 J. Hyg. Environ. Health 220, 829–839.  
698 <https://doi.org/https://doi.org/10.1016/j.ijheh.2017.03.012>
- 699 Chan, C.K., Yao, X., 2008. Air pollution in mega cities in China. *Atmos. Environ.* 42, 1–42.  
700 <https://doi.org/https://doi.org/10.1016/j.atmosenv.2007.09.003>
- 701 Charles, M., Ziv, G., Bohrer, G., Bakshi, B.R., 2020. Connecting air quality regulating  
702 ecosystem services with beneficiaries through quantitative serviceshed analysis. *Ecosyst.*  
703 *Serv.* 41, 101057. <https://doi.org/10.1016/j.ecoser.2019.101057>
- 704 Chen, K., Wang, M., Huang, C., Kinney, P.L., Anastas, P.T., 2020. Air pollution reduction and  
705 mortality benefit during the COVID-19 outbreak in China. *Lancet Planet. Heal.* 2019,  
706 2019–2021. [https://doi.org/10.1016/S2542-5196\(20\)30107-8](https://doi.org/10.1016/S2542-5196(20)30107-8)
- 707 Chinazzi, M., Davis, J.T., Ajelli, M., Gioannini, C., Litvinova, M., Merler, S., Pastore y Piontti,  
708 A., Mu, K., Rossi, L., Sun, K., Viboud, C., Xiong, X., Yu, H., Halloran, M.E., Longini,  
709 I.M., Vespignani, A., 2020. The effect of travel restrictions on the spread of the 2019  
710 novel coronavirus (COVID-19) outbreak. *Science* (80-. ). 368, 395 LP – 400.  
711 <https://doi.org/10.1126/science.aba9757>
- 712 COMEAP, 2010. "The Mortality Effects of Long Term Exposure to Particulate AirPollution in  
713 the UK", Report Produced by the Health Protection Agency for theCommittee on the  
714 Medical Effects of Air Pollutants, ISBN 978-0-85951-685-3,98 pp
- 715 Comberti, C., Thornton, T.F., Wyllie de Echeverria, V., Patterson, T., 2015. Ecosystem  
716 services or services to ecosystems? Valuing cultivation and reciprocal relationships  
717 between humans and ecosystems. *Glob. Environ. Chang.* 34, 247–262.  
718 <https://doi.org/https://doi.org/10.1016/j.gloenvcha.2015.07.007>
- 719 Costanza, R., d'Arge, R., De Groot, R., Farber, S., Grasso, M., Hannon, B., Limburg, K.,  
720 Naeem, S., O'neill, R. V, Paruelo, J., 1997. The value of the world's ecosystem services  
721 and natural capital. *Nature* 387, 253–260.
- 722 Costanza, R., De Groot, R., Sutton, P., Van der Ploeg, S., Anderson, S.J., Kubiszewski, I.,  
723 Farber, S., Turner, R.K., 2014. Changes in the global value of ecosystem services. *Glob.*  
724 *Environ. Chang.* 26, 152–158.
- 725 De Brouwer, E., Raimondi, D., Moreau, Y., 2020. Modeling the COVID-19 outbreaks and the  
726 effectiveness of the containment measures adopted across countries. *medRxiv*  
727 2020.04.02.20046375. <https://doi.org/10.1101/2020.04.02.20046375>
- 728 De Carvalho, R.M., Szlafsztein, C.F., 2019. Urban vegetation loss and ecosystem services: The  
729 influence on climate regulation and noise and air pollution. *Environ. Pollut.* 245, 844–  
730 852. <https://doi.org/10.1016/j.envpol.2018.10.114>
- 731 Dutheil, F., Baker, J.S., Navel, V., 2020a. COVID-19 as a factor influencing air pollution?  
732 *Environ. Pollut.* 263, 2019–2021. <https://doi.org/10.1016/j.envpol.2020.114466>
- 733 Dutheil, F., Baker, J.S., Navel, V., 2020b. COVID-19 as a factor influencing air pollution?  
734 *Environ. Pollut.* 263, 114466.  
735 <https://doi.org/https://doi.org/10.1016/j.envpol.2020.114466>
- 736 Etchie, T.O., Etchie, A.T., Adewuyi, G.O., Pillarisetti, A., Sivanesan, S., Krishnamurthi, K.,  
737 Arora, N.K., 2018. The gains in life expectancy by ambient PM2.5 pollution reductions  
738 in localities in Nigeria. *Environ. Pollut.* 236, 146–157.  
739 <https://doi.org/10.1016/j.envpol.2018.01.034>

- 740 Escobedo, F.J., Wagner, J.E., Nowak, D.J., De la Maza, C.L., Rodriguez, M., Crane, D.E.,  
741 2008. Analysing the cost effectiveness of Santiago, Chile's policy of using urban forests  
742 to improve air quality. *J. Environ. Manage.* 86, 148–157.  
743 <https://doi.org/https://doi.org/10.1016/j.jenvman.2006.11.029>
- 744 Feng, L., Liao, W., 2016. Legislation, plans, and policies for prevention and control of air  
745 pollution in China: achievements, challenges, and improvements. *J. Clean. Prod.* 112,  
746 1549–1558. <https://doi.org/https://doi.org/10.1016/j.jclepro.2015.08.013>
- 747 Fisher, B., Turner, R.K., Morling, P., 2009. Defining and classifying ecosystem services for  
748 decision making. *Ecol. Econ.* 68, 643–653.  
749 <https://doi.org/https://doi.org/10.1016/j.ecolecon.2008.09.014>
- 750 Gautam, S., 2020. The Influence of COVID-19 on Air Quality in India: A Boon or Inutile.  
751 *Bull. Environ. Contam. Toxicol.* 104, 724–726. [https://doi.org/10.1007/s00128-020-](https://doi.org/10.1007/s00128-020-02877-y)  
752 [02877-y](https://doi.org/10.1007/s00128-020-02877-y)
- 753 Gómez-Baggethun, E., Barton, D.N., 2013. Classifying and valuing ecosystem services for  
754 urban planning. *Ecol. Econ.* 86, 235–245. <https://doi.org/10.1016/j.ecolecon.2012.08.019>
- 755 Goscé, L., Johansson, A., 2018. Analysing the link between public transport use and airborne  
756 transmission: mobility and contagion in the London underground. *Environ. Heal.* 17, 84.  
757 <https://doi.org/10.1186/s12940-018-0427-5>
- 758 Griffin, D., Zhao, X., McLinden, C.A., Boersma, F., Bourassa, A., Dammers, E., Degenstein,  
759 D., Eskes, H., Fehr, L., Fioletov, V., Hayden, K., Kharol, S.K., Li, S.-M., Makar, P.,  
760 Martin, R. V, Mihele, C., Mittermeier, R.L., Krotkov, N., Sneep, M., Lamsal, L.N.,  
761 Linden, M. ter, Geffen, J. van, Veefkind, P., Wolde, M., 2019. High-Resolution Mapping  
762 of Nitrogen Dioxide With TROPOMI: First Results and Validation Over the Canadian Oil  
763 Sands. *Geophys. Res. Lett.* 46, 1049–1060. <https://doi.org/10.1029/2018GL081095>
- 764 Guanter, L., Aben, I., Tol, P., Krijger, J.M., Hollstein, A., Köhler, P., Damm, A., Joiner, J.,  
765 Frankenberg, C., Landgraf, J., 2015. Potential of the TROPospheric Monitoring  
766 Instrument (TROPOMI) onboard the Sentinel-5 Precursor for the monitoring of terrestrial  
767 chlorophyll fluorescence. *Atmos. Meas. Tech.* 8, 1337–1352. [https://doi.org/10.5194/amt-](https://doi.org/10.5194/amt-8-1337-2015)  
768 [8-1337-2015](https://doi.org/10.5194/amt-8-1337-2015)
- 769 Guerriero, C., Chatzidiakou, L., Cairns, J., Mumovic, D., 2016. The economic benefits of  
770 reducing the levels of nitrogen dioxide (NO<sub>2</sub>) near primary schools: The case of London.  
771 *J. Environ. Manage.* 181, 615–622.  
772 <https://doi.org/https://doi.org/10.1016/j.jenvman.2016.06.039>
- 773 Guttikunda, S.K., Goel, R., Pant, P., 2014. Nature of air pollution, emission sources, and  
774 management in the Indian cities. *Atmos. Environ.* 95, 501–510.  
775 <https://doi.org/https://doi.org/10.1016/j.atmosenv.2014.07.006>
- 776 He, G., Pan, Y., Tanaka, T., 2020. The short-term impacts of COVID-19 lockdown on urban  
777 air pollution in China. *Nat. Sustain.* <https://doi.org/10.1038/s41893-020-0581-y>
- 778 He, L., Zhang, S., Hu, J., Li, Z., Zheng, X., Cao, Y., Xu, G., Yan, M., Wu, Y., 2020. On-road  
779 emission measurements of reactive nitrogen compounds from heavy-duty diesel trucks in  
780 China. *Environ. Pollut.* 262, 114280.  
781 <https://doi.org/https://doi.org/10.1016/j.envpol.2020.114280>
- 782 Hu, J., Ying, Q., Wang, Y., Zhang, H., 2015. Characterising multi-pollutant air pollution in

- 783 China: Comparison of three air quality indices. *Environ. Int.* 84, 17–25.  
784 <https://doi.org/10.1016/j.envint.2015.06.014>
- 785 Jeanjean, A.P.R., Gallagher, J., Monks, P.S., Leigh, R.J., 2017. Ranking current and  
786 prospective NO<sub>2</sub> pollution mitigation strategies: An environmental and economic  
787 modelling investigation in Oxford Street, London. *Environ. Pollut.* 225, 587–597.  
788 <https://doi.org/https://doi.org/10.1016/j.envpol.2017.03.027>
- 789 Kanniah, K.D., Kamarul Zaman, N.A.F., Kaskaoutis, D.G., Latif, M.T., 2020. COVID-19's  
790 impact on the atmospheric environment in the Southeast Asia region. *Sci. Total Environ.*  
791 736, 139658. <https://doi.org/10.1016/j.scitotenv.2020.139658>
- 792 KAPLAN, G., YİĞİT AVDAN, Z., 2020. Space-Borne Air Pollution Observation From  
793 Sentinel-5P Tropomi: Relationship Between Pollutants, Geographical and Demographic  
794 Data. *Int. J. Eng. Geosci.* 130–137. <https://doi.org/10.26833/ijeg.644089>
- 795 Kerimray, A., Baimatova, N., Ibragimova, O.P., Bukenov, B., Kenessov, B., 2020. Since  
796 January 2020 Elsevier has created a COVID-19 resource centre with free information in  
797 English and Mandarin on the novel coronavirus COVID- 19 . The COVID-19 resource  
798 centre is hosted on Elsevier Connect , the company ' s public news and information .
- 799 Kim Oanh, N.T., Upadhyay, N., Zhuang, Y.-H., Hao, Z.-P., Murthy, D.V.S., Lestari, P.,  
800 Villarin, J.T., Chengchua, K., Co, H.X., Dung, N.T., Lindgren, E.S., 2006. Particulate air  
801 pollution in six Asian cities: Spatial and temporal distributions, and associated sources.  
802 *Atmos. Environ.* 40, 3367–3380.  
803 <https://doi.org/https://doi.org/10.1016/j.atmosenv.2006.01.050>
- 804 Kumar, P., Khare, M., Harrison, R.M., Bloss, W.J., Lewis, A., Coe, H., Morawska, L., 2015.  
805 New directions: [Air pollution challenges for developing megacities like](#)  
806 [Delhi](#). *Atmospheric Environment* 122, 657-661.
- 807 Kumar, P., Andrade, M.F., Ynoue, R.Y., Fornaro, A., de Freitas, E.D., Martins, Martins,  
808 J.L.D., Albuquerque, T., Zhang, Y., Morawska, L., 2016. [New Directions: From biofuels](#)  
809 [to wood stoves: the modern and ancient air quality challenges in the megacity of São](#)  
810 [Paulo](#). *Atmospheric Environment* 140, 364-369.
- 811 Kumar, P., Druckman, A., Gallagher, J., Gatersleben, B., Allison, S., Eisenman, T.S., Hoang,  
812 U., Hama, S., Tiwari, A., Sharma, A., Abhijith, KV, Adlakha, D., McNabola, A., Astell-  
813 Burt, T., Feng, X., Skeldon, A.C., de Lusignan, S., Morawska, L., 2019. [The Nexus](#)  
814 [between Air Pollution, Green Infrastructure and Human Health](#). *Environment*  
815 *International* 133,105181.
- 816 Kumar, P., Hama, S., Omidvarborna, H., Sharma, A., Sahani, J., Abhijith, K.V., Debele, S.,  
817 Zavala-Reyes, J., Barwise, Y., Tiwari, A., 2020a. Temporary reduction in fine particulate  
818 matter due to 'anthropogenic emissions switch-off' during COVID-19 lockdown in Indian  
819 cities. *Sustain. Cities Soc.* 62, 102382. <https://doi.org/10.1016/j.scs.2020.102382>
- 820 Kumar, P, and Lidia M. "Could fighting airborne transmission be the next line of defence  
821 against COVID-19 spread?." *City and Environment Interactions* (2020): 100033.
- 822 L., C.D., A., P.P., Perry, H., R., B.J., Aaron, van D., V., M.R., J., V.P., Michael, J., S., G.M.,  
823 Arden, P.C., Michael, B., D., B.R., Alain, R., Richard, M., T., B.R., 2015. Ambient  
824 PM<sub>2.5</sub>, O<sub>3</sub>, and NO<sub>2</sub> Exposures and Associations with Mortality over 16 Years of  
825 Follow-Up in the Canadian Census Health and Environment Cohort (CanCHEC).  
826 *Environ. Health Perspect.* 123, 1180–1186. <https://doi.org/10.1289/ehp.1409276>

- 827 Lorente, A., Boersma, K.F., Eskes, H.J., Veefkind, J.P., van Geffen, J.H.G.M., de Zeeuw,  
828 M.B., Denier van der Gon, H.A.C., Beirle, S., Krol, M.C., 2019. Quantification of nitrogen  
829 oxides emissions from build-up of pollution over Paris with TROPOMI. *Sci. Rep.* 9,  
830 20033. <https://doi.org/10.1038/s41598-019-56428-5>
- 831 MA (Millennium Ecosystem Assessment) (2005) *Ecosystems and Human Well-being:*  
832 *Synthesis*. Island Press, Washington DC
- 833 Mahato, S., Pal, S., Ghosh, K.G., 2020. Effect of lockdown amid COVID-19 pandemic on air  
834 quality of the megacity Delhi, India. *Sci. Total Environ.* 730, 139086.  
835 <https://doi.org/10.1016/j.scitotenv.2020.139086>
- 836 Matthews, H.S., Lave, L.B., 2000. Applications of Environmental Valuation for Determining  
837 Externality Costs. *Environ. Sci. Technol.* 34, 1390–1395.  
838 <https://doi.org/10.1021/es9907313>
- 839 Mayer, H., 1999. Air pollution in cities. *Atmos. Environ.* 33, 4029–4037.  
840 [https://doi.org/https://doi.org/10.1016/S1352-2310\(99\)00144-2](https://doi.org/https://doi.org/10.1016/S1352-2310(99)00144-2)
- 841 Monica, C., Ennio, C., Massimo, S., Claudia, G., Giovanna, B., Annunziata, F., Luigi, B.,  
842 Angela, V.M., Patrizia, D.M., Achille, C., Sandra, M., Barbara, P., Sante, M., Lorenzo,  
843 S., Francesco, F., null, null, 2011. Short-Term Effects of Nitrogen Dioxide on Mortality  
844 and Susceptibility Factors in 10 Italian Cities: The EpiAir Study. *Environ. Health*  
845 *Perspect.* 119, 1233–1238. <https://doi.org/10.1289/ehp.1002904>
- 846 Muhammad, S., Long, X., Salman, M., 2020. COVID-19 pandemic and environmental  
847 pollution: A blessing in disguise? *Sci. Total Environ.* 728, 138820.  
848 <https://doi.org/https://doi.org/10.1016/j.scitotenv.2020.138820>
- 849 Nowak, David J. 1994. Understanding the structure. *Journal of Forestry.* 92(10): 42-46.
- 850 Ogen, Y., 2020. Assessing nitrogen dioxide (NO<sub>2</sub>) levels as a contributing factor to coronavirus  
851 (COVID-19) fatality. *Sci. Total Environ.* 726, 138605.  
852 <https://doi.org/https://doi.org/10.1016/j.scitotenv.2020.138605>
- 853 Ortiz, C., Linares, C., Carmona, R., Díaz, J., 2017. Evaluation of short-term mortality  
854 attributable to particulate matter pollution in Spain. *Environ. Pollut.* 224, 541–551.  
855 <https://doi.org/https://doi.org/10.1016/j.envpol.2017.02.037>
- 856 Otmani, A., Benchrif, A., Tahri, M., Bounakhla, M., Chakir, E.M., El Bouch, M., Krombi, M.,  
857 2020. Impact of Covid-19 lockdown on PM<sub>10</sub>, SO<sub>2</sub> and NO<sub>2</sub> concentrations in Salé City  
858 (Morocco). *Sci. Total Environ.* 735, 139541.  
859 <https://doi.org/10.1016/j.scitotenv.2020.139541>
- 860 Pandeya, B., Buytaert, W., Zulkafli, Z., Karpouzoglou, T., Mao, F., Hannah, D.M., 2016. A  
861 comparative analysis of ecosystem services valuation approaches for application at the  
862 local scale and in data scarce regions. *Ecosyst. Serv.* 22, 250–259.  
863 <https://doi.org/https://doi.org/10.1016/j.ecoser.2016.10.015>
- 864 Pilla, F., Broderick, B., 2015. A GIS model for personal exposure to PM<sub>10</sub> for Dublin  
865 commuters. *Sustain. Cities Soc.* 15, 1–10.  
866 <https://doi.org/https://doi.org/10.1016/j.scs.2014.10.005>
- 867 Potschin, M., Haines-Young, R., 2013. Landscapes, sustainability and the place-based analysis  
868 of ecosystem services. *Landsc. Ecol.* 28, 1053–1065. [https://doi.org/10.1007/s10980-012-](https://doi.org/10.1007/s10980-012-9756-x)  
869 [9756-x](https://doi.org/10.1007/s10980-012-9756-x)

- 870 Rai, A.C., Kumar, P., Pilla, F., Skouloudis, A.N., Di Sabatino, S., Ratti, C., Yasar, A.,  
871 Rickerby, D., 2017. End-user perspective of low-cost sensors for outdoor air pollution  
872 monitoring. *Sci. Total Environ.* 607–608, 691–705.  
873 <https://doi.org/https://doi.org/10.1016/j.scitotenv.2017.06.266>
- 874 Rohde, R.A., Muller, R.A., 2015. Air Pollution in China: Mapping of Concentrations and  
875 Sources. *PLoS One* 10, e0135749.
- 876 Sahu, S.K., Kota, S.H., 2017. Significance of PM<sub>2.5</sub> air quality at the Indian capital. *Aerosol*  
877 *Air Qual. Res.* 17, 588–597. <https://doi.org/10.4209/aaqr.2016.06.0262>
- 878 Sannigrahi, S., Bhatt, S., Rahmat, S., Paul, S.K., Sen, S., 2018. Estimating global ecosystem  
879 service values and its response to land surface dynamics during 1995–2015. *J. Environ.*  
880 *Manage.* 223. <https://doi.org/10.1016/j.jenvman.2018.05.091>
- 881 Sannigrahi, S., Chakraborti, S., Joshi, P.K., Keesstra, S., Sen, S., Paul, S.K., Kreuter, U.,  
882 Sutton, P.C., Jha, S., Dang, K.B., 2019a. Ecosystem service value assessment of a natural  
883 reserve region for strengthening protection and conservation. *J. Environ. Manage.* 244,  
884 208–227. <https://doi.org/10.1016/j.jenvman.2019.04.095>
- 885 Sannigrahi, S., Pilla, F., Basu, B., Basu, A.S. and Molter, A., 2020a. Examining the association  
886 between socio-demographic composition and COVID-19 fatalities in the European region  
887 using spatial regression approach. *Sustainable Cities and Society*, p.102418.
- 888 Sannigrahi, S., Zhang, Q., Joshi, P.K., Sutton, P.C., Keesstra, S., Roy, P.S., Pilla, F., Basu, B.,  
889 Wang, Y., Jha, S., 2020b. Examining effects of climate change and land use dynamic on  
890 biophysical and economic values of ecosystem services of a natural reserve region. *J.*  
891 *Clean. Prod.* 257, 120424.
- 892 Sannigrahi, S., Zhang, Q., Pilla, F., Joshi, P.K., Basu, B., Keesstra, S., Roy, P.S., Wang, Y.,  
893 Sutton, P.C., Chakraborti, S., 2020c. Responses of ecosystem services to natural and  
894 anthropogenic forcings: A spatial regression based assessment in the world’s largest  
895 mangrove ecosystem. *Sci. Total Environ.* 715, 137004.
- 896 Sasidharan, M., Singh, A., Torbaghan, M.E., Parlikad, A.K., 2020. A vulnerability-based  
897 approach to human-mobility reduction for countering COVID-19 transmission in London  
898 while considering local air quality. *Sci. Total Environ.* 741, 140515.  
899 <https://doi.org/https://doi.org/10.1016/j.scitotenv.2020.140515>
- 900 Schirpke, U., Scolozzi, R., De Marco, C., Tappeiner, U., 2014. Mapping beneficiaries of  
901 ecosystem services flows from Natura 2000 sites. *Ecosyst. Serv.* 9, 170–179.  
902 <https://doi.org/https://doi.org/10.1016/j.ecoser.2014.06.003>
- 903 Sharma, S., Zhang, M., Anshika, Gao, J., Zhang, H., Kota, S.H., 2020. Effect of restricted  
904 emissions during COVID-19 on air quality in India. *Sci. Total Environ.* 728, 138878.  
905 <https://doi.org/10.1016/j.scitotenv.2020.138878>
- 906 Shehzad, K., Sarfraz, M., Shah, S.G.M., 2020. The impact of COVID-19 as a necessary evil  
907 on air pollution in India during the lockdown. *Environ. Pollut.* 266, 115080.  
908 <https://doi.org/https://doi.org/10.1016/j.envpol.2020.115080>
- 909 Shikwambana, L., Mhangara, P., Mbatha, N., 2020. Trend analysis and first time observations  
910 of sulphur dioxide and nitrogen dioxide in South Africa using TROPOMI/Sentinel-5 P  
911 data. *Int. J. Appl. Earth Obs. Geoinf.* 91, 102130.  
912 <https://doi.org/https://doi.org/10.1016/j.jag.2020.102130>

- 913 Sicard, P., De Marco, A., Agathokleous, E., Feng, Z., Xu, X., Paoletti, E., Rodriguez, J.J.D.,  
914 Calatayud, V., 2020. Amplified ozone pollution in cities during the COVID-19 lockdown.  
915 *Sci. Total Environ.* 735. <https://doi.org/10.1016/j.scitotenv.2020.139542>
- 916 Spangenberg, J.H., von Haaren, C., Settele, J., 2014. The ecosystem service cascade: Further  
917 developing the metaphor. Integrating societal processes to accommodate social processes  
918 and planning, and the case of bioenergy. *Ecol. Econ.* 104, 22–32.  
919 <https://doi.org/https://doi.org/10.1016/j.ecolecon.2014.04.025>
- 920 Theys, N., Hedelt, P., De Smedt, I., Lerot, C., Yu, H., Vlietinck, J., Pedergrana, M., Arellano,  
921 S., Galle, B., Fernandez, D., Carlito, C.J.M., Barrington, C., Taisne, B., Delgado-  
922 Granados, H., Loyola, D., Van Roozendaal, M., 2019. Global monitoring of volcanic SO<sub>2</sub>  
923 degassing with unprecedented resolution from TROPOMI onboard Sentinel-5 Precursor.  
924 *Sci. Rep.* 9, 2643. <https://doi.org/10.1038/s41598-019-39279-y>
- 925 Troko, J., Myles, P., Gibson, J., Hashim, A., Enstone, J., Kingdon, S., Packham, C., Amin, S.,  
926 Hayward, A., Van-Tam, J.N., 2011. Is public transport a risk factor for acute respiratory  
927 infection? *BMC Infect. Dis.* 11, 16. <https://doi.org/10.1186/1471-2334-11-16>
- 928 Valade, S., Ley, A., Massimetti, F., D'Hondt, O., Laiolo, M., Coppola, D., Loibl, D., Hellwich,  
929 O., Walter, T.R., 2019. Towards global volcano monitoring using multisensor sentinel  
930 missions and artificial intelligence: The MOUNTS monitoring system. *Remote Sens.* 11,  
931 1–31. <https://doi.org/10.3390/rs11131528>
- 932 Veefkind, J.P., Aben, I., McMullan, K., Förster, H., de Vries, J., Otter, G., Claas, J., Eskes,  
933 H.J., de Haan, J.F., Kleipool, Q., van Weele, M., Hasekamp, O., Hoogeveen, R., Landgraf,  
934 J., Snel, R., Tol, P., Ingmann, P., Voors, R., Kruizinga, B., Vink, R., Visser, H., Levelt,  
935 P.F., 2012. TROPOMI on the ESA Sentinel-5 Precursor: A GMES mission for global  
936 observations of the atmospheric composition for climate, air quality and ozone layer  
937 applications. *Remote Sens. Environ.* 120, 70–83.  
938 <https://doi.org/https://doi.org/10.1016/j.rse.2011.09.027>
- 939 Venter, Z.S., Aunan, K., Chowdhury, S., Lelieveld, J., 2020. COVID-19 lockdowns cause  
940 global air pollution declines with implications for public health risk. *medRxiv*  
941 2020.04.10.20060673. <https://doi.org/10.1101/2020.04.10.20060673>
- 942 Viscusi, W.K., Masterman, C.J., 2017. Income Elasticities and Global Values of a Statistical  
943 Life. *J. Benefit-Cost Anal.* 8, 226–250. <https://doi.org/10.1017/bca.2017.12>
- 944 Wang, S., Hao, J., 2012. Air quality management in China: Issues, challenges, and options. *J.*  
945 *Environ. Sci.* 24, 2–13. [https://doi.org/https://doi.org/10.1016/S1001-0742\(11\)60724-9](https://doi.org/https://doi.org/10.1016/S1001-0742(11)60724-9)
- 946 Woodcock, C. E., Allen, R., Anderson, M., Belward, A., Bindschadler, R., Cohen, W., ... &  
947 Nemani, R. (2008). Free access to Landsat imagery. *SCIENCE VOL 320*: 1011.
- 948 Zhang, H., Wang, Shuxiao, Hao, J., Wang, X., Wang, Shulan, Chai, F., Li, M., 2016. Air  
949 pollution and control action in Beijing. *J. Clean. Prod.* 112, 1519–1527.  
950 <https://doi.org/https://doi.org/10.1016/j.jclepro.2015.04.092>
- 951 Zhang, Q., Song, C. and Chen, X., 2018. Effects of China's payment for ecosystem services  
952 programs on cropland abandonment: A case study in Tiantangzhai Township, Anhui,  
953 China. *Land use policy*, 73, pp.239-248.
- 954 Zhang, Q., Wang, Y., Tao, S., Bilsborrow, R.E., Qiu, T., Liu, C., Sannigrahi, S., Li, Q. and  
955 Song, C., 2020. Divergent socioeconomic-ecological outcomes of China's conversion of



- 956 cropland to forest program in the subtropical mountainous area and the semi-arid Loess  
957 Plateau. *Ecosystem Services*, 45, p.101167.
- 958 Zheng, Z., Yang, Z., Wu, Z., Marinello, F., 2019. Spatial variation of NO<sub>2</sub> and its impact  
959 factors in China: An application of sentinel-5P products. *Remote Sens.* 11, 1–24.  
960 <https://doi.org/10.3390/rs11161939>
- 961 Zhu, Y., Xie, J., Huang, F., Cao, L., 2020. Association between short-term exposure to air  
962 pollution and COVID-19 infection: Evidence from China. *Sci. Total Environ.* 727,  
963 138704. <https://doi.org/10.1016/j.scitotenv.2020.138704>
- 964

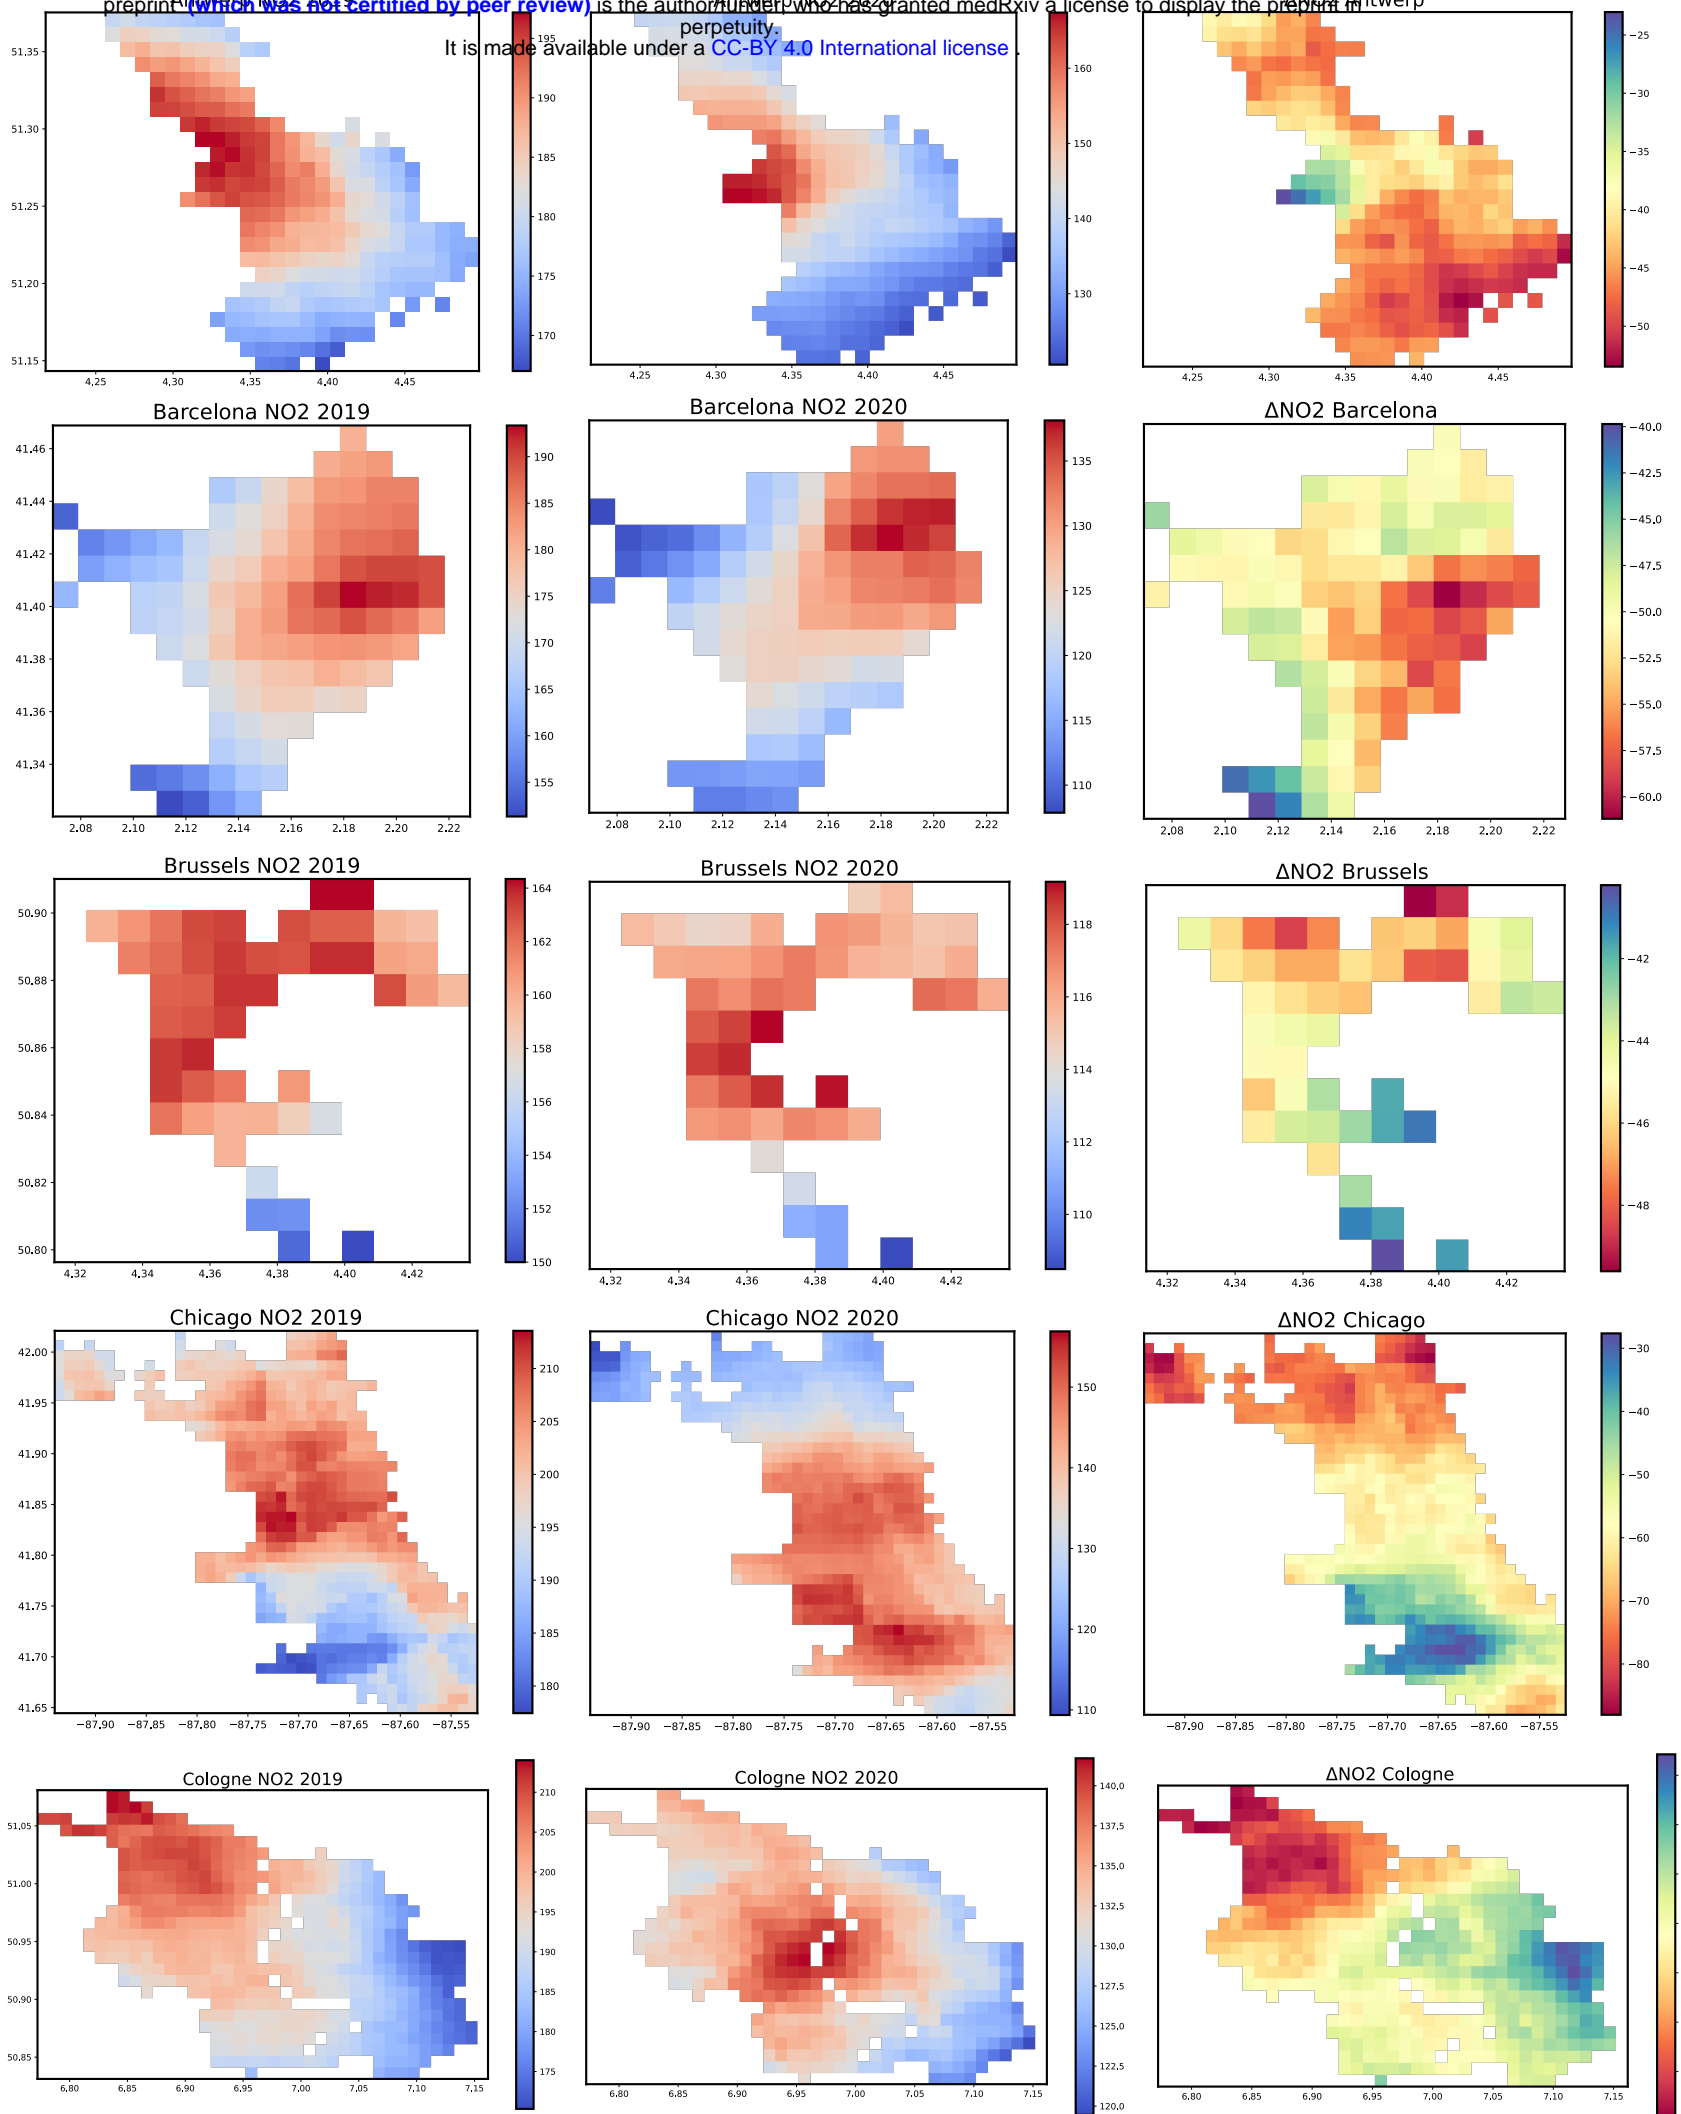

Fig. 1

Continued....

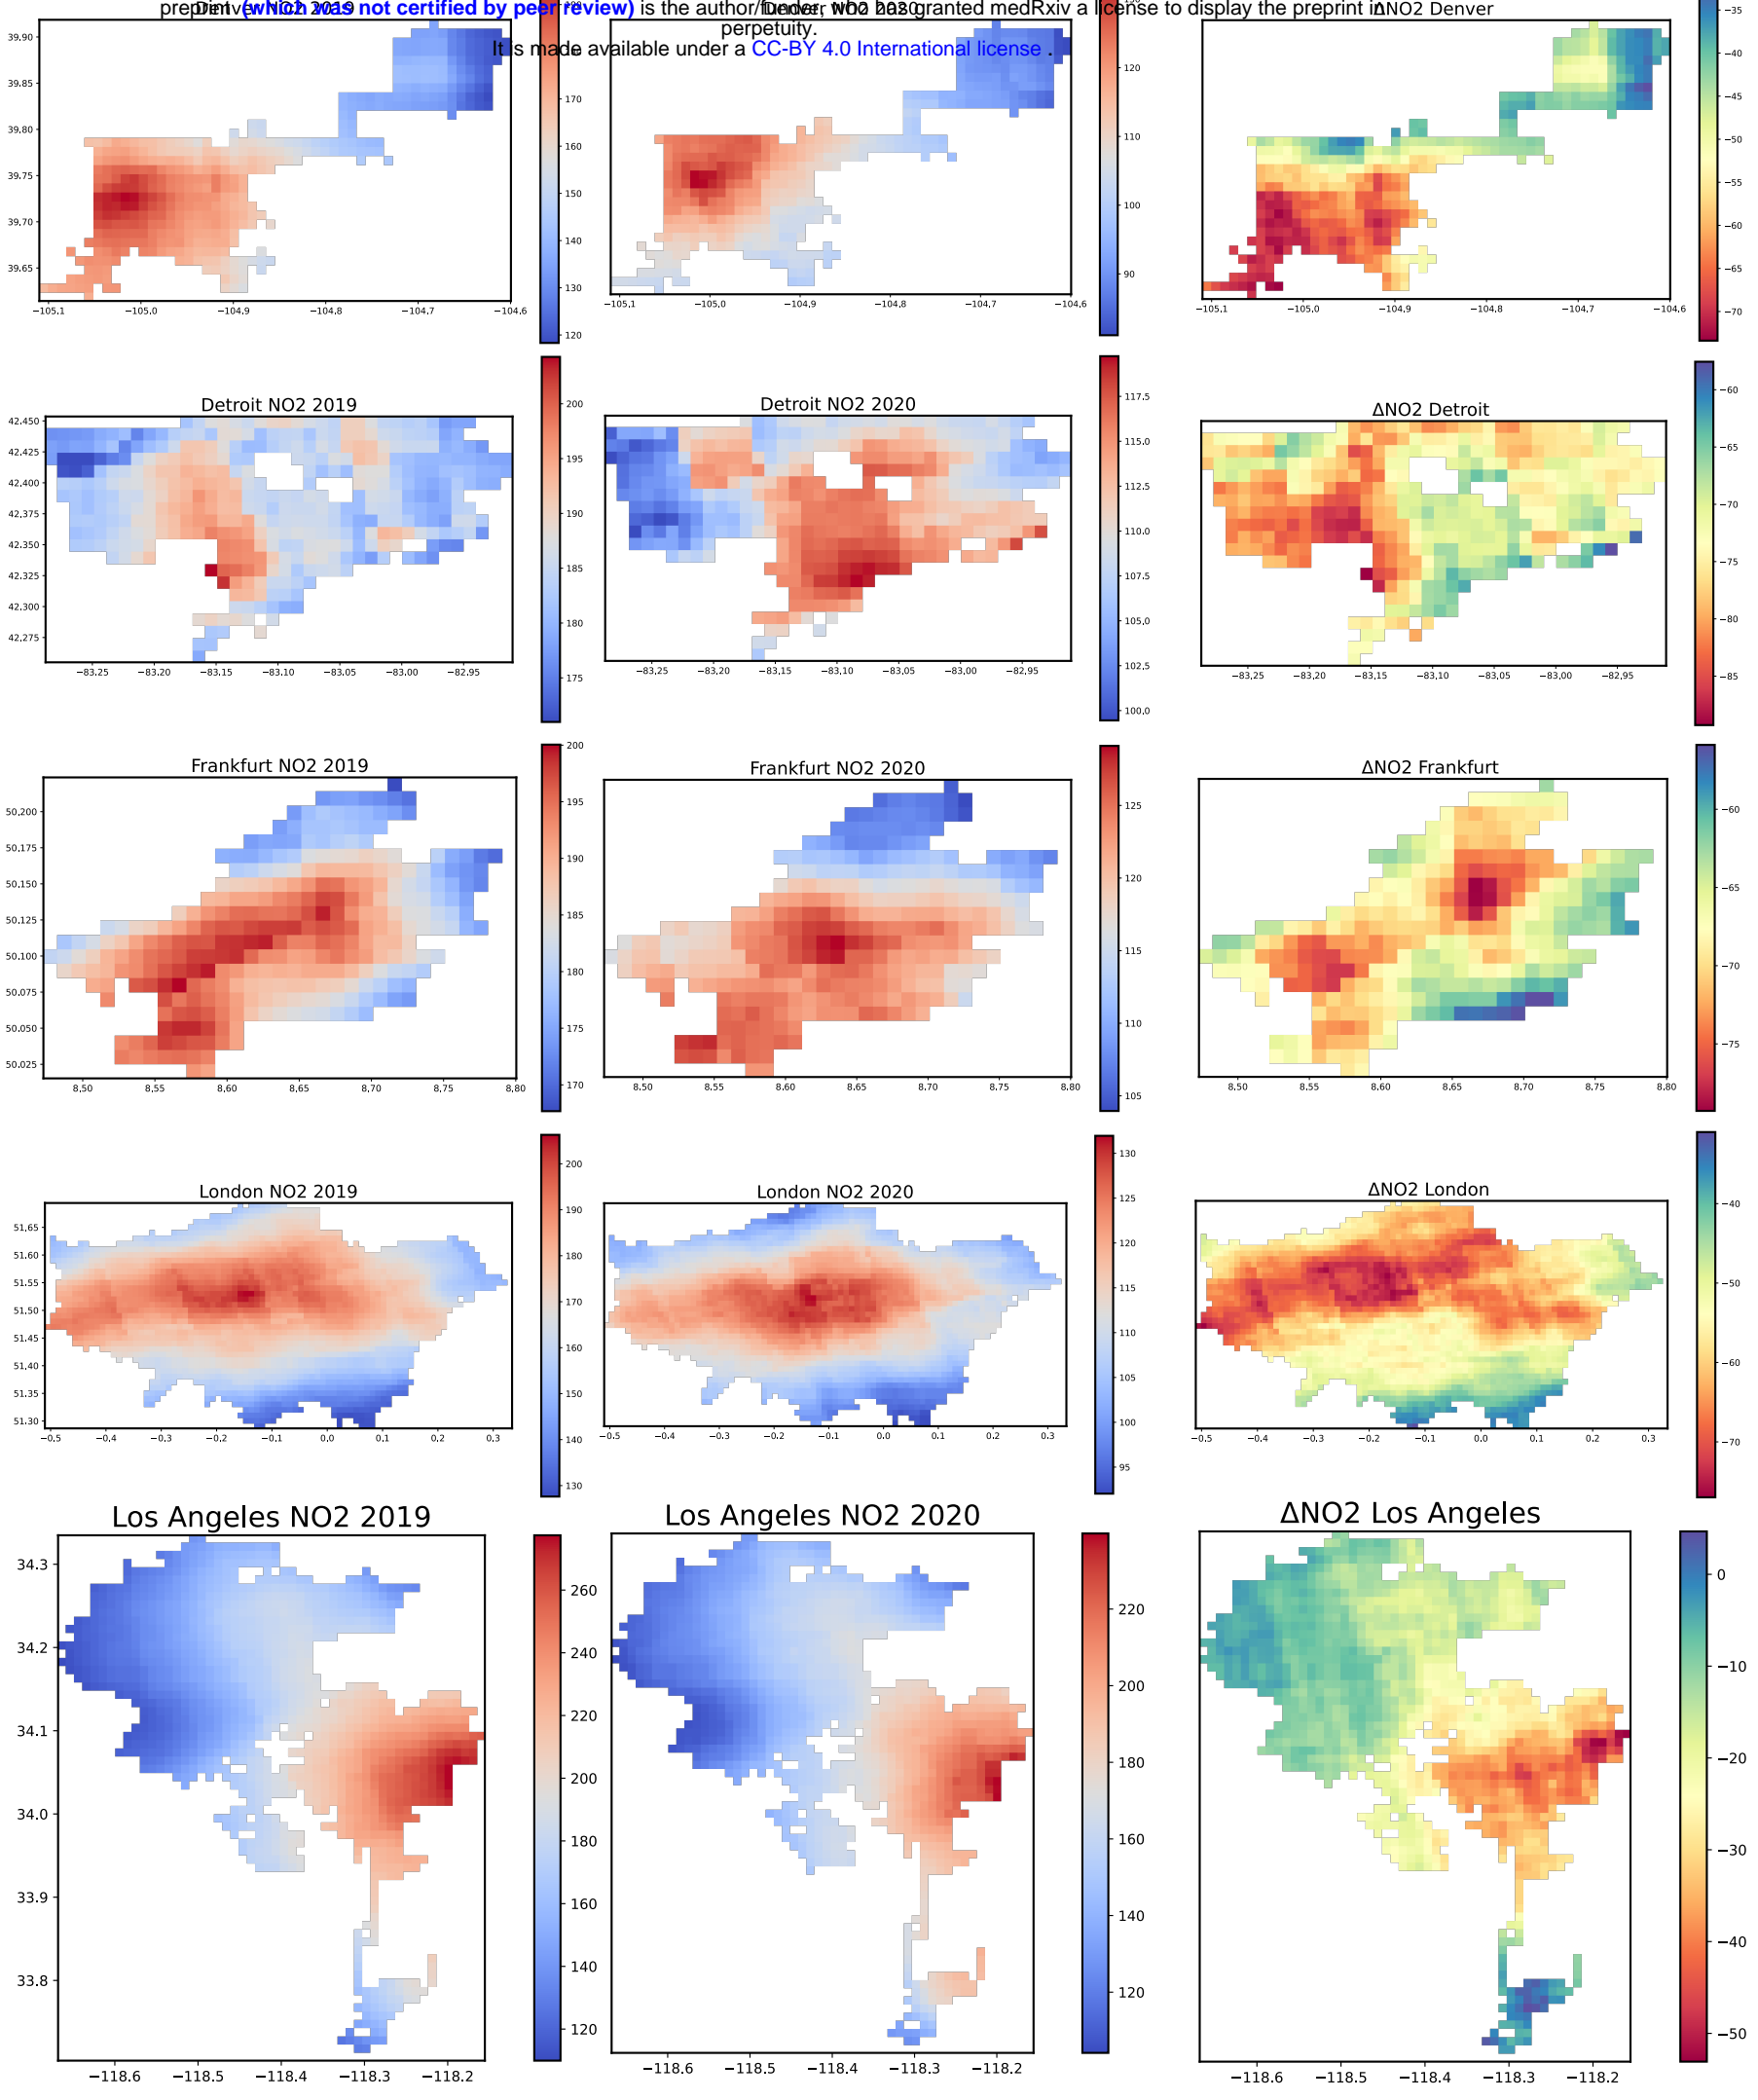

Fig. 1

Continued.....

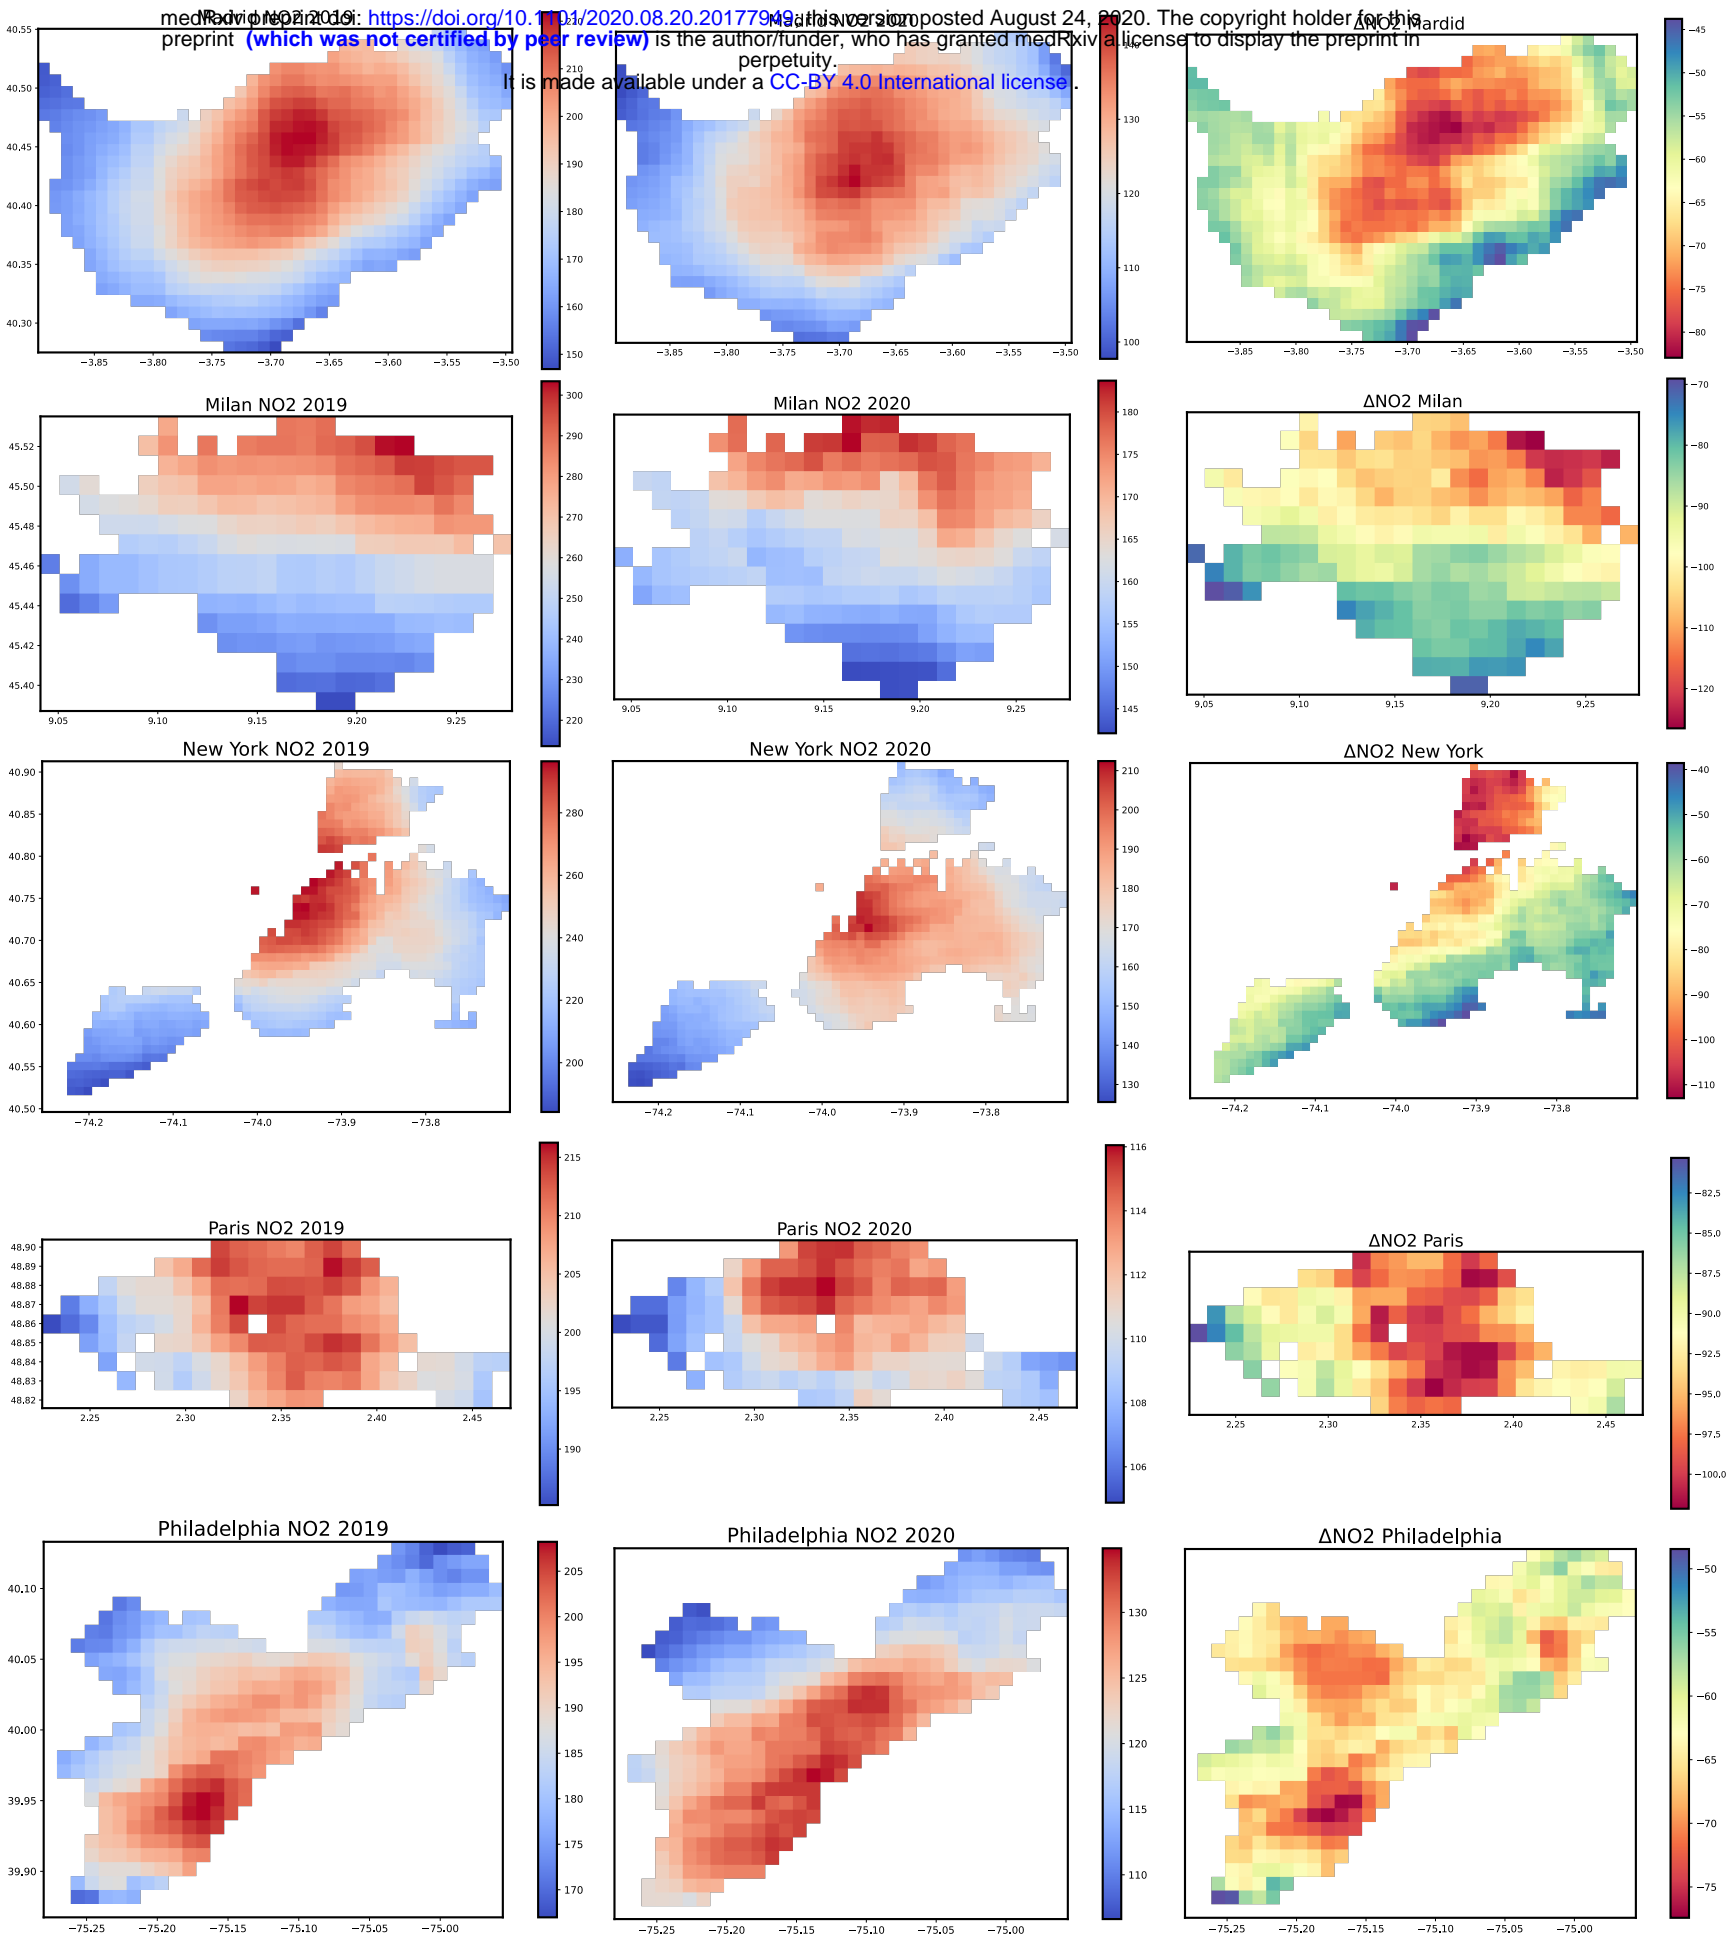

Fig. 1

Continued....

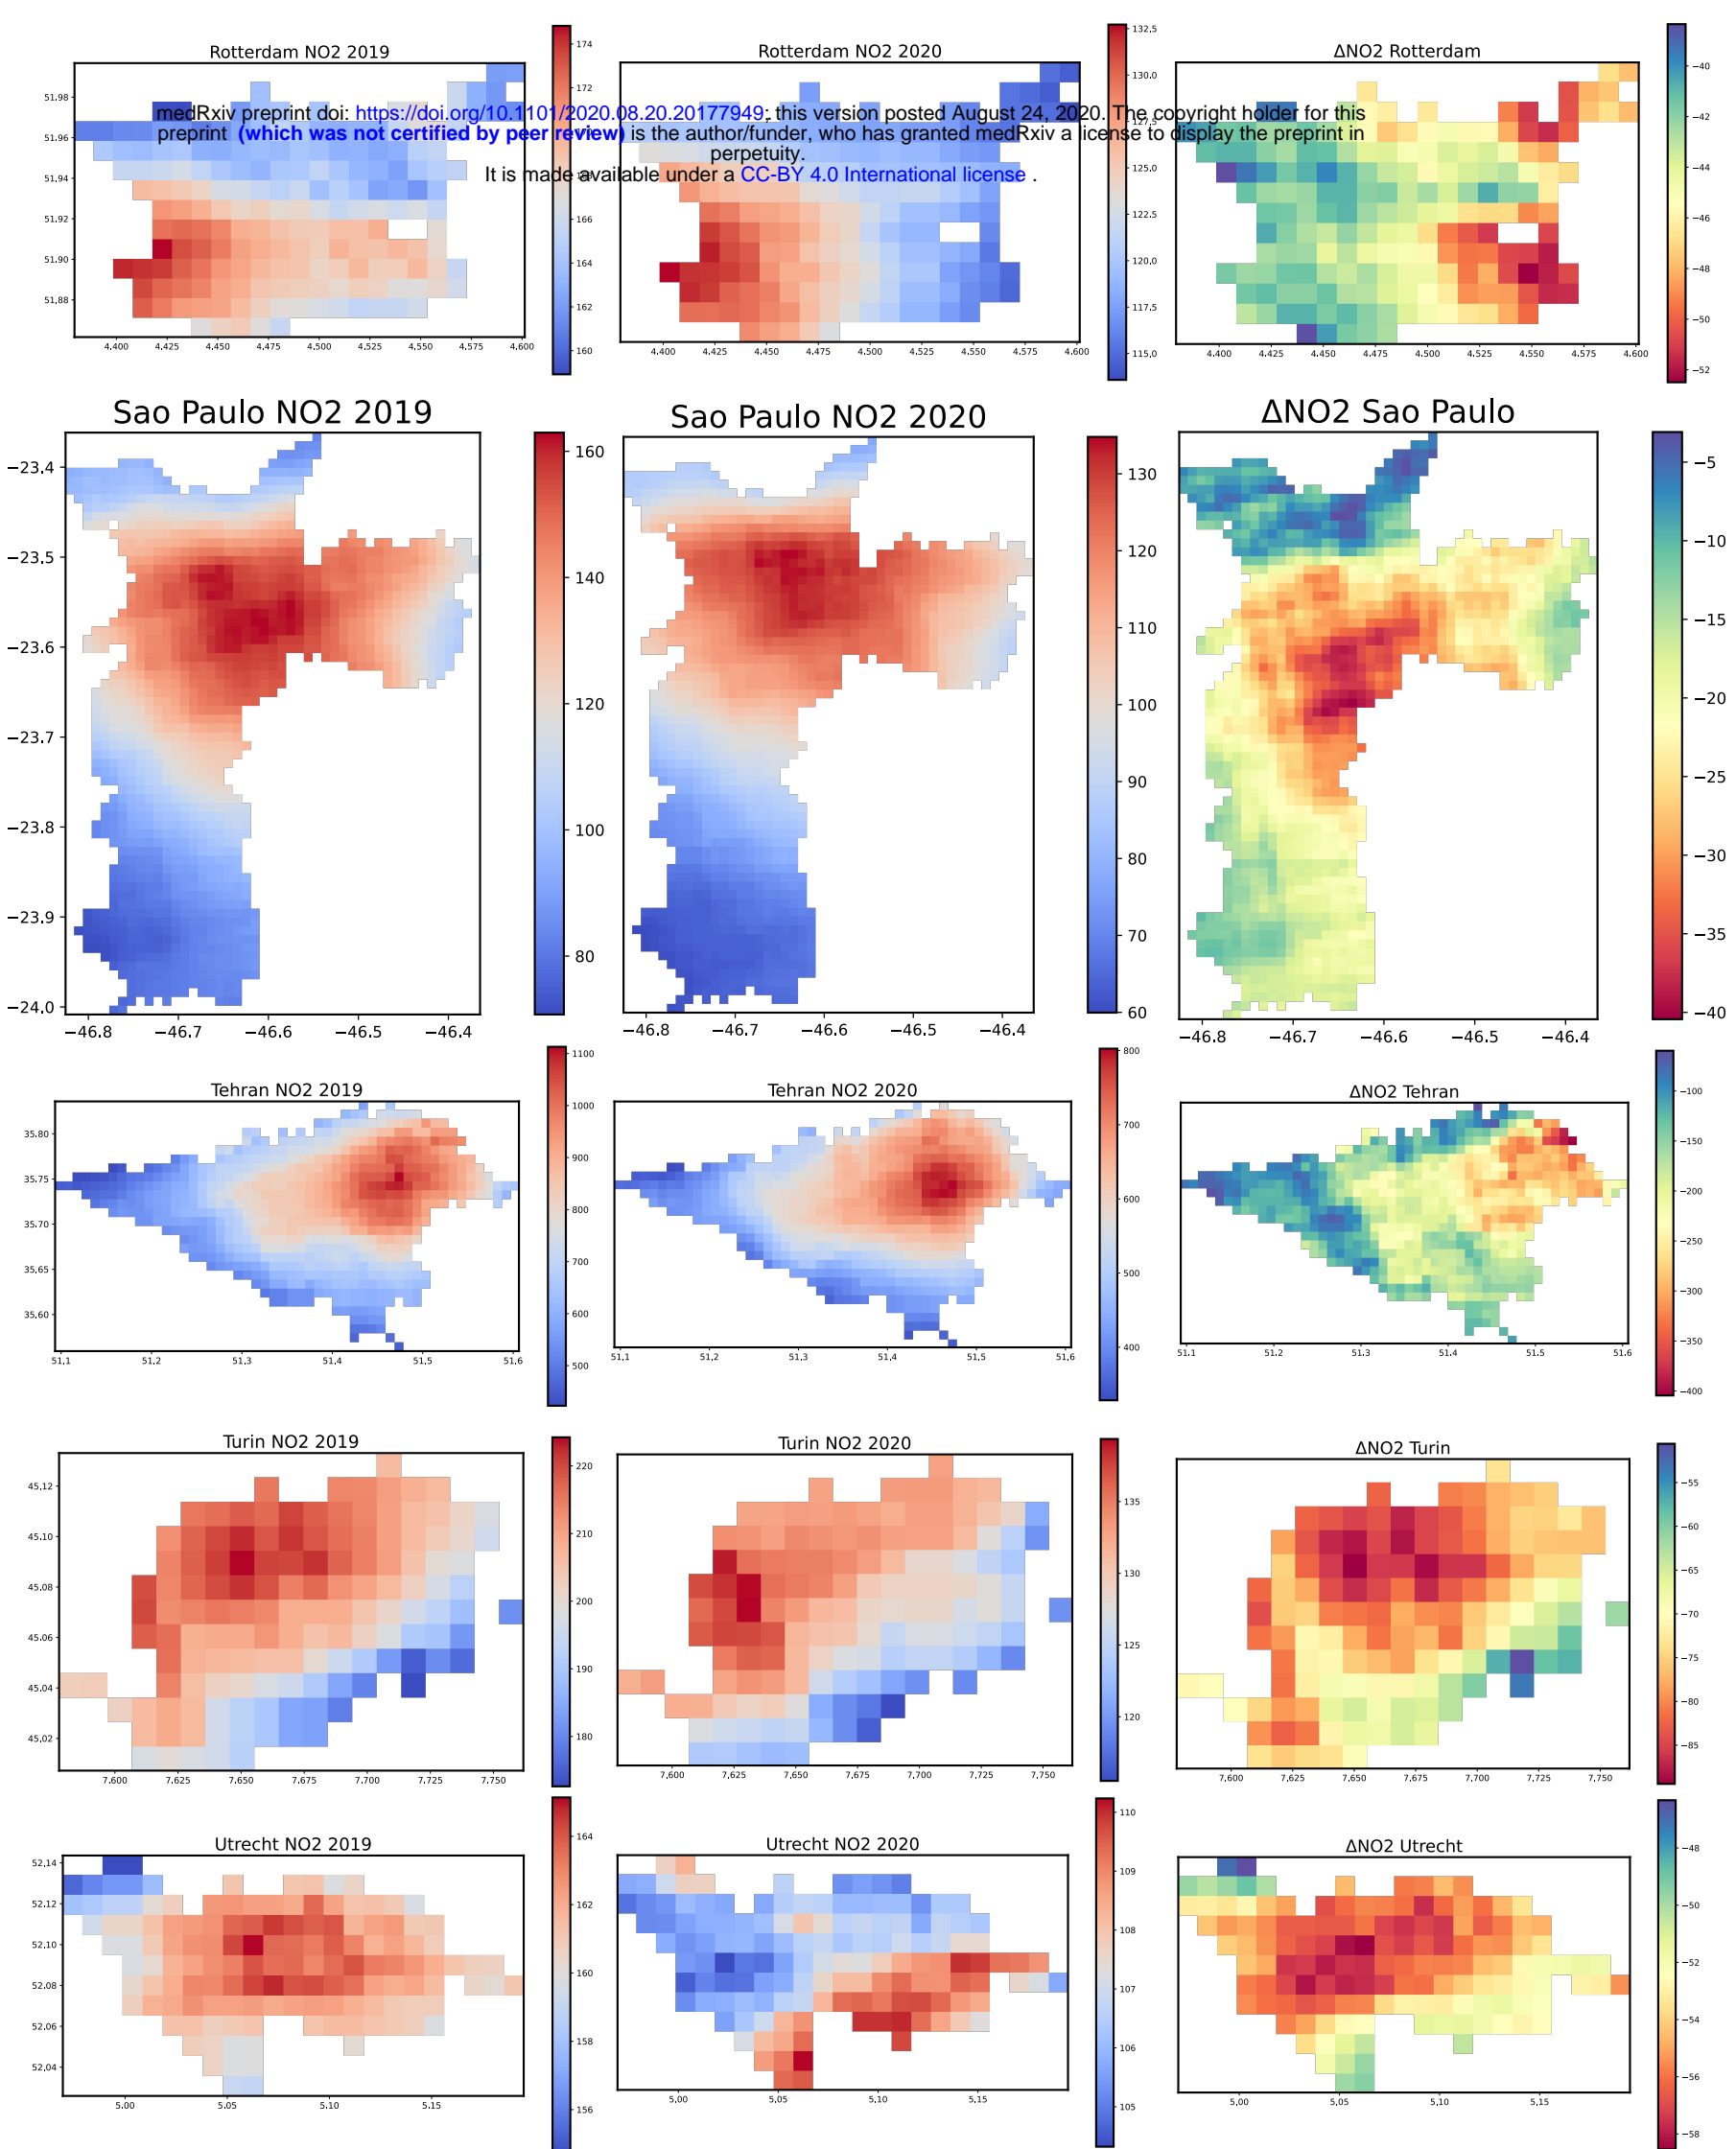

**Fig.1** Spatial distribution and changes in NO<sub>2</sub> concentration (μmol/m<sup>2</sup>) derived from Sentinel 5P TROPOMI data.

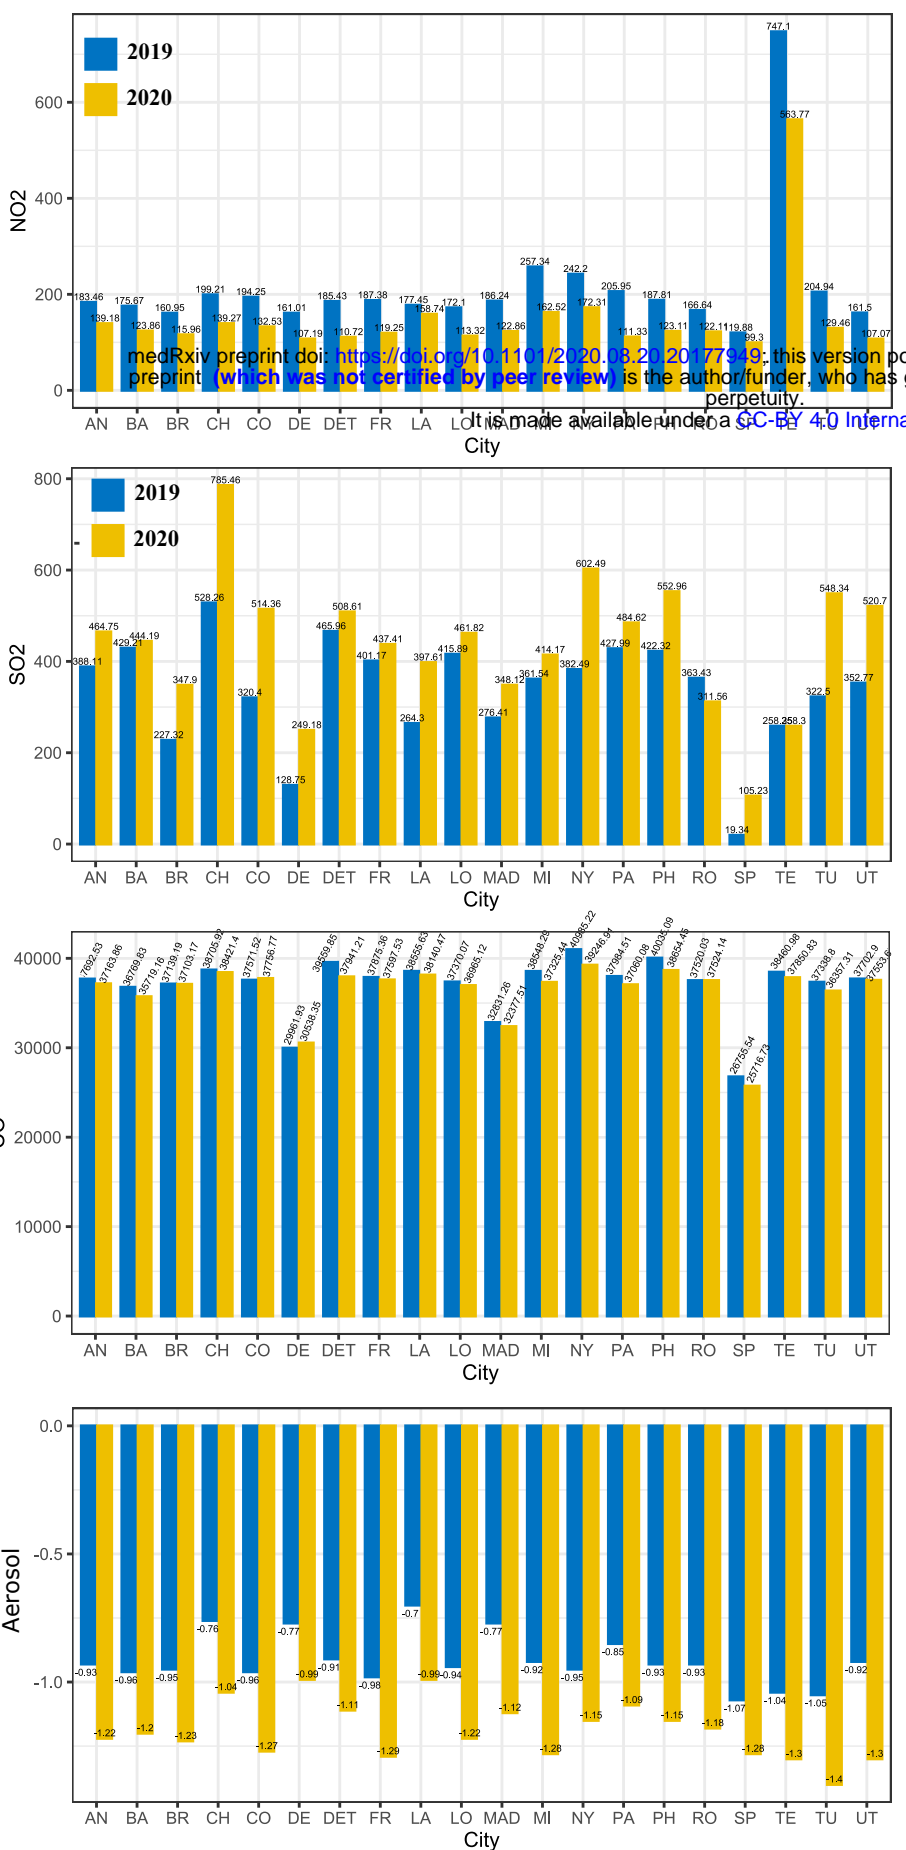

**Fig. 2** Concentration ( $\mu\text{mol}/\text{m}^2$ ) of air pollutants during the study period (1st Feb to 11th May) in 2019 and 2020.

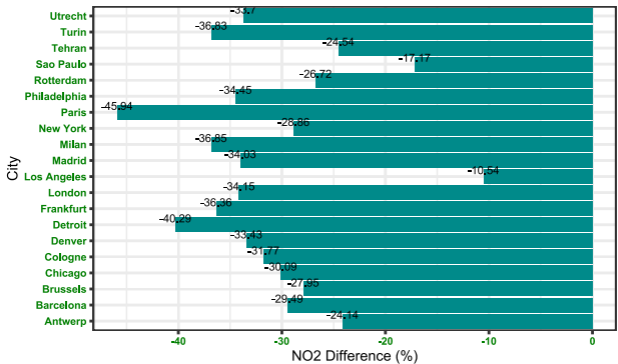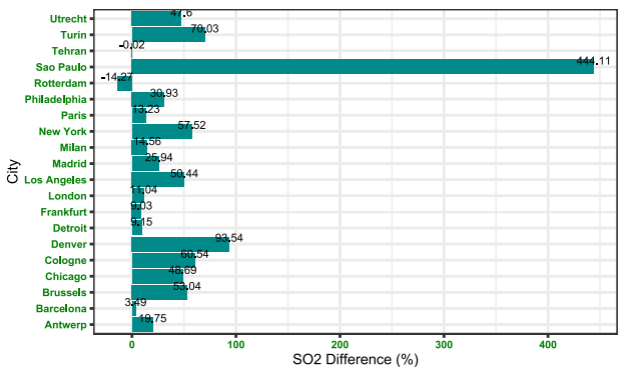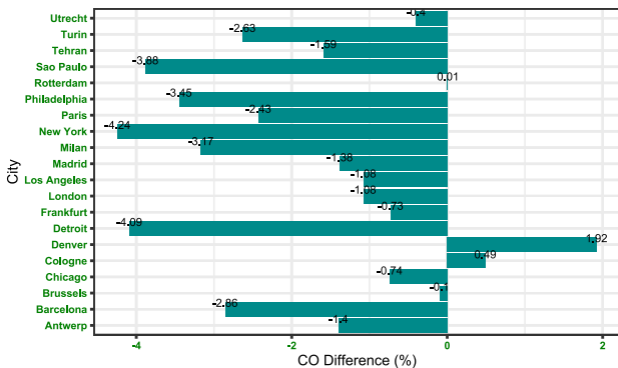

**Fig. 3** Changes (%) in air pollution during the study period.

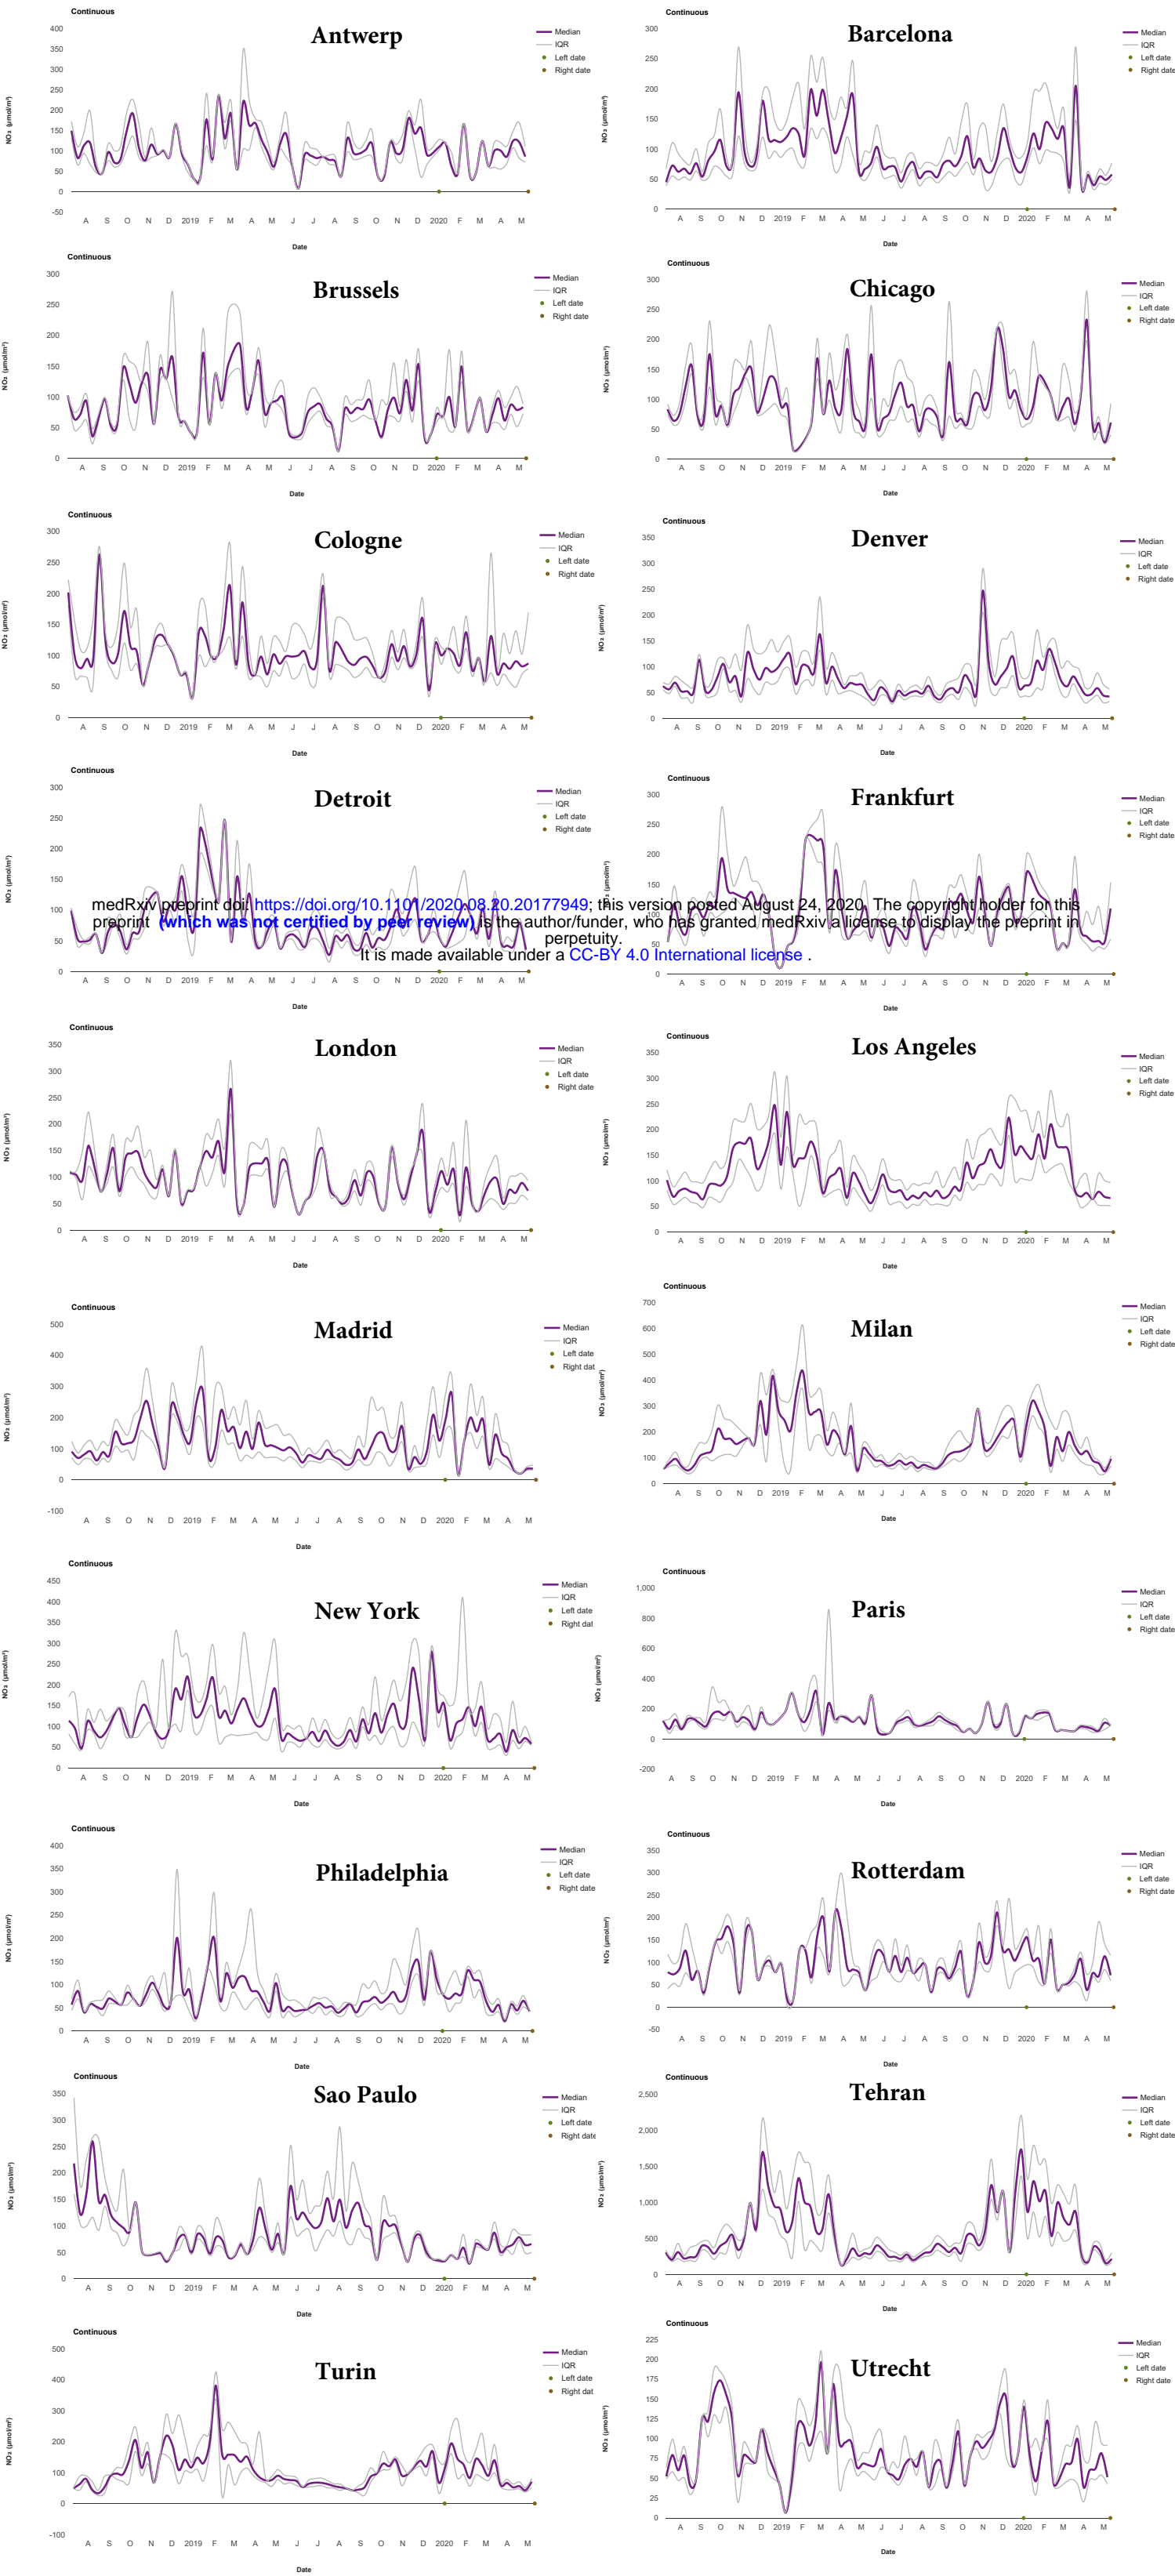

**Fig. 4** Monthly variation of  $\text{NO}_2$  ( $\mu\text{mol m}^{-2}$ ) concentration in the selected cities from August 2018 to May 2020 derived from Sentinel 5P TROPOMI observation.



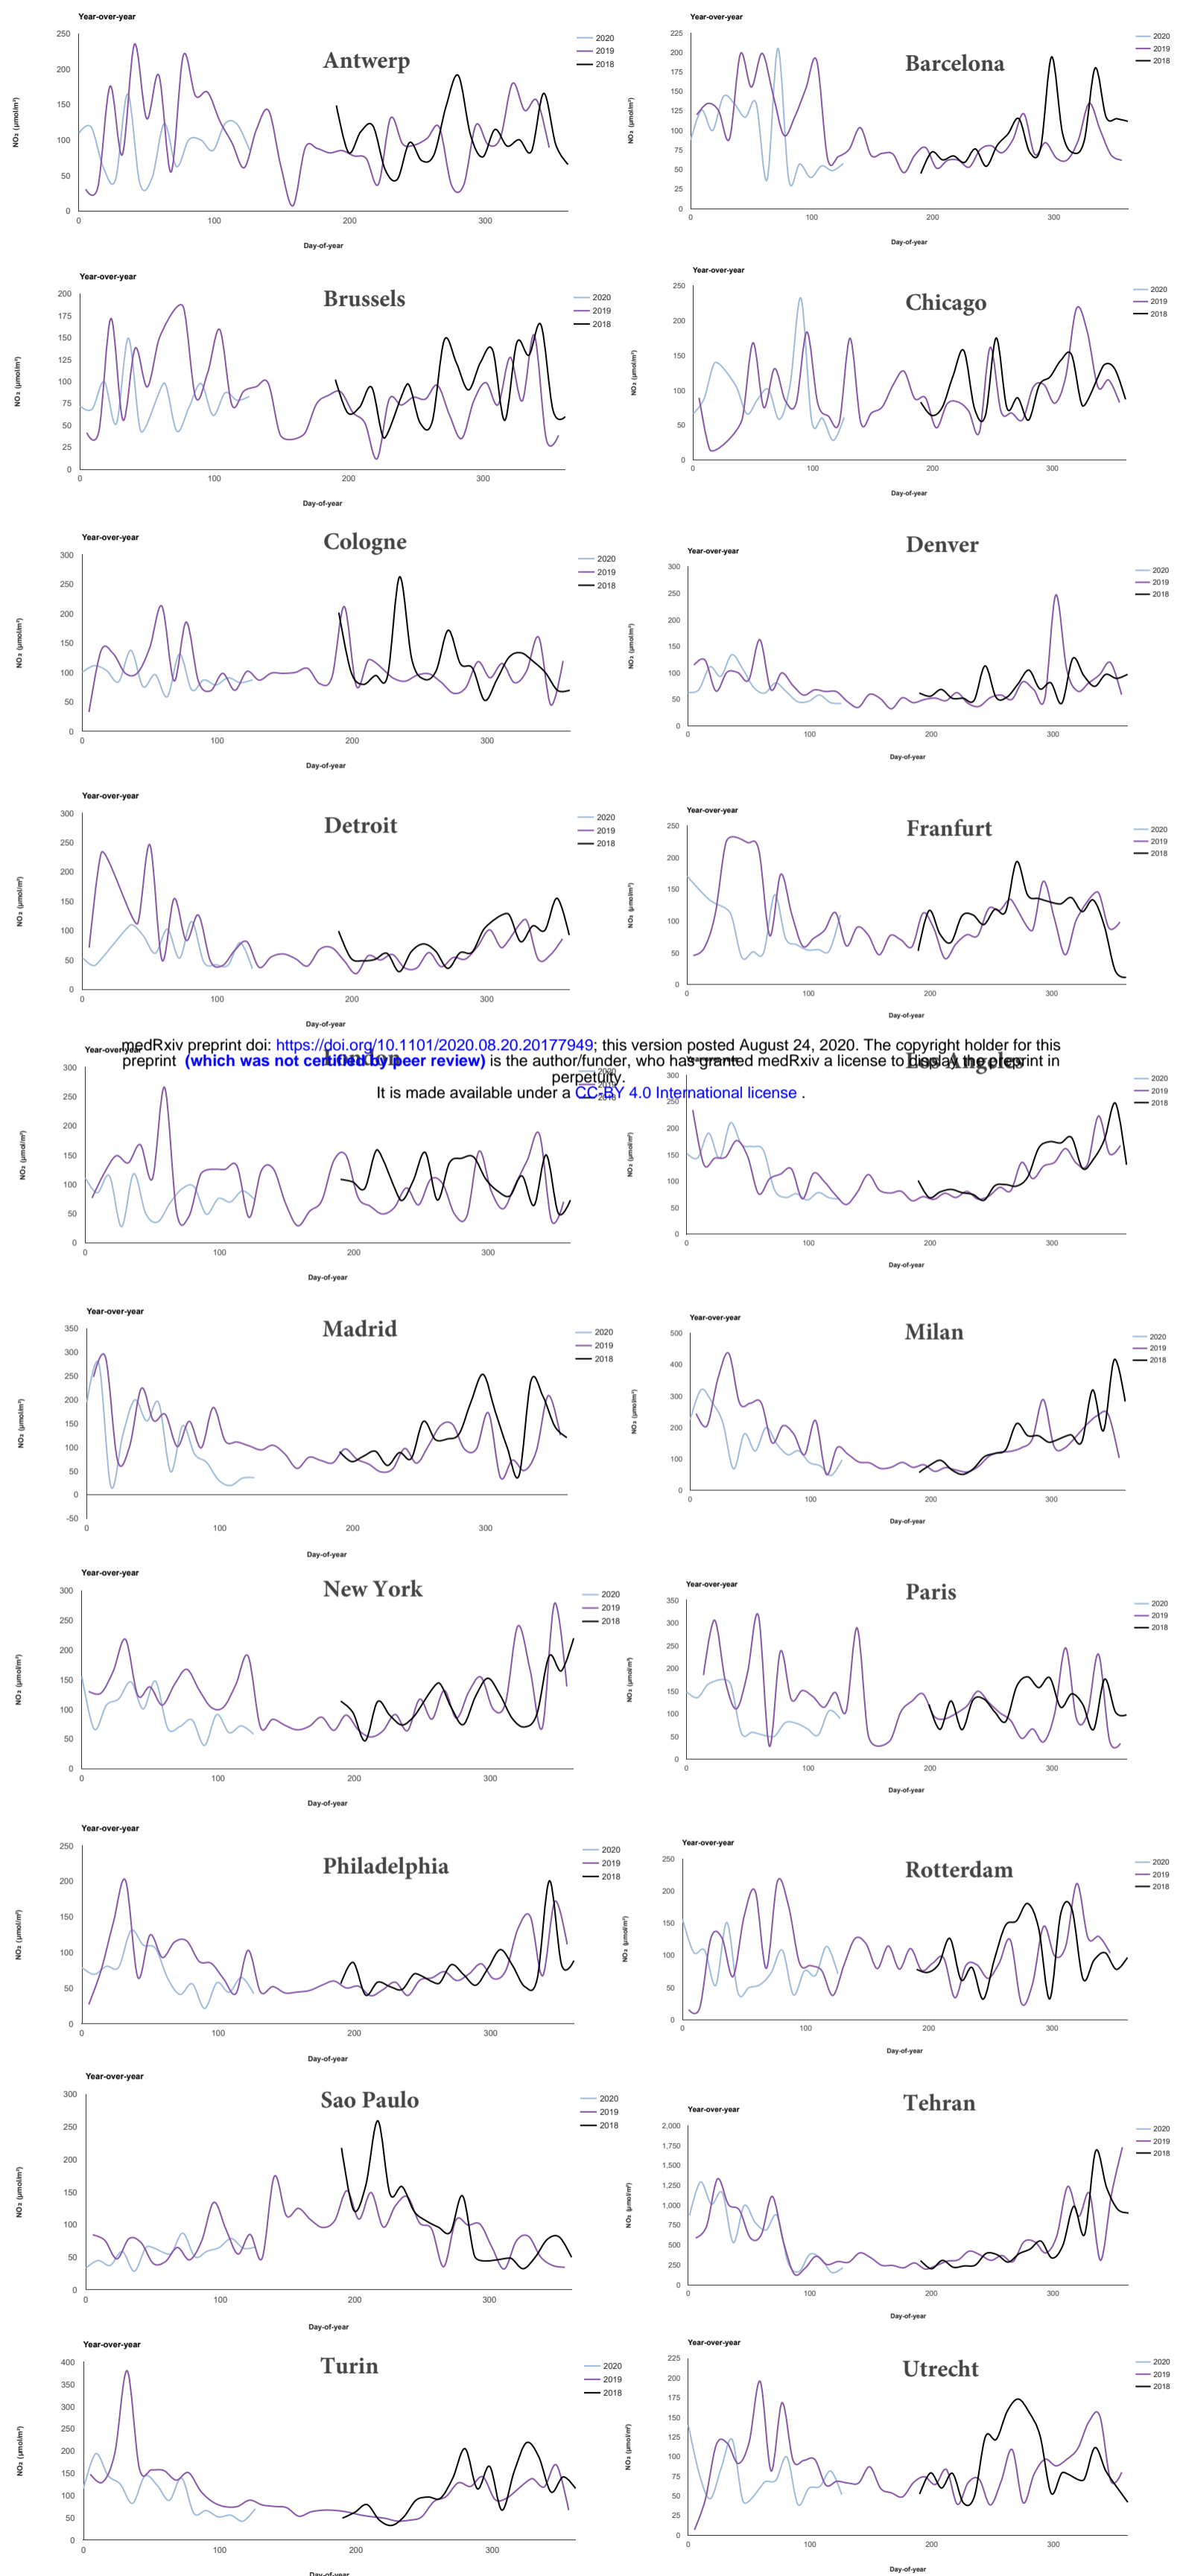

**Fig. 5** Yearly variation of  $\text{NO}_2$  ( $\mu\text{mol m}^{-2}$ ) concentration in the selected cities in 2018, 2019, and 2020 derived from Sentinel 5P TROPOMI observation.

# Daily Air Quality Index values - PM<sub>2.5</sub>

# Cumulative Number of good PM<sub>2.5</sub> AQI days

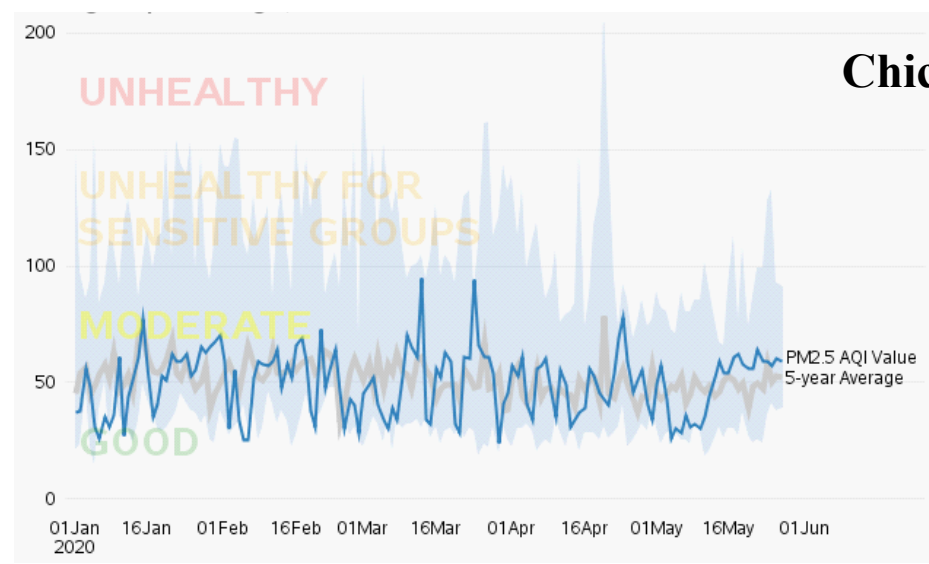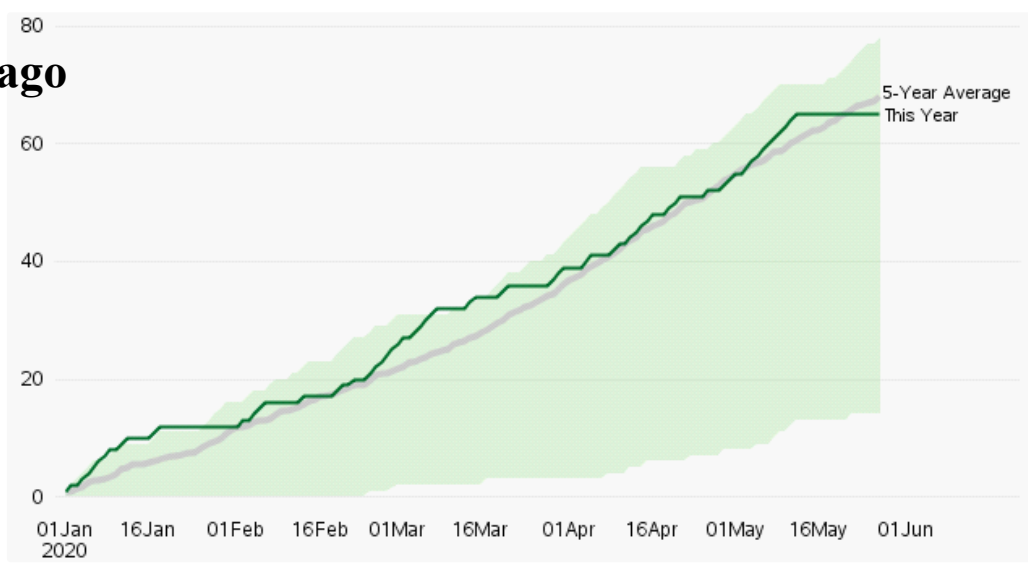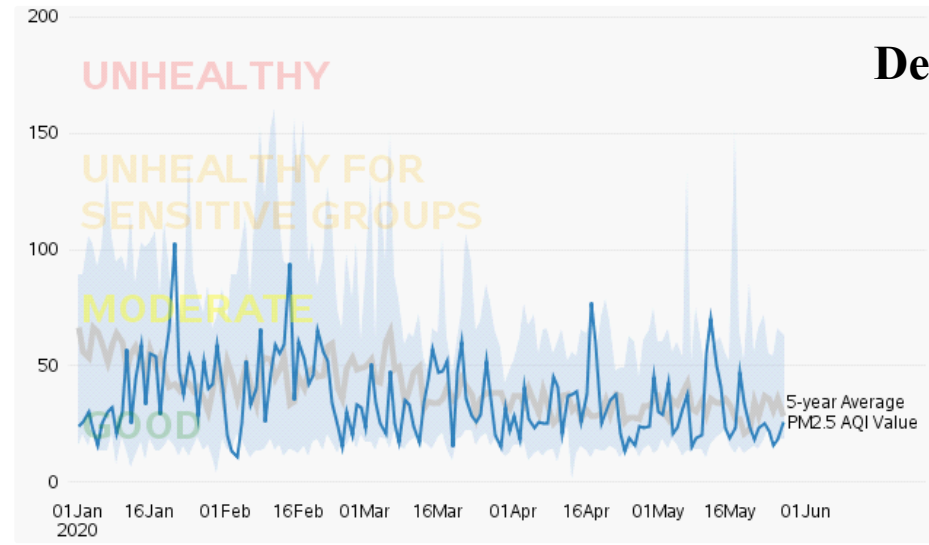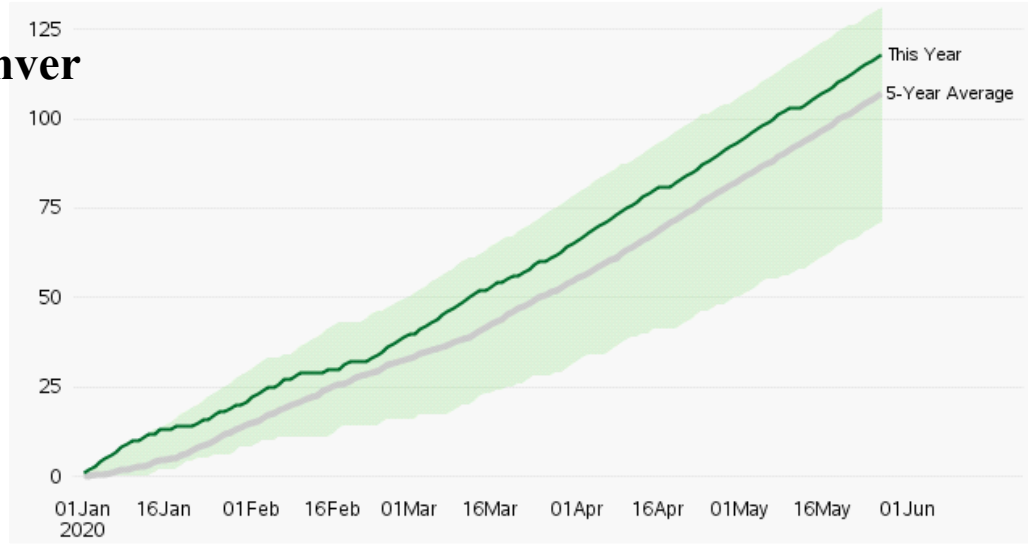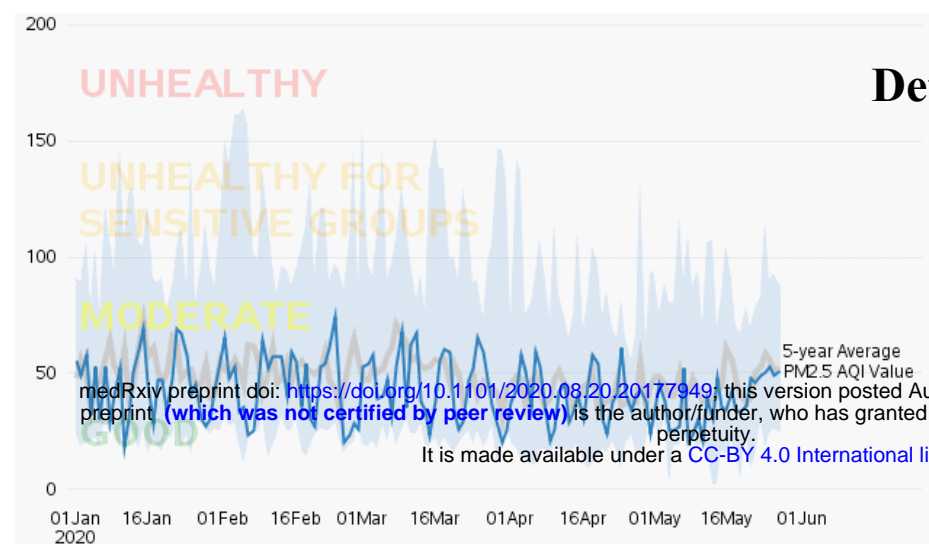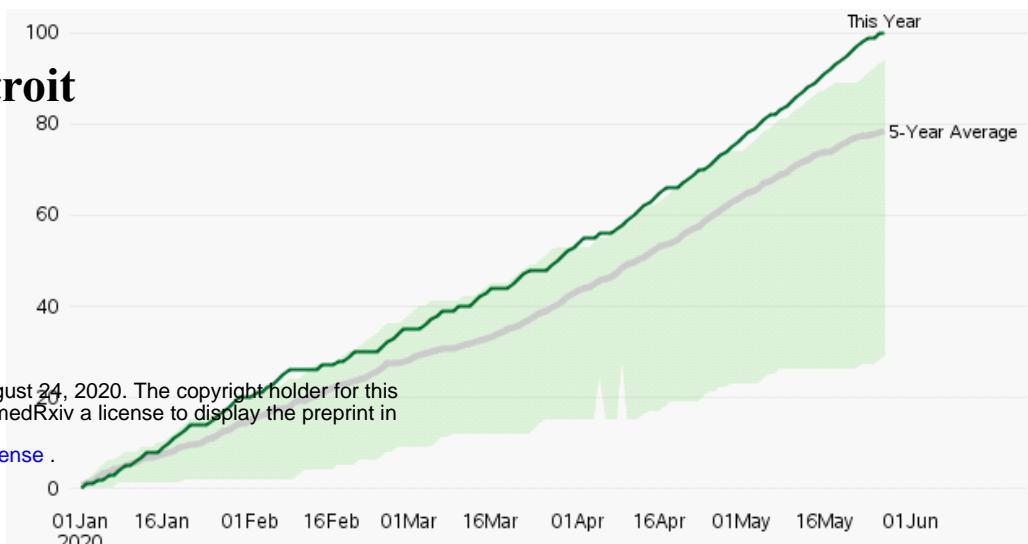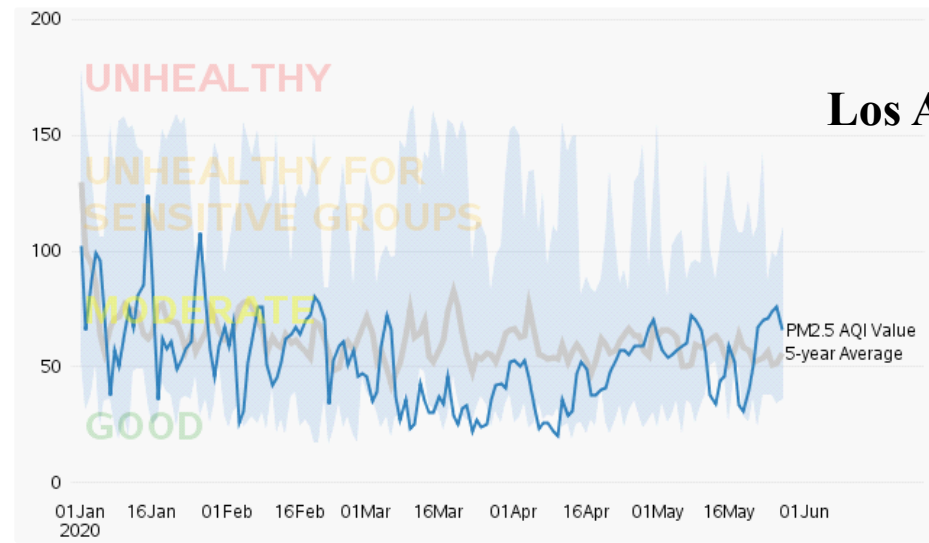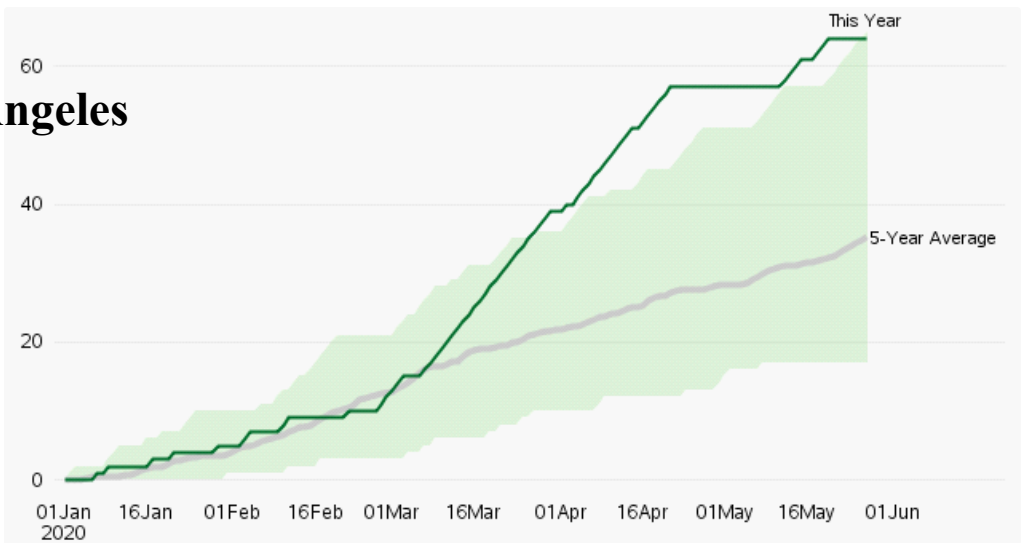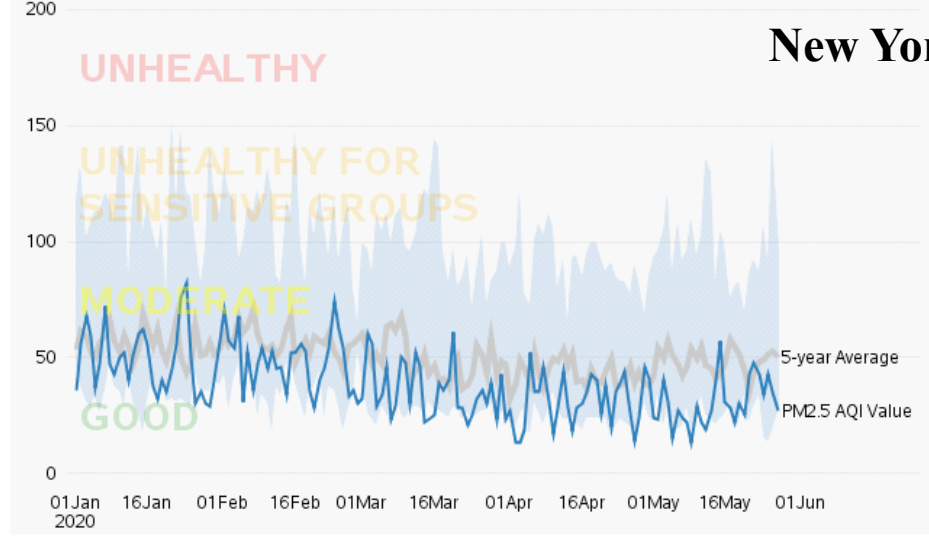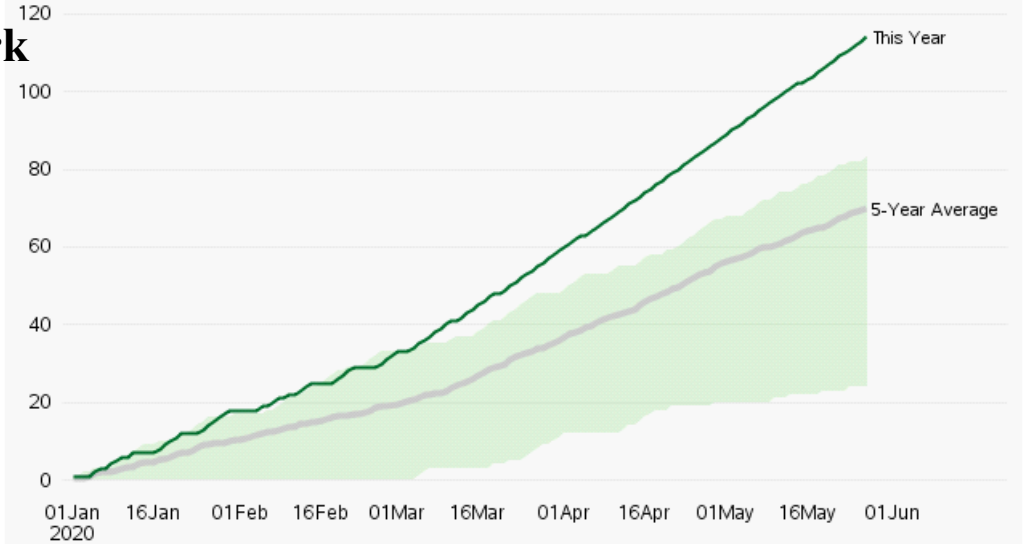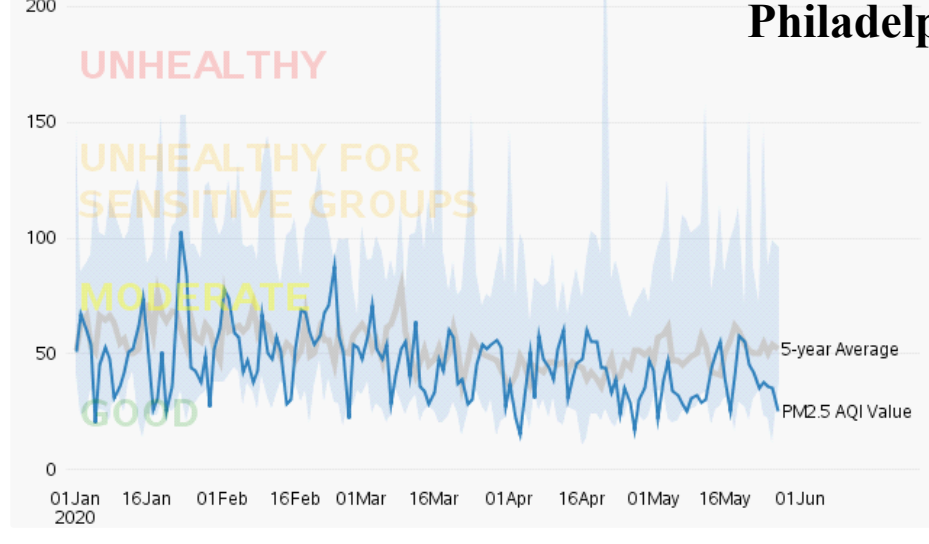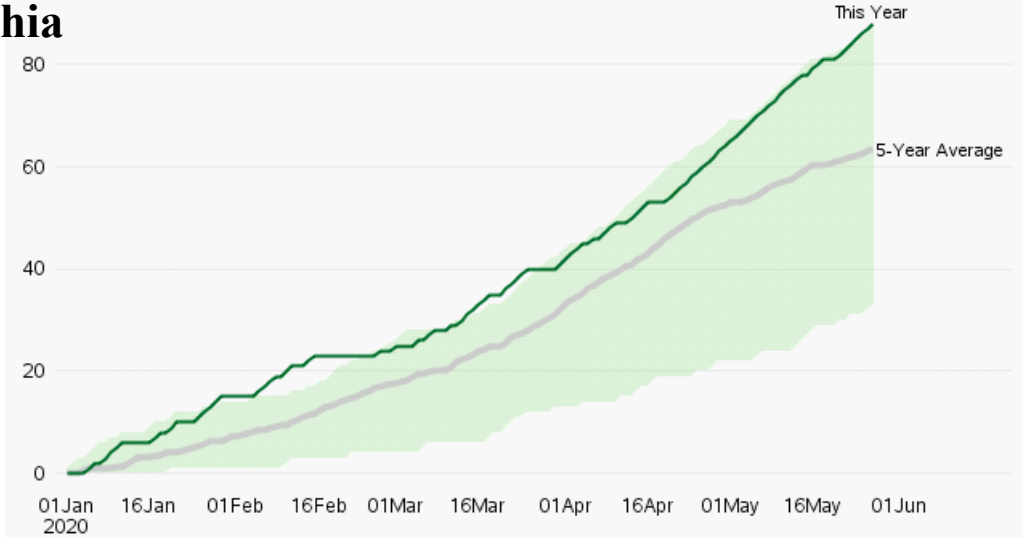

medRxiv preprint doi: <https://doi.org/10.1101/2020.08.20.20177949>; this version posted August 24, 2020. The copyright holder for this preprint (which was not certified by peer review) is the author/funder, who has granted medRxiv a license to display the preprint in perpetuity. It is made available under a [CC-BY 4.0 International license](https://creativecommons.org/licenses/by/4.0/).

**Fig. 6** Shows the ground data based PM<sub>2.5</sub> air quality index values for the selected cities. Figures in left panel shows the 20 years (2000 - 2019) air quality index values, 5 years average (2015 - 2019) and most recent PM<sub>2.5</sub> air quality index values of the selected cities. The maps on the right panel shows recent (green color) and 5 years average (gray color) cumulative number of good PM<sub>2.5</sub> air quality index days for the selected cities. Maps in both panel are indicating the improving status of air quality in the selected cities.

## Chicago

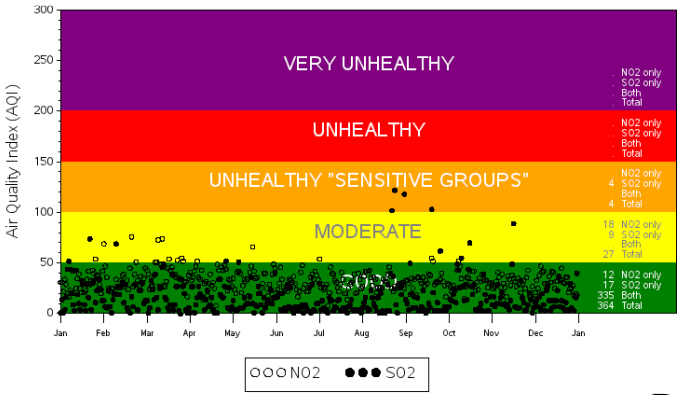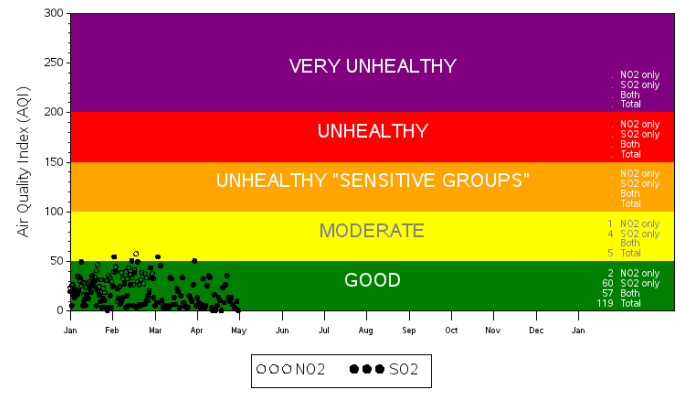

## Denver

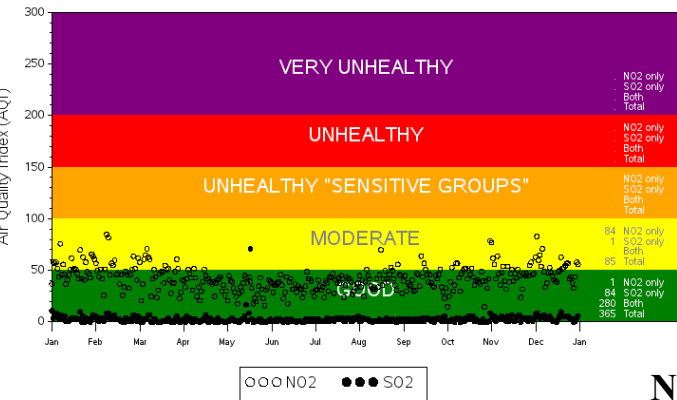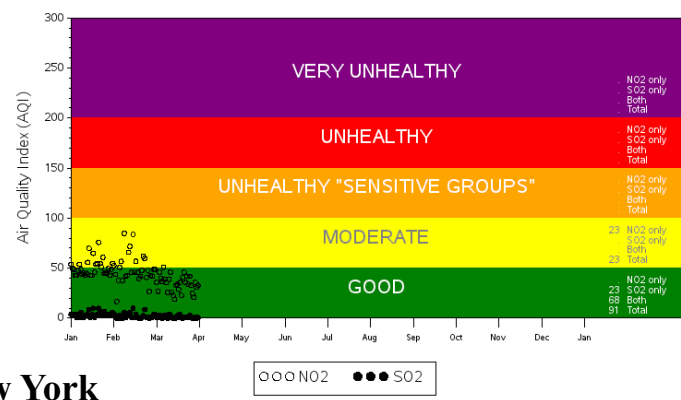

## New York

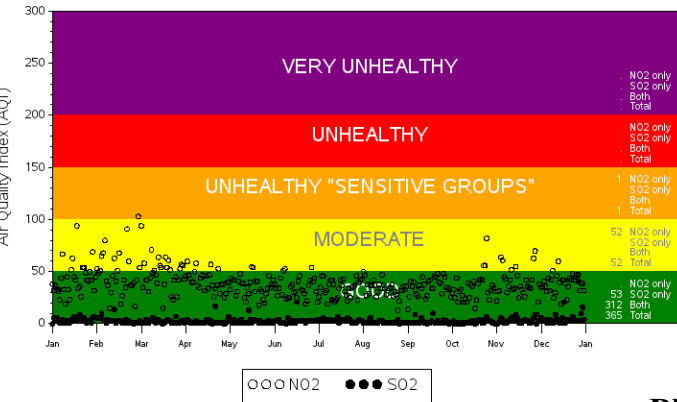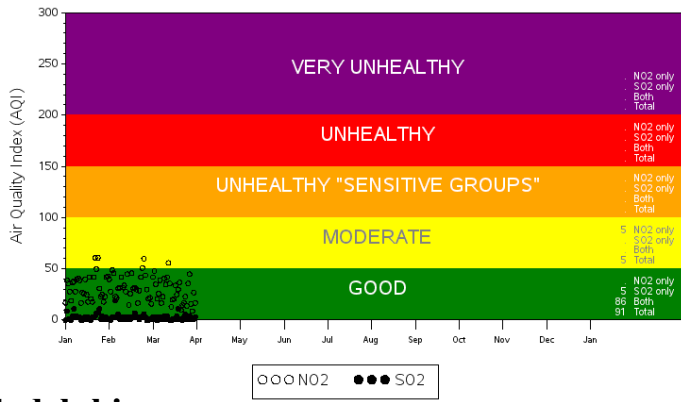

## Philadelphia

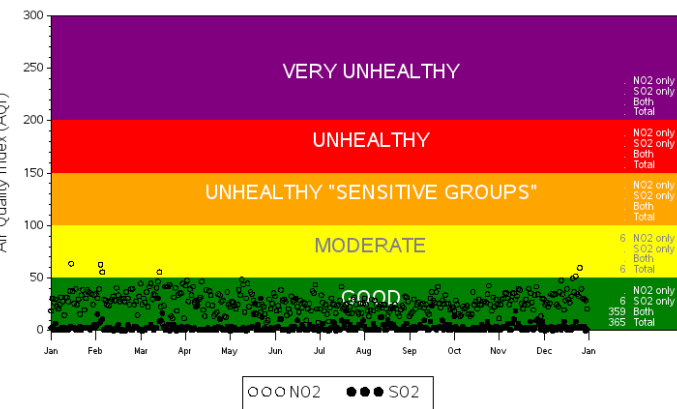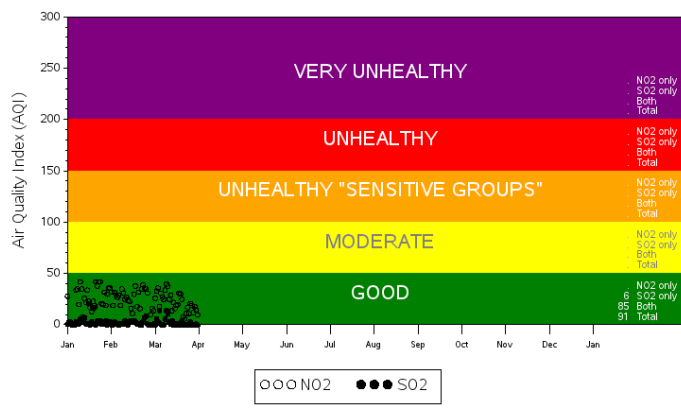

**Fig. 7** Shows the ground monitored air quality index values of NO<sub>2</sub> and SO<sub>2</sub> in 2019 and 2020 in the selected cities. In most cases, air quality has been improved substantially during the lock down period.

## Chicago

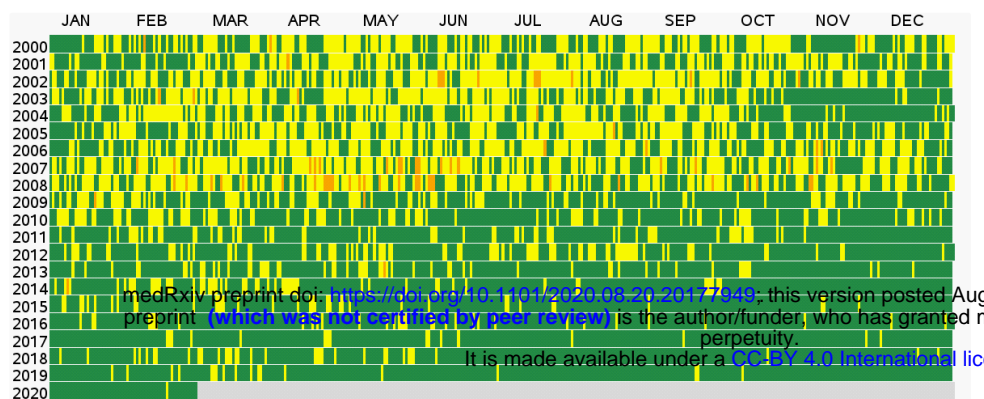

## Denver

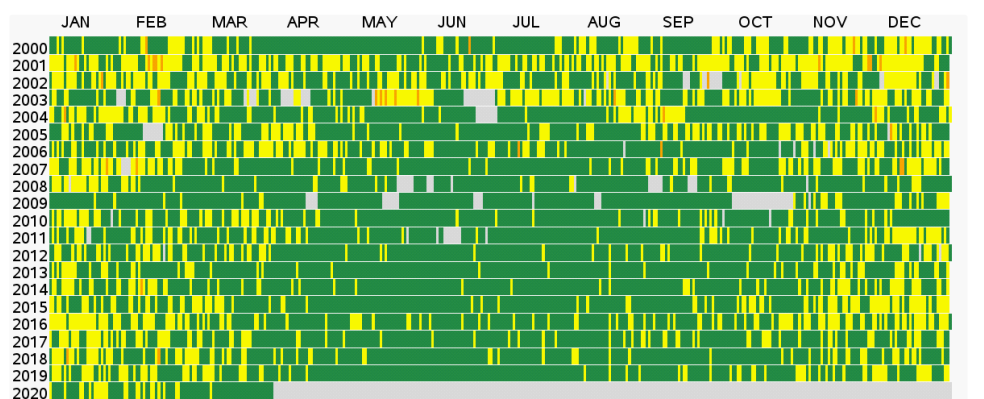

## New York

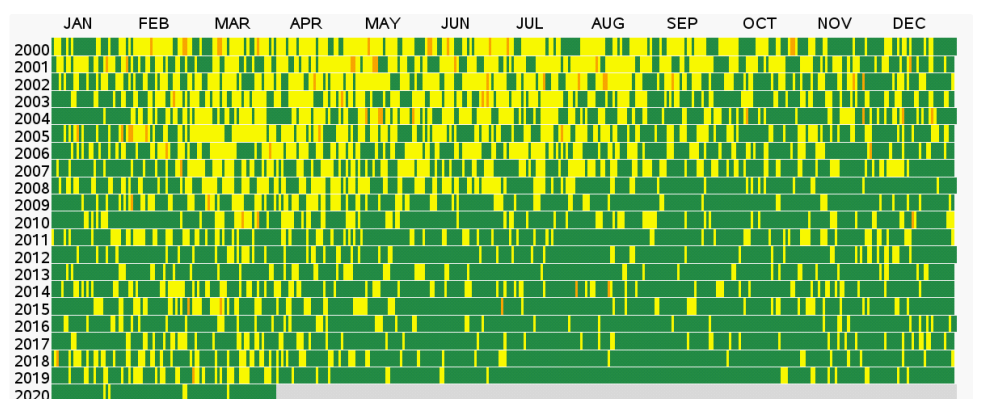

## Philadelphia

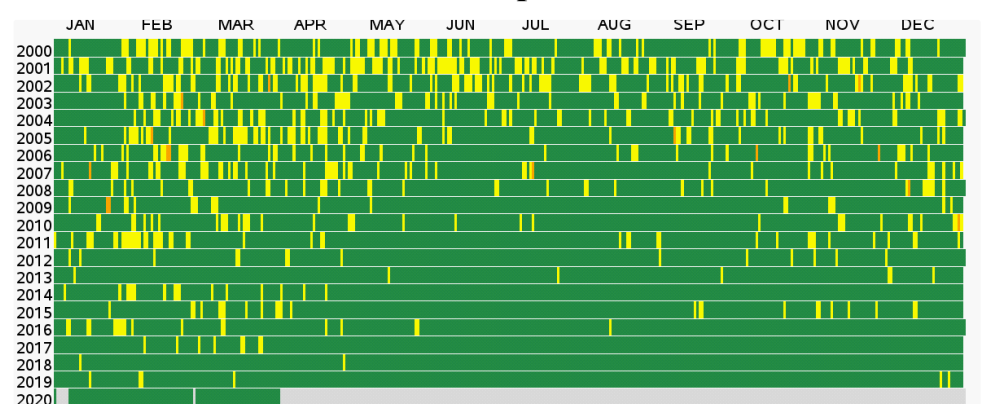

### AQI Category

- Good ( $\leq 53$  ppb)
- Moderate (54-100 ppb)
- Unhealthy for Sensitive Groups (101-360 ppb)
- Unhealthy (361-649 ppb)
- Very Unhealthy (650-1249 ppb)
- Hazardous ( $\geq 1250$  ppb)

**Fig. 8** Multi-year daily time series plot shows the variation of air quality status ( $\text{NO}_2$ ) from 2000 to 2020. Due to lock down and associated reduction of air pollution, air quality status is improved in all the selected cities in USA.

## Chicago

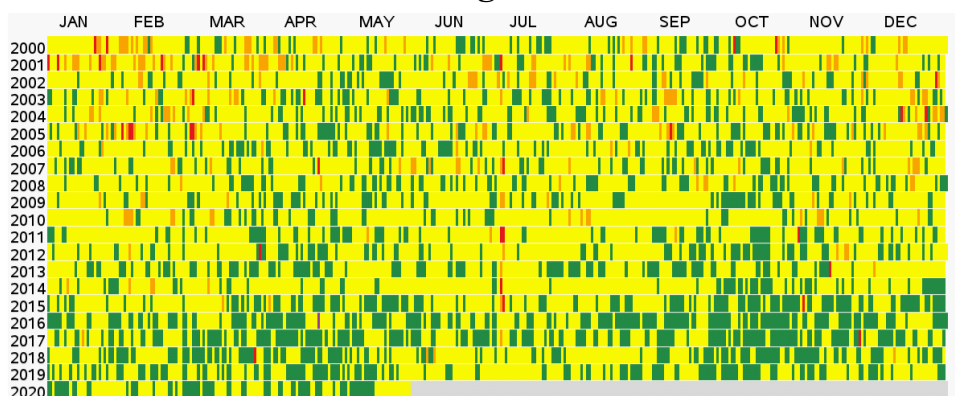

## Denver

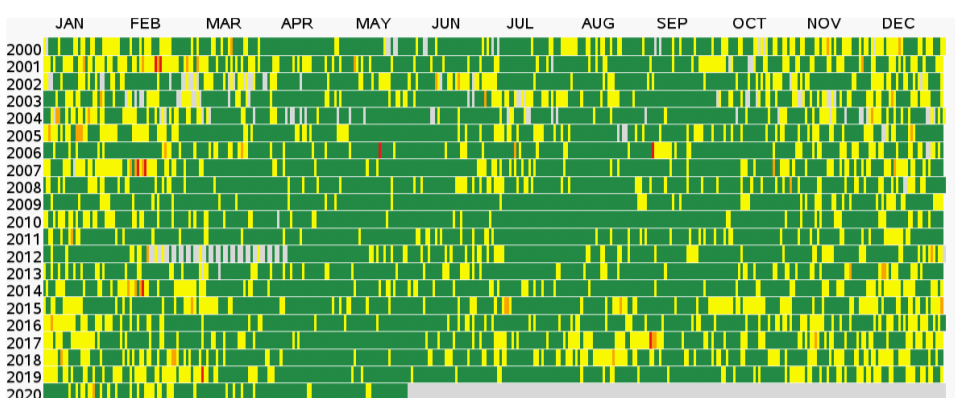

## Detroit

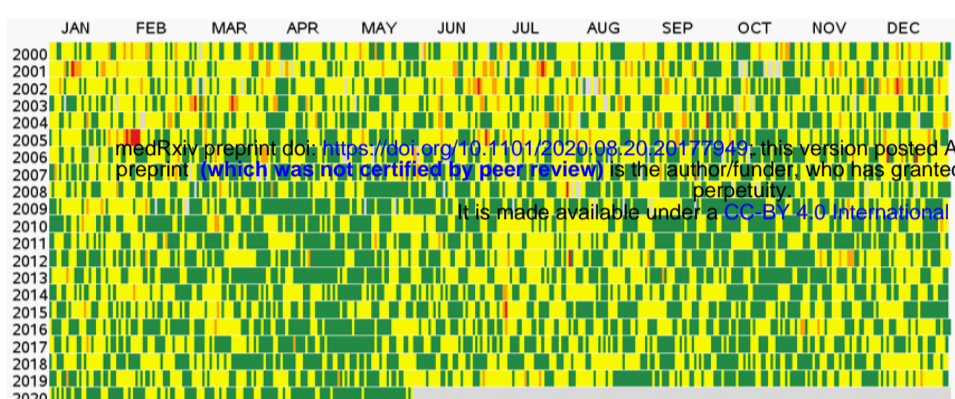

## Los Angeles

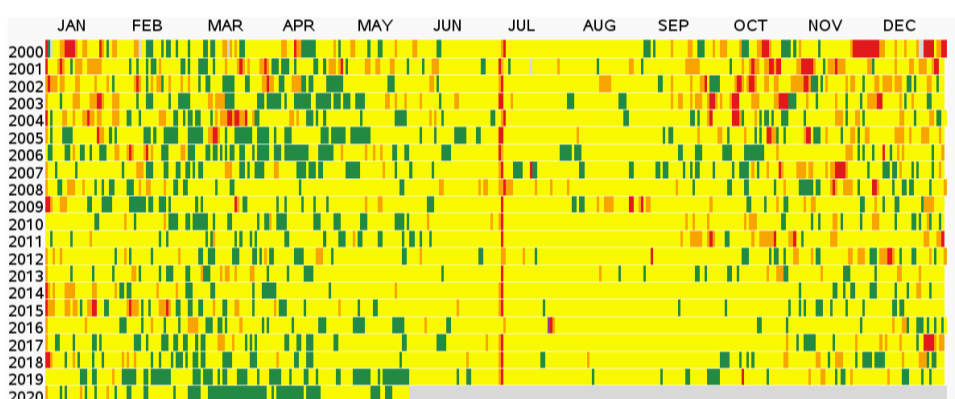

## New York

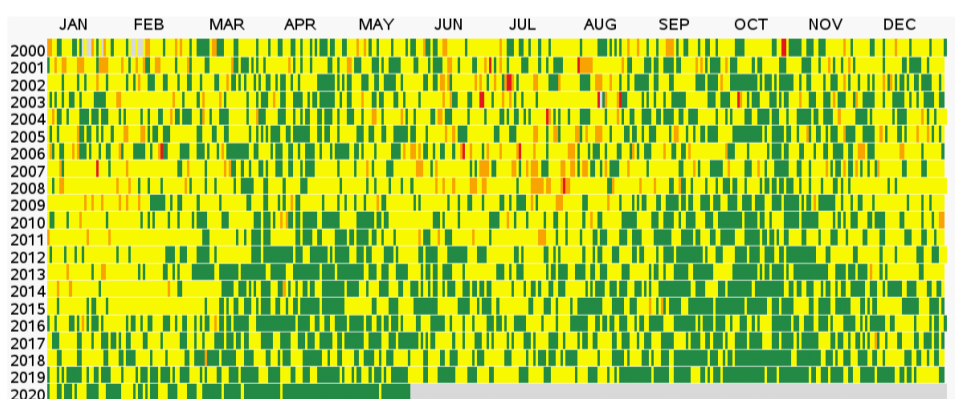

## Philadelphia

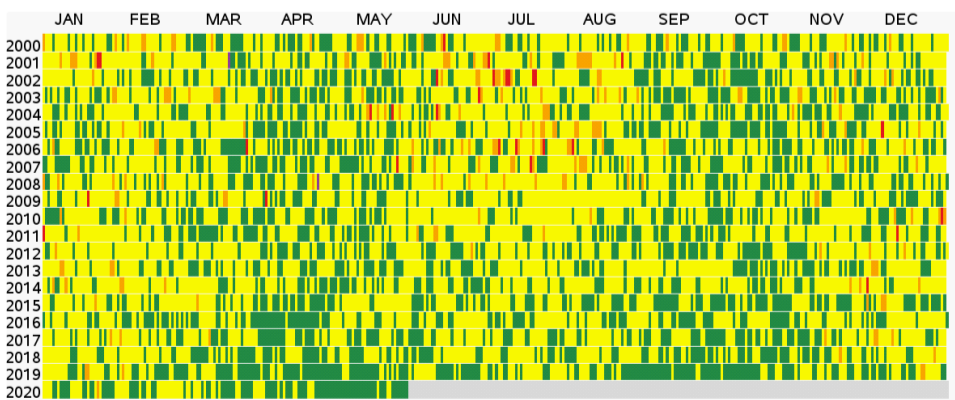

### AQI Category

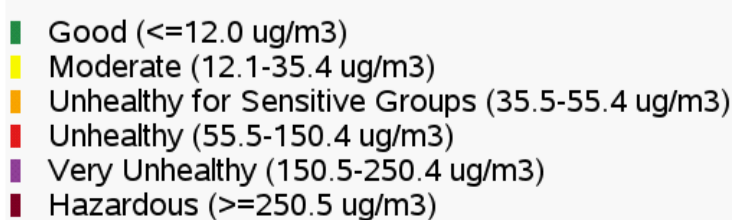

**Fig. 9** Multi-year daily time series plot shows the variation of air quality status ( $PM_{2.5}$ ) from 2000 to 2020. Due to lock down and associated reduction of air pollution, air quality status is improved in all the selected cities in USA.

## Chicago

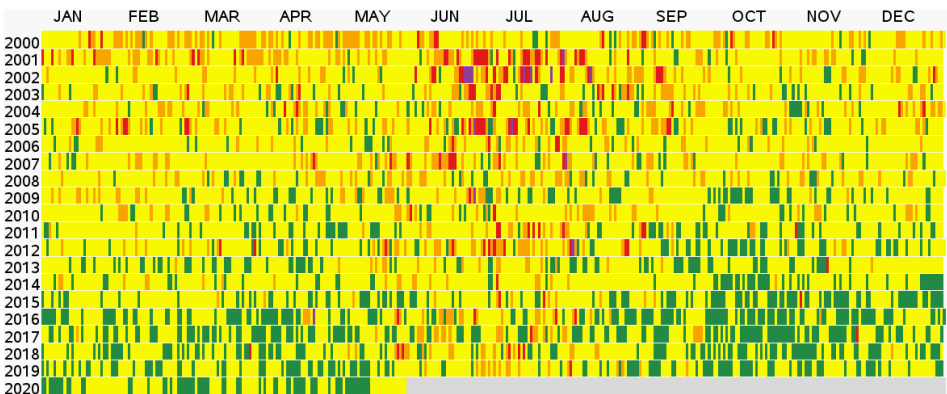

## Denver

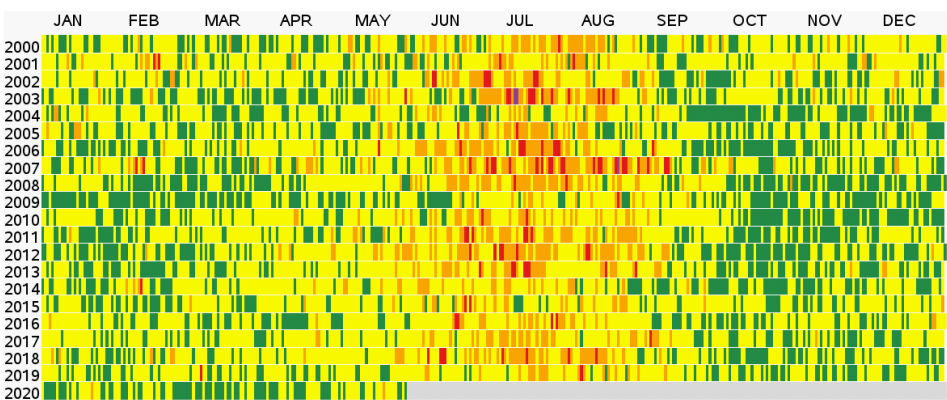

## Detroit

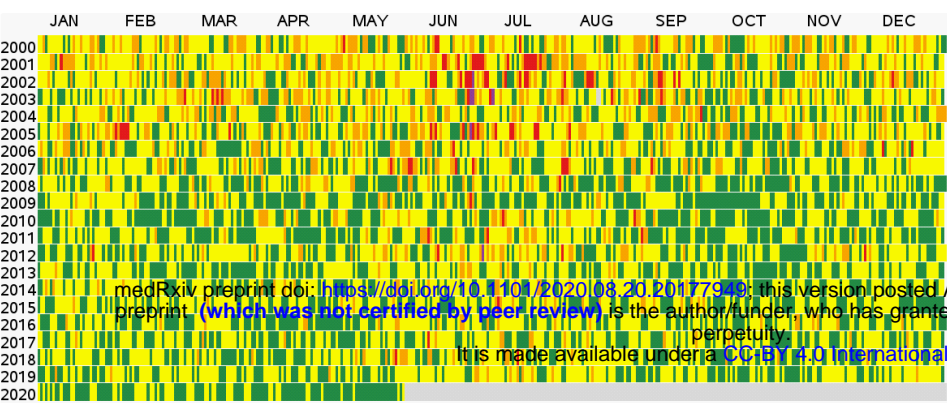

medRxiv preprint doi: <https://doi.org/10.1101/2020.08.20.20177940>; this version posted August 20, 2020. The copyright holder for this preprint (which was not certified by peer review) is the author/funder, who has granted medRxiv a license to display the preprint in perpetuity. It is made available under a [CC-BY 4.0 International license](#).

## Los Angeles

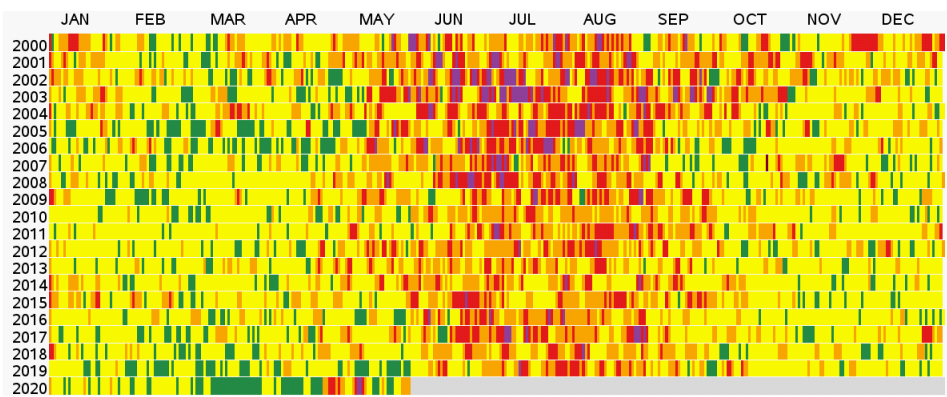

## New York

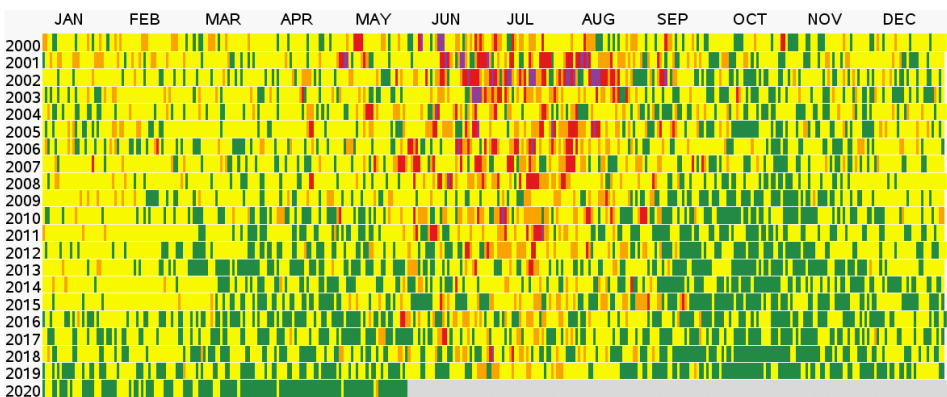

## Philadelphia

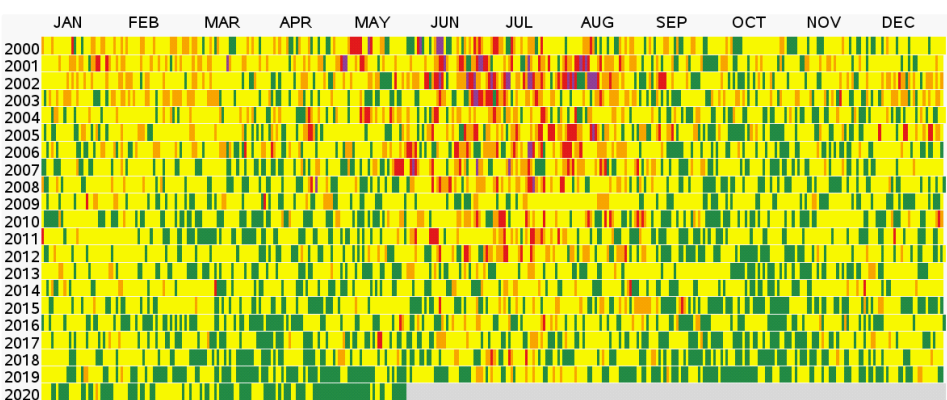

### AQI Category

- Green Good (<= 50 AQI)
- Yellow Moderate (51-100 AQI)
- Orange Unhealthy for Sensitive Groups (101-150 AQI)
- Red Unhealthy (151-200 AQI)
- Purple Very Unhealthy (201-300 AQI)
- Dark Red Hazardous (>=301 AQI)

**Fig. 10** Multi-year daily time series plot shows the variation of air quality status (after considered all pollutants) from 2000 to 2020. Due to lock down and associated reduction of air pollution, air quality status is improved in all the selected cities in USA.

**Antwerp**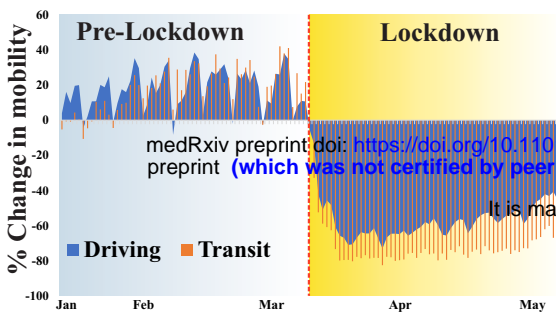**Barcelona**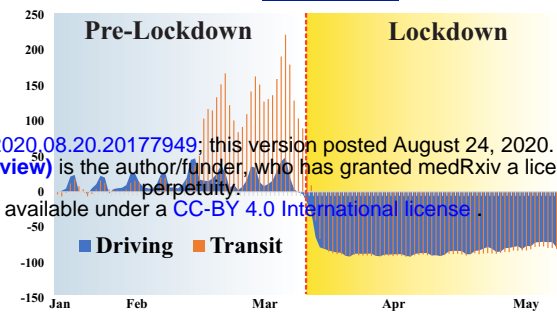**Brussels**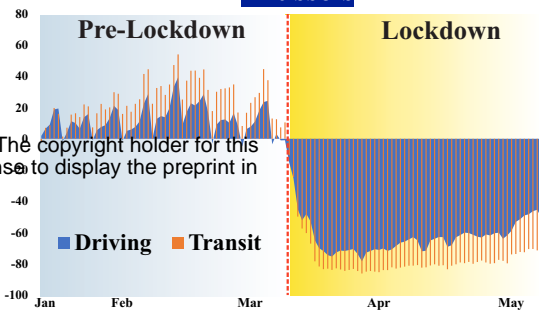**Chicago**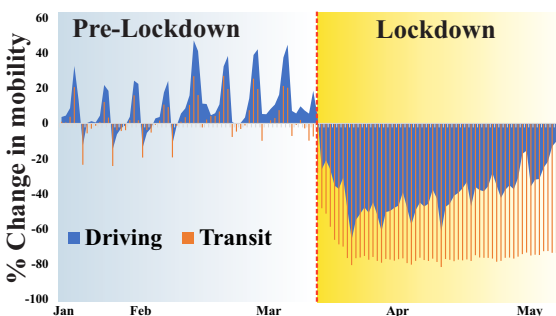**Cologne**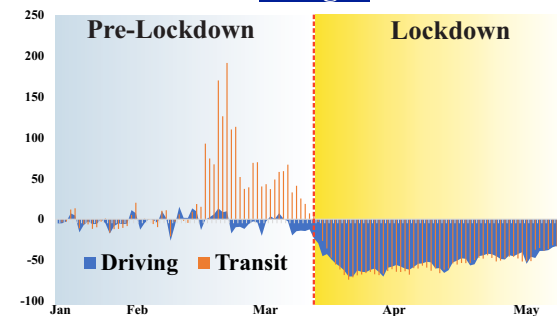**Denver**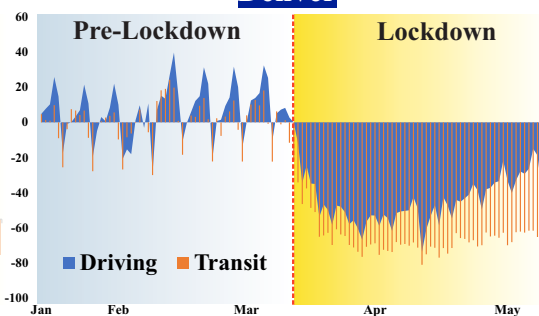**Frankfurt**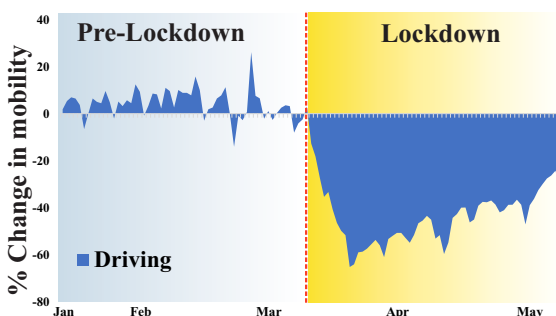**London**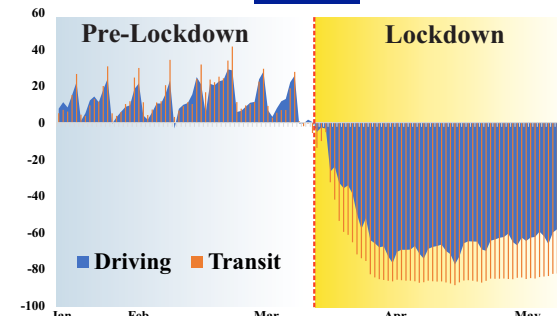**Los Angeles**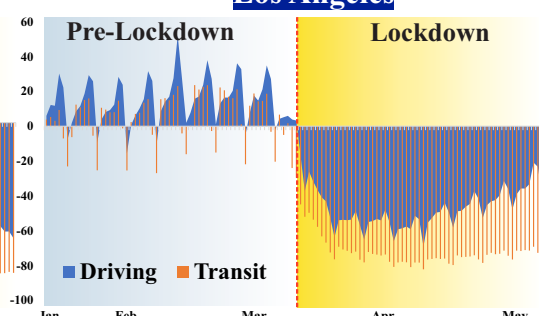**Madrid**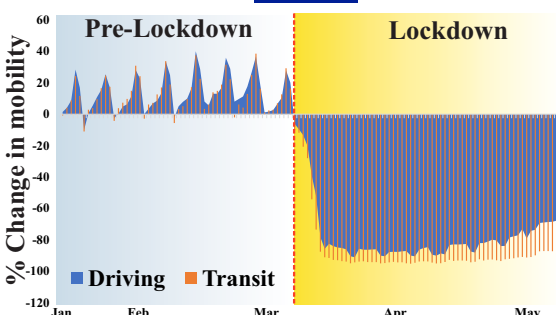**Milan**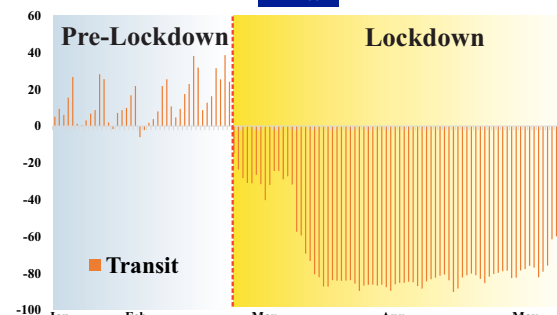**New York**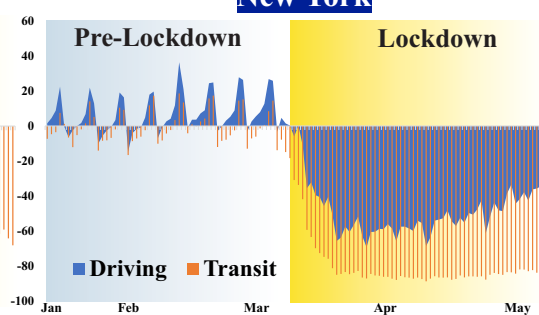**Paris**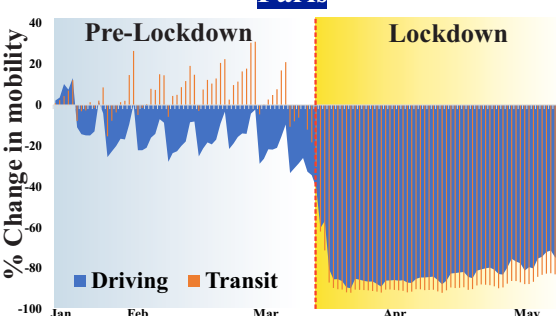**Philadelphia**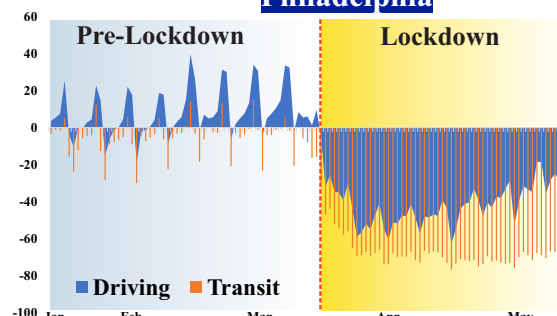**Rotterdam**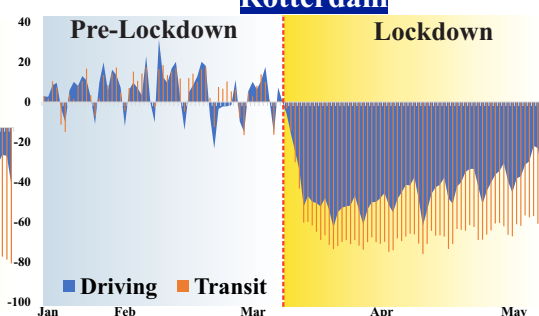**Sao Paulo**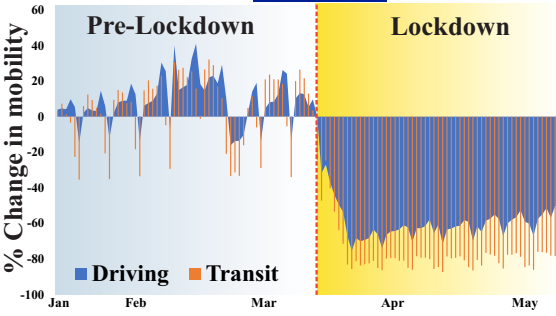**Utrecht**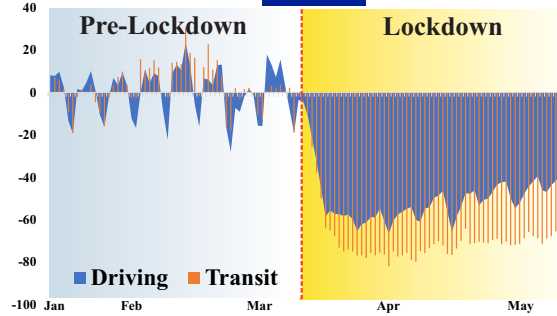**Fig. 11** Changes in mobility due to lock down led restriction in the selected cities.

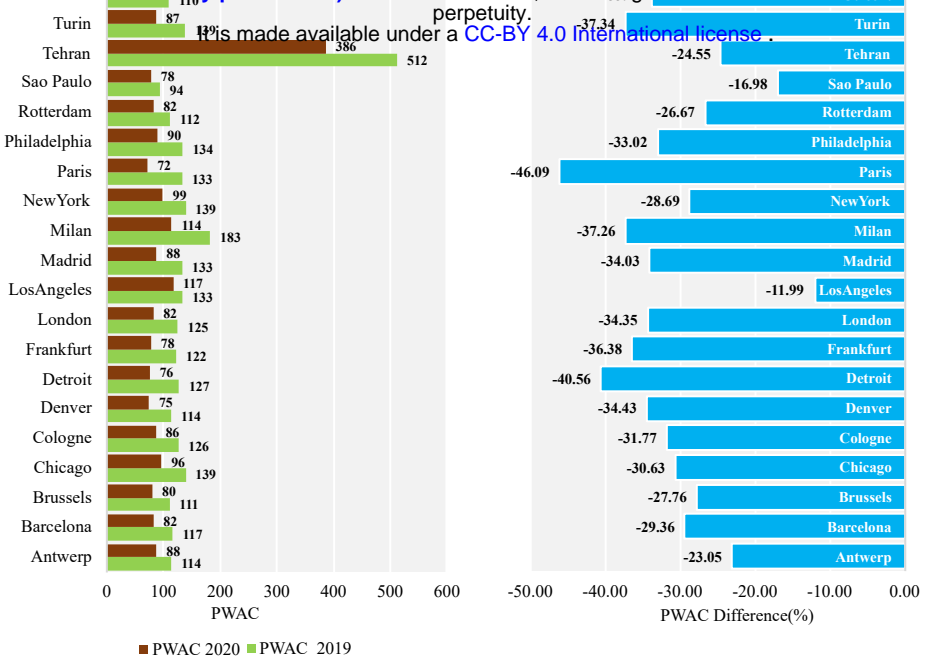

**Fig. 12** Pollution weighted average concentration of the major cities in 2019 and 2020 (during Feb 1 to May 11).



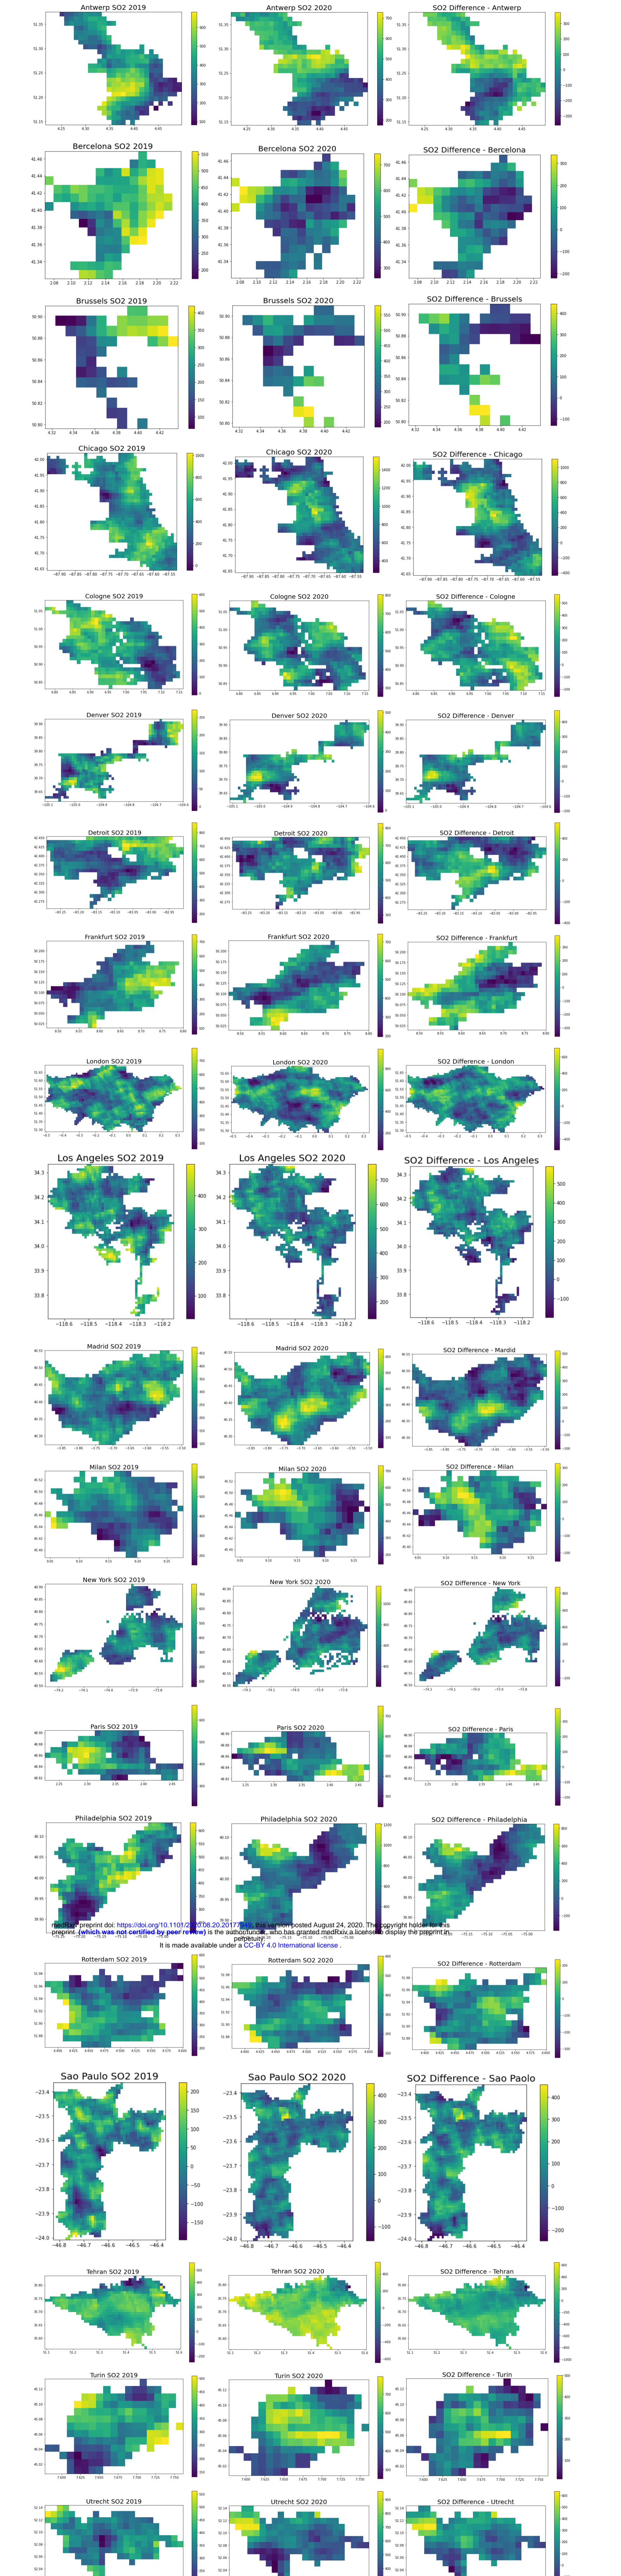

**Fig. S1** Spatial distribution of SO<sub>2</sub> (μmol m<sup>-2</sup>) in the selected cities in 2019 and 2020 (from Feb to May). Spatial maps in third panel shows the spatial difference in SO<sub>2</sub> concentration between 2019 and 2020.

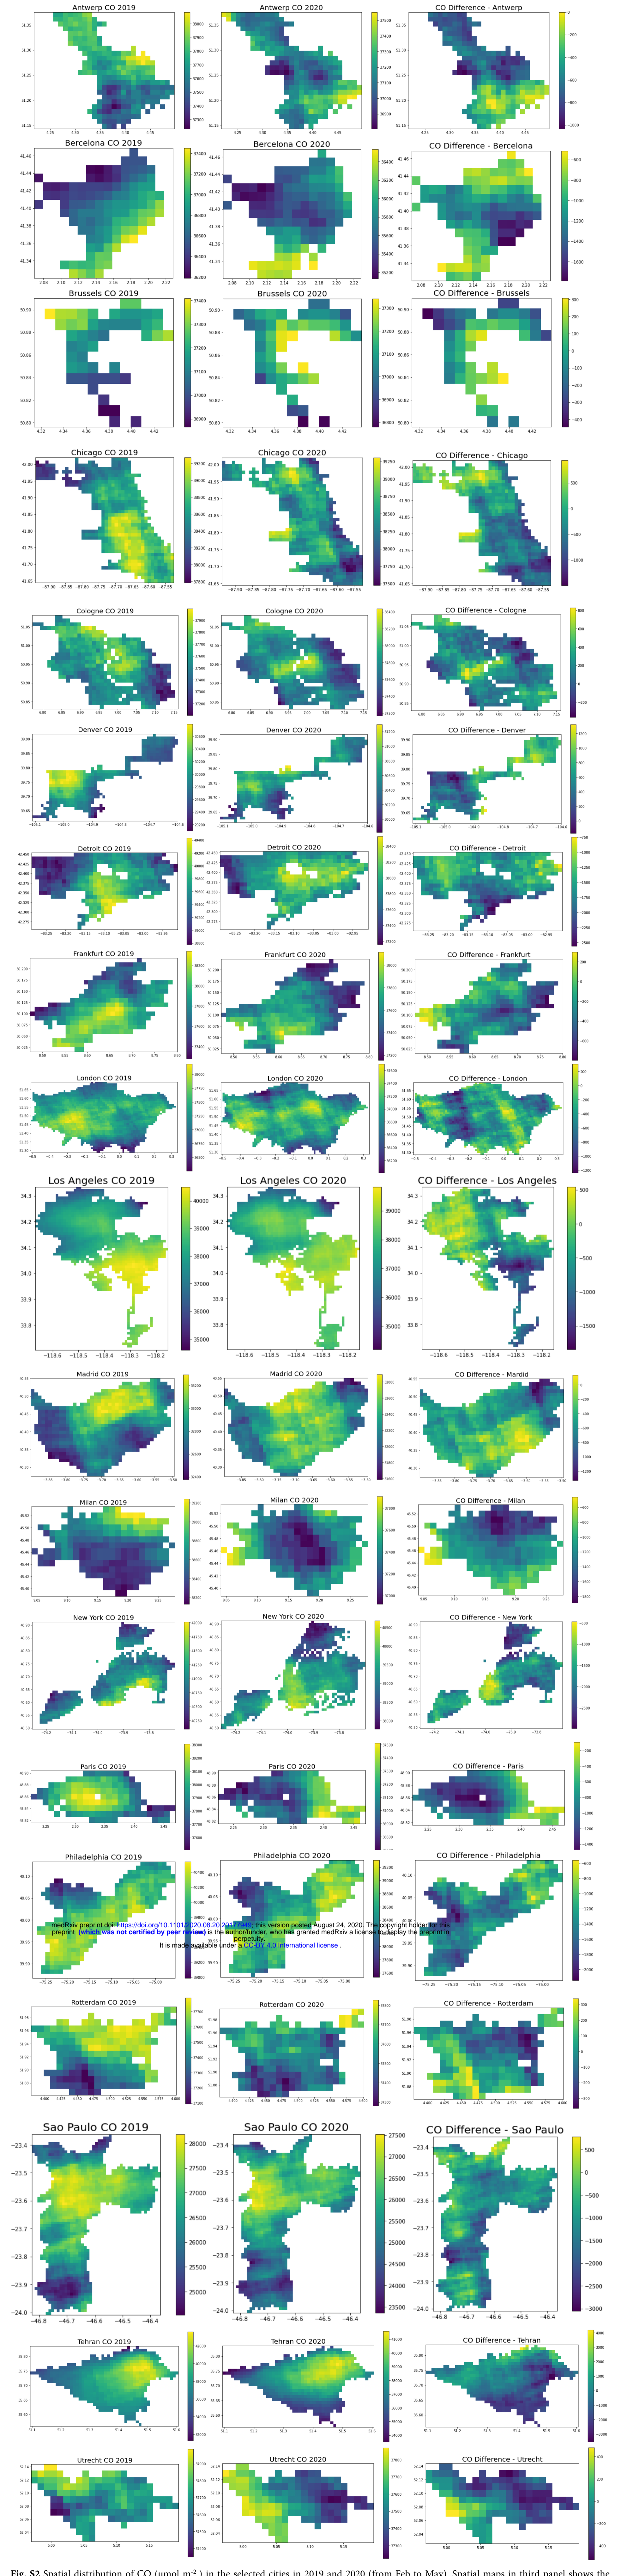

**Fig. S2** Spatial distribution of CO ( $\mu\text{mol m}^{-2}$ ) in the selected cities in 2019 and 2020 (from Feb to May). Spatial maps in third panel shows the spatial difference in CO concentration between 2019 and 2020.

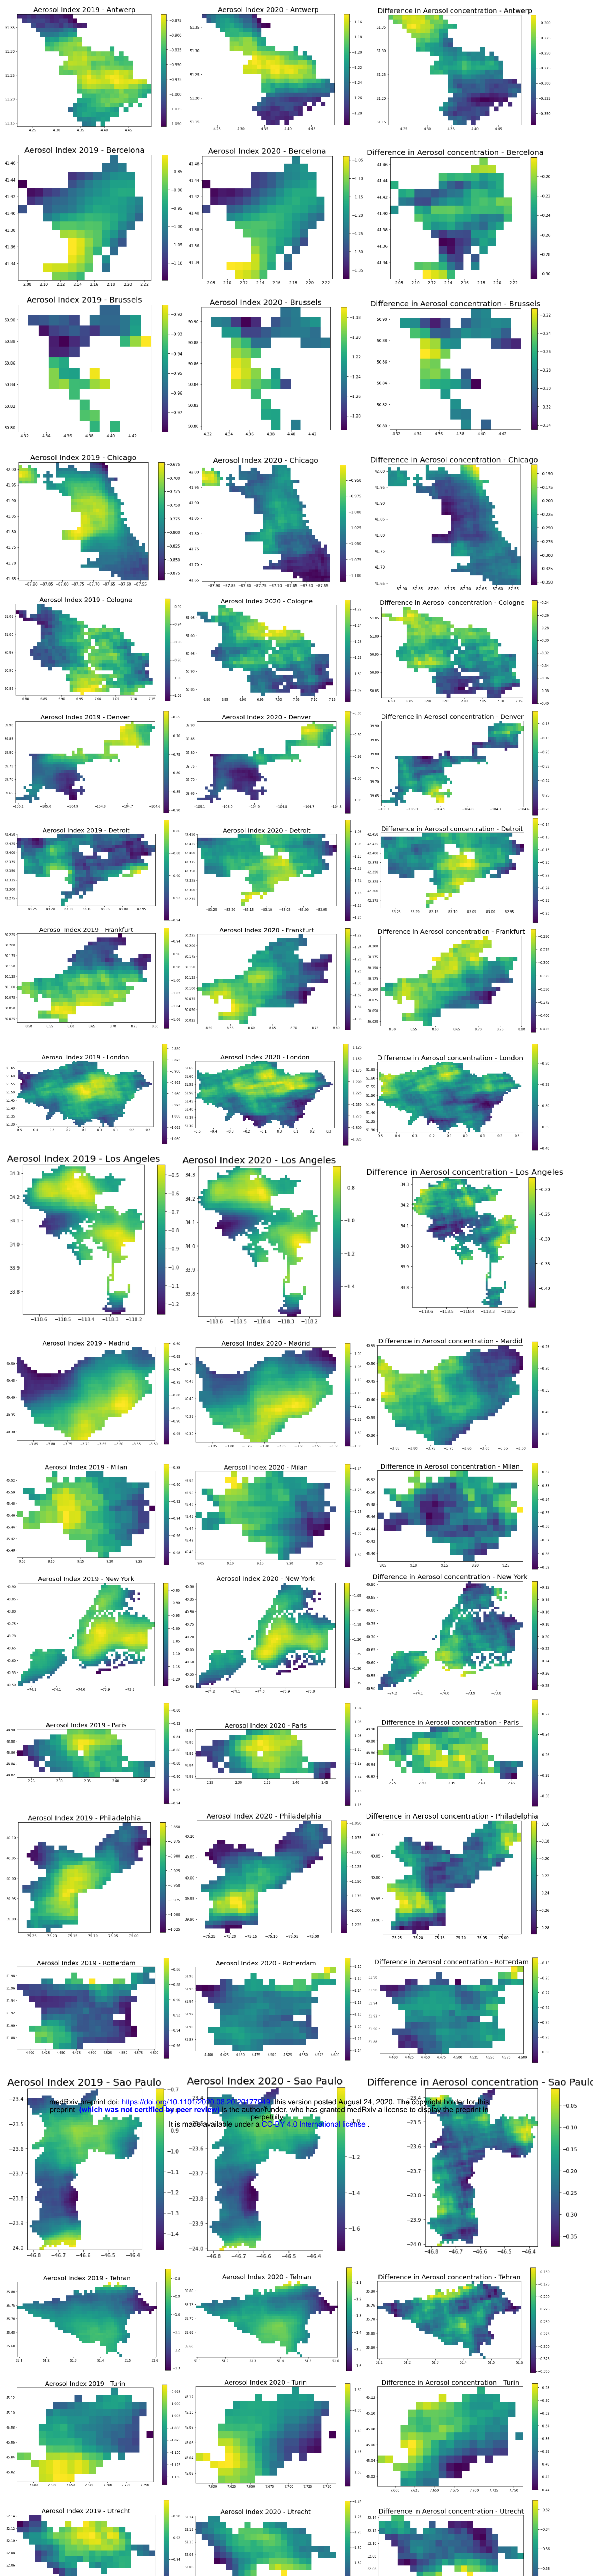

**Fig. S3** Spatial distribution of Aerosol index in the selected cities in 2019 and 2020 (from Feb to May). Spatial maps in third panel shows the spatial difference in aerosol concentration between 2019 and 2020.

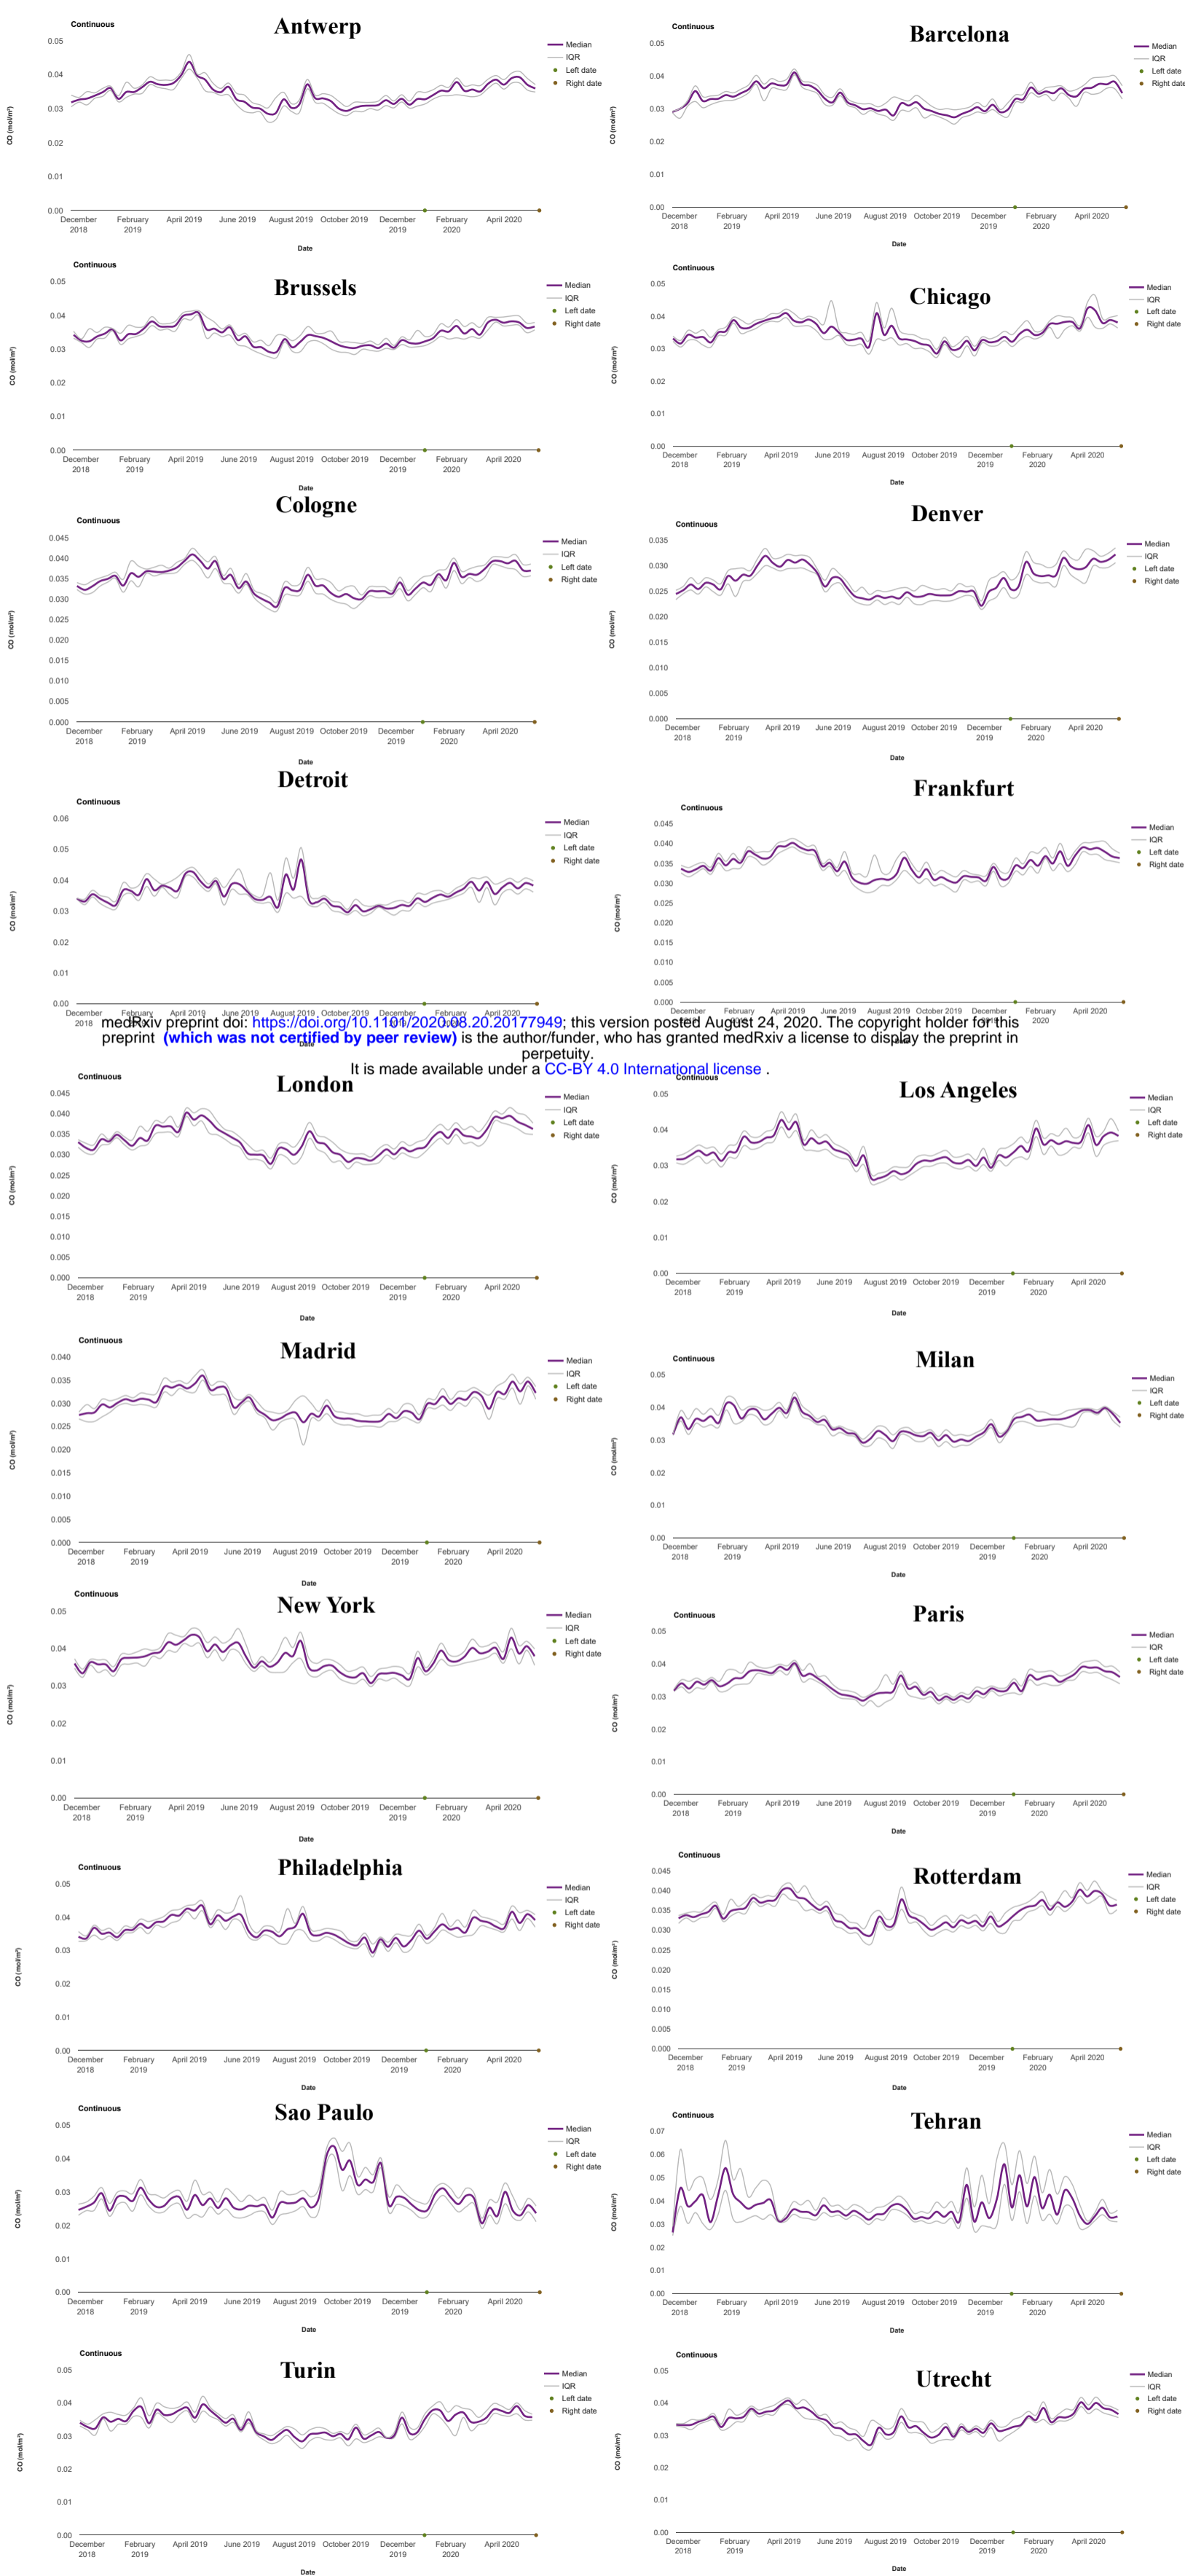

**Fig. S4** Temporal variation of CO ( $\mu\text{mol m}^{-2}$ ) concentration in the selected cities from August 2018 to May 2020 derived from Sentinel 5P TROPOMI data.

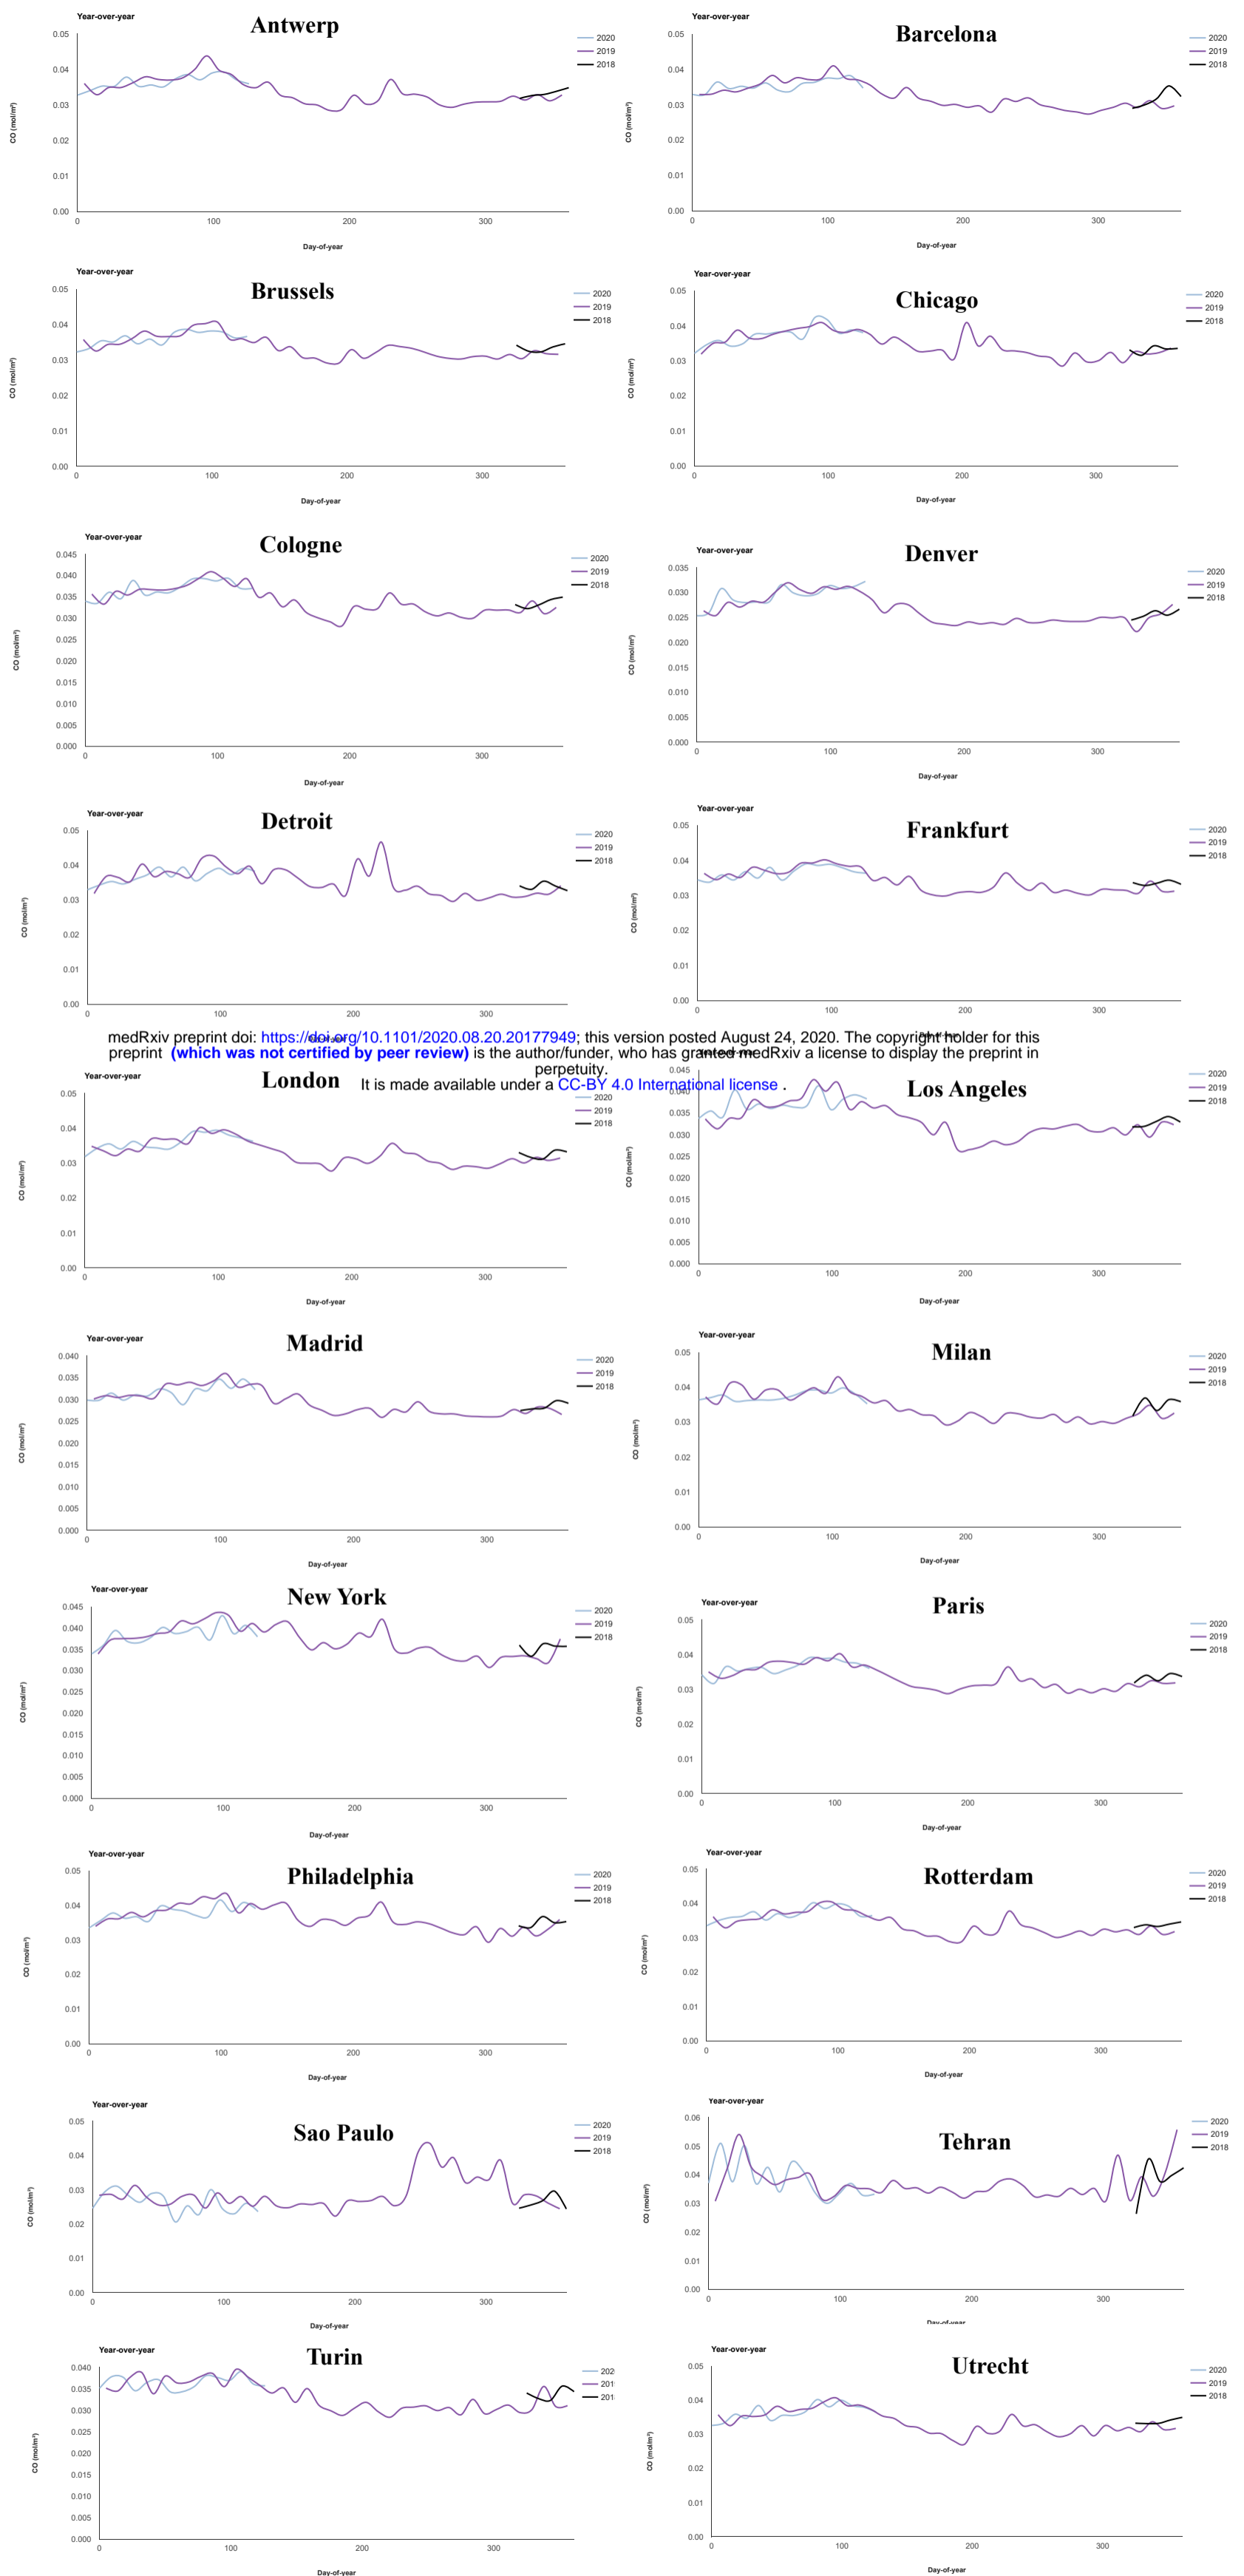

**Fig. S5** Temporal variation of CO ( $\mu\text{mol m}^{-2}$ ) concentration in the selected cities in 2018, 2019, and 2020 derived from Sentinel 5P TROPOMI data.

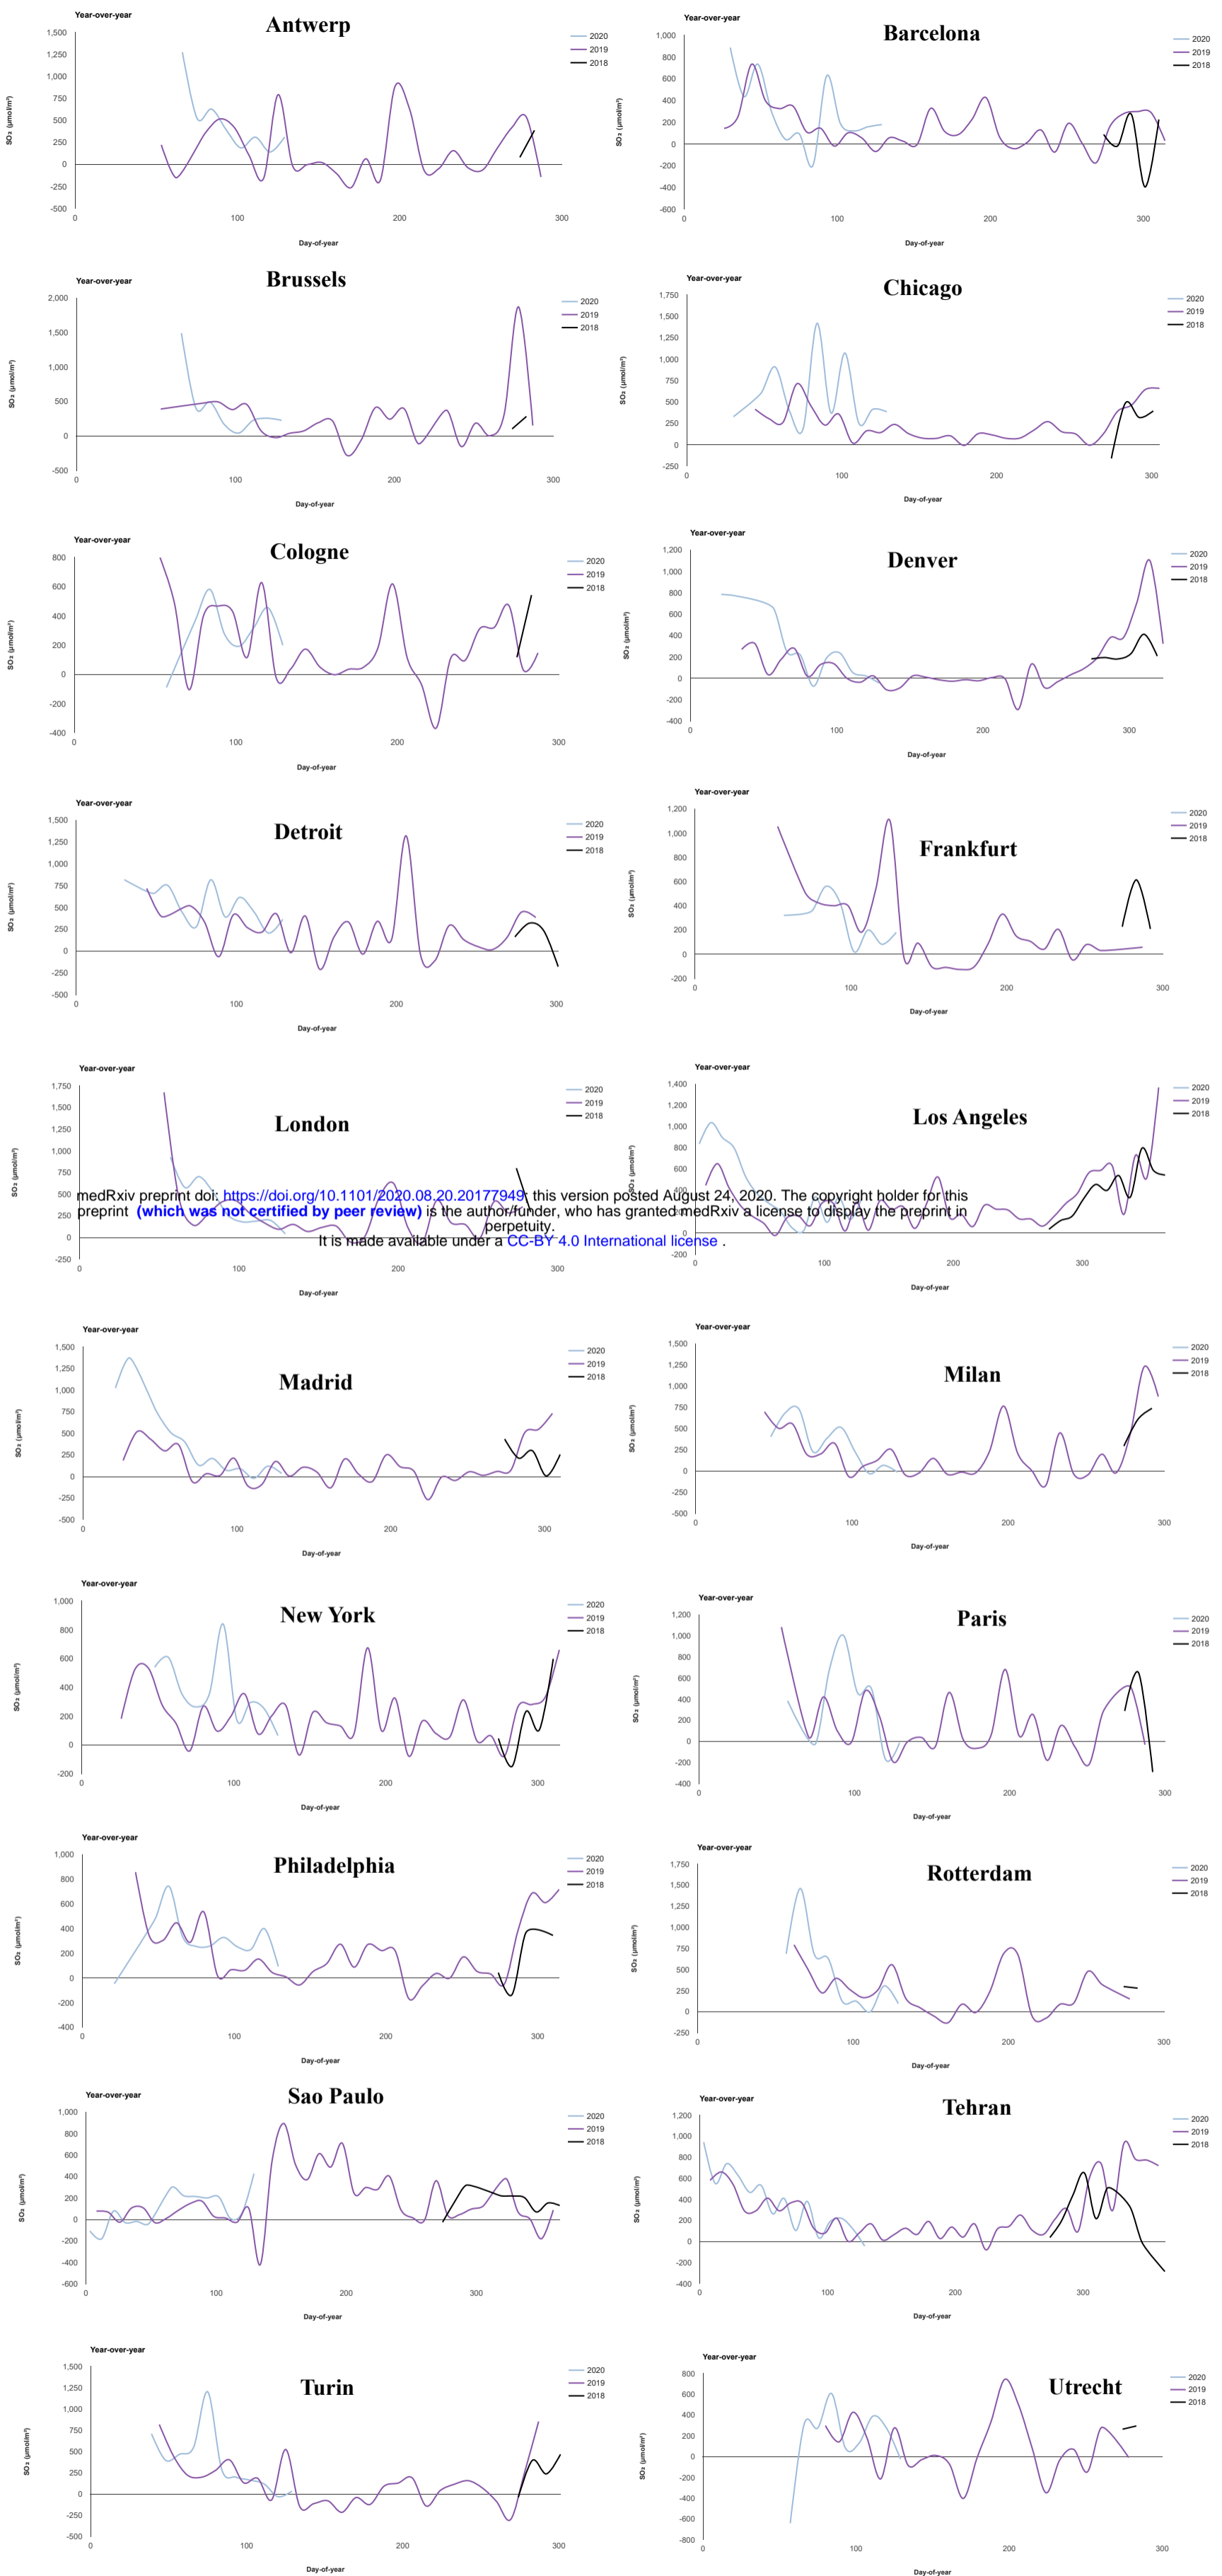

**Fig. S6** Temporal variation of  $\text{SO}_2$  ( $\mu\text{mol m}^{-2}$ ) concentration in the selected cities from August 2018 to May 2020 derived from Sentinel 5P TROPOMI data.

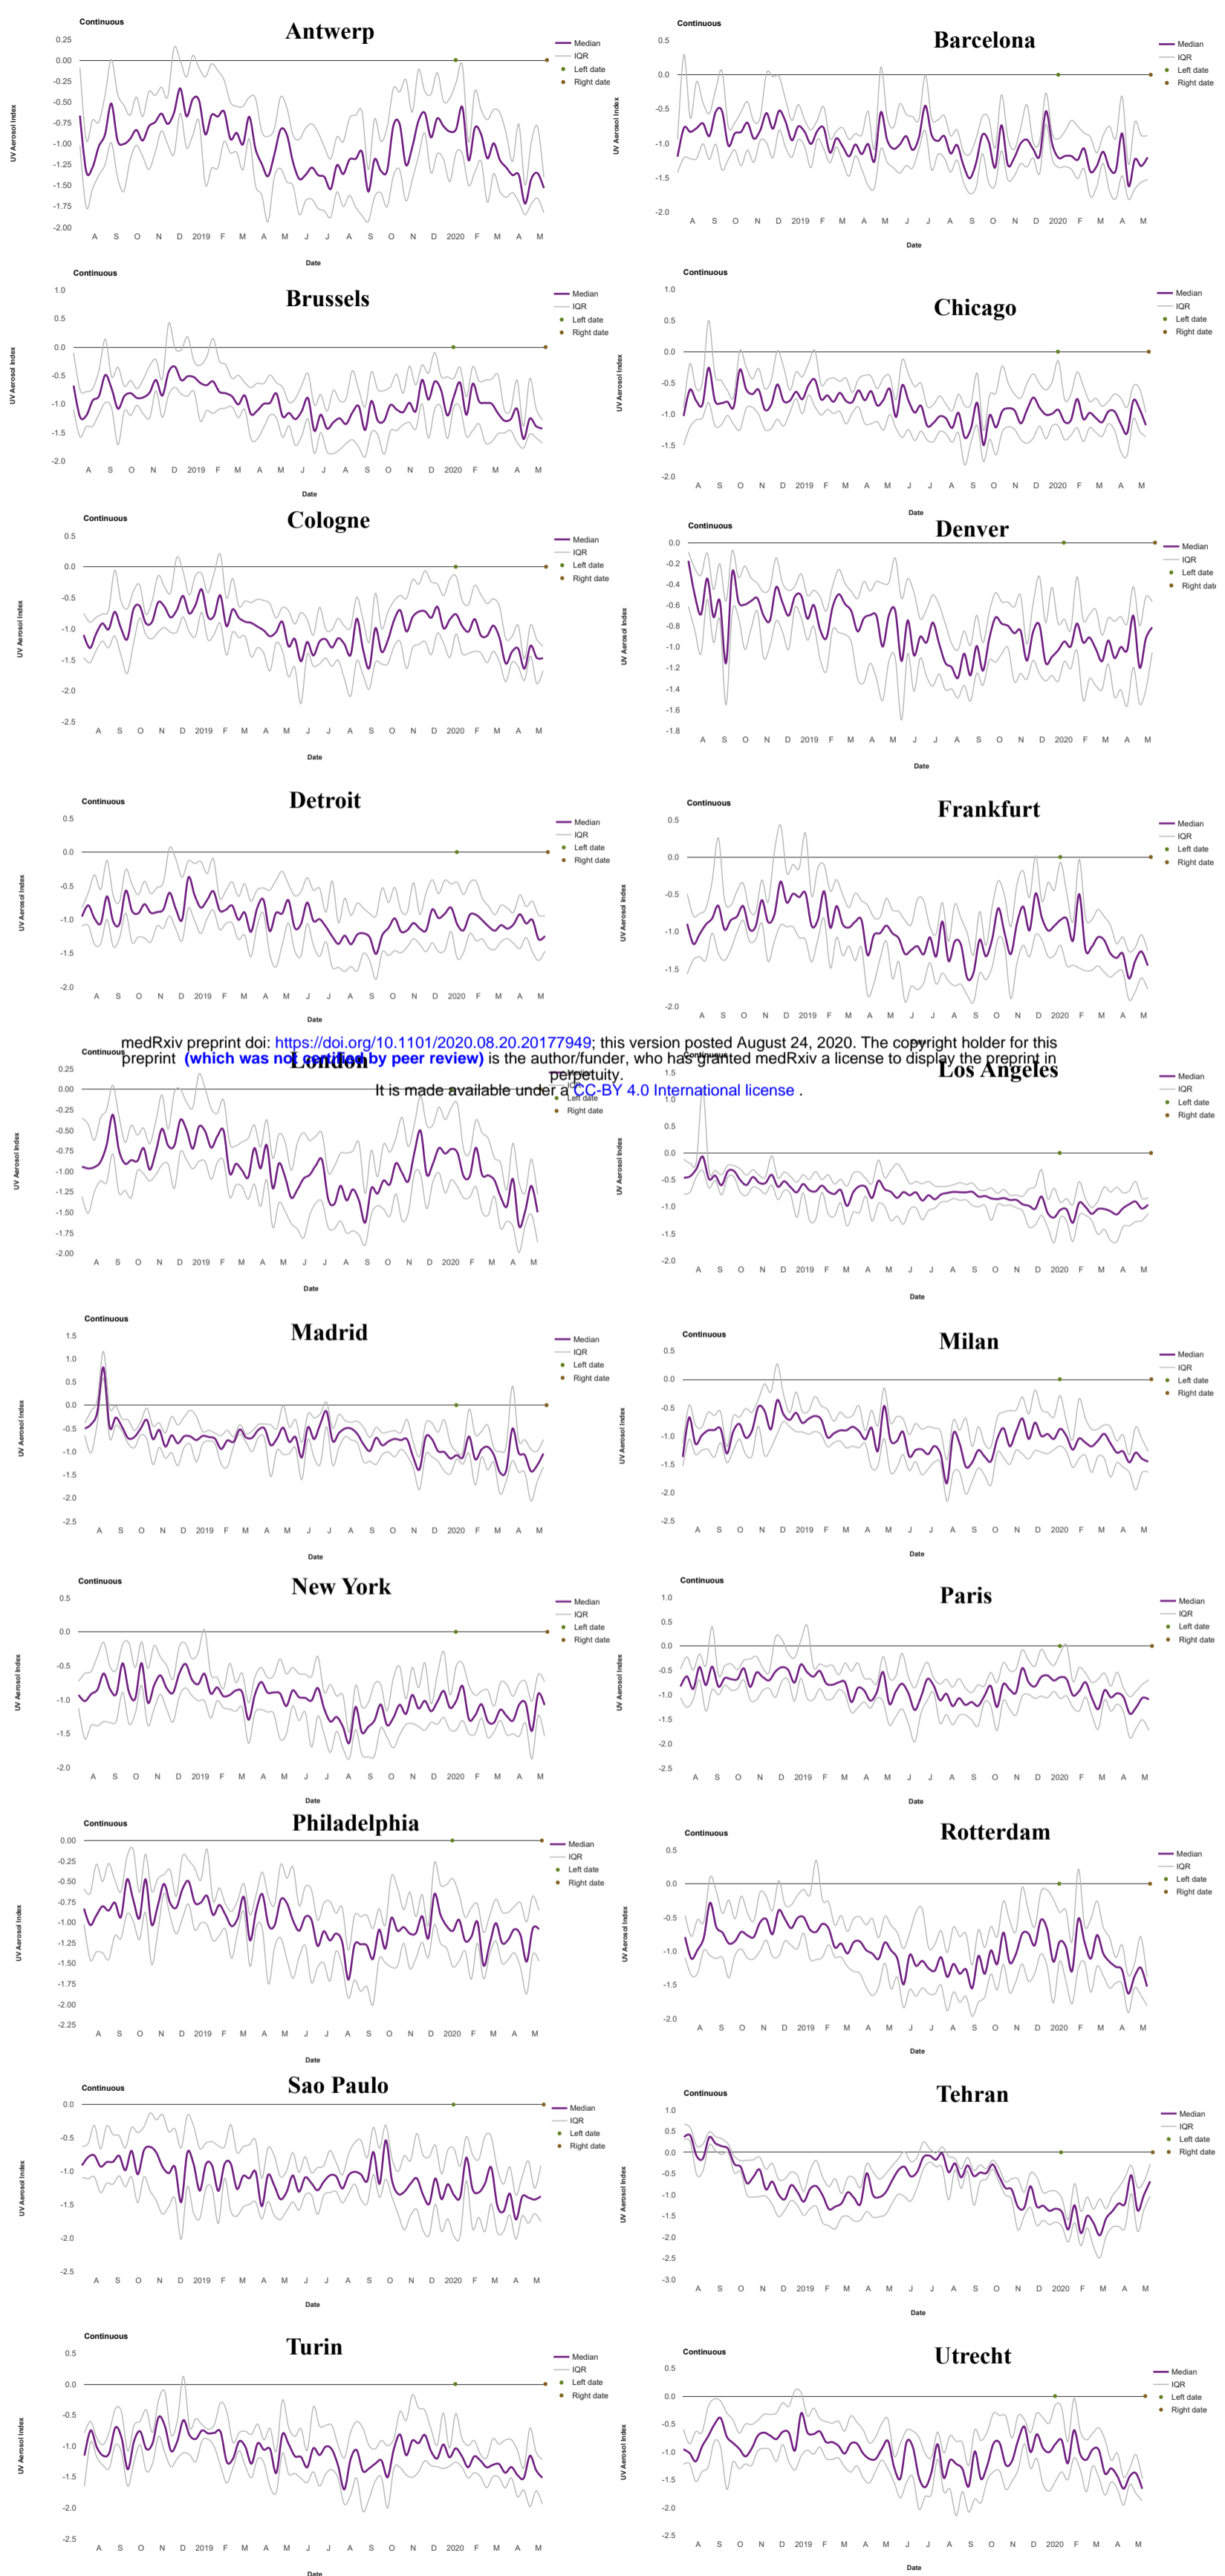

**Fig. S7** Temporal variation of aerosol concentration in the selected cities from August 2018 to May 2020 derived from Sentinel 5P TROPOMI observation.

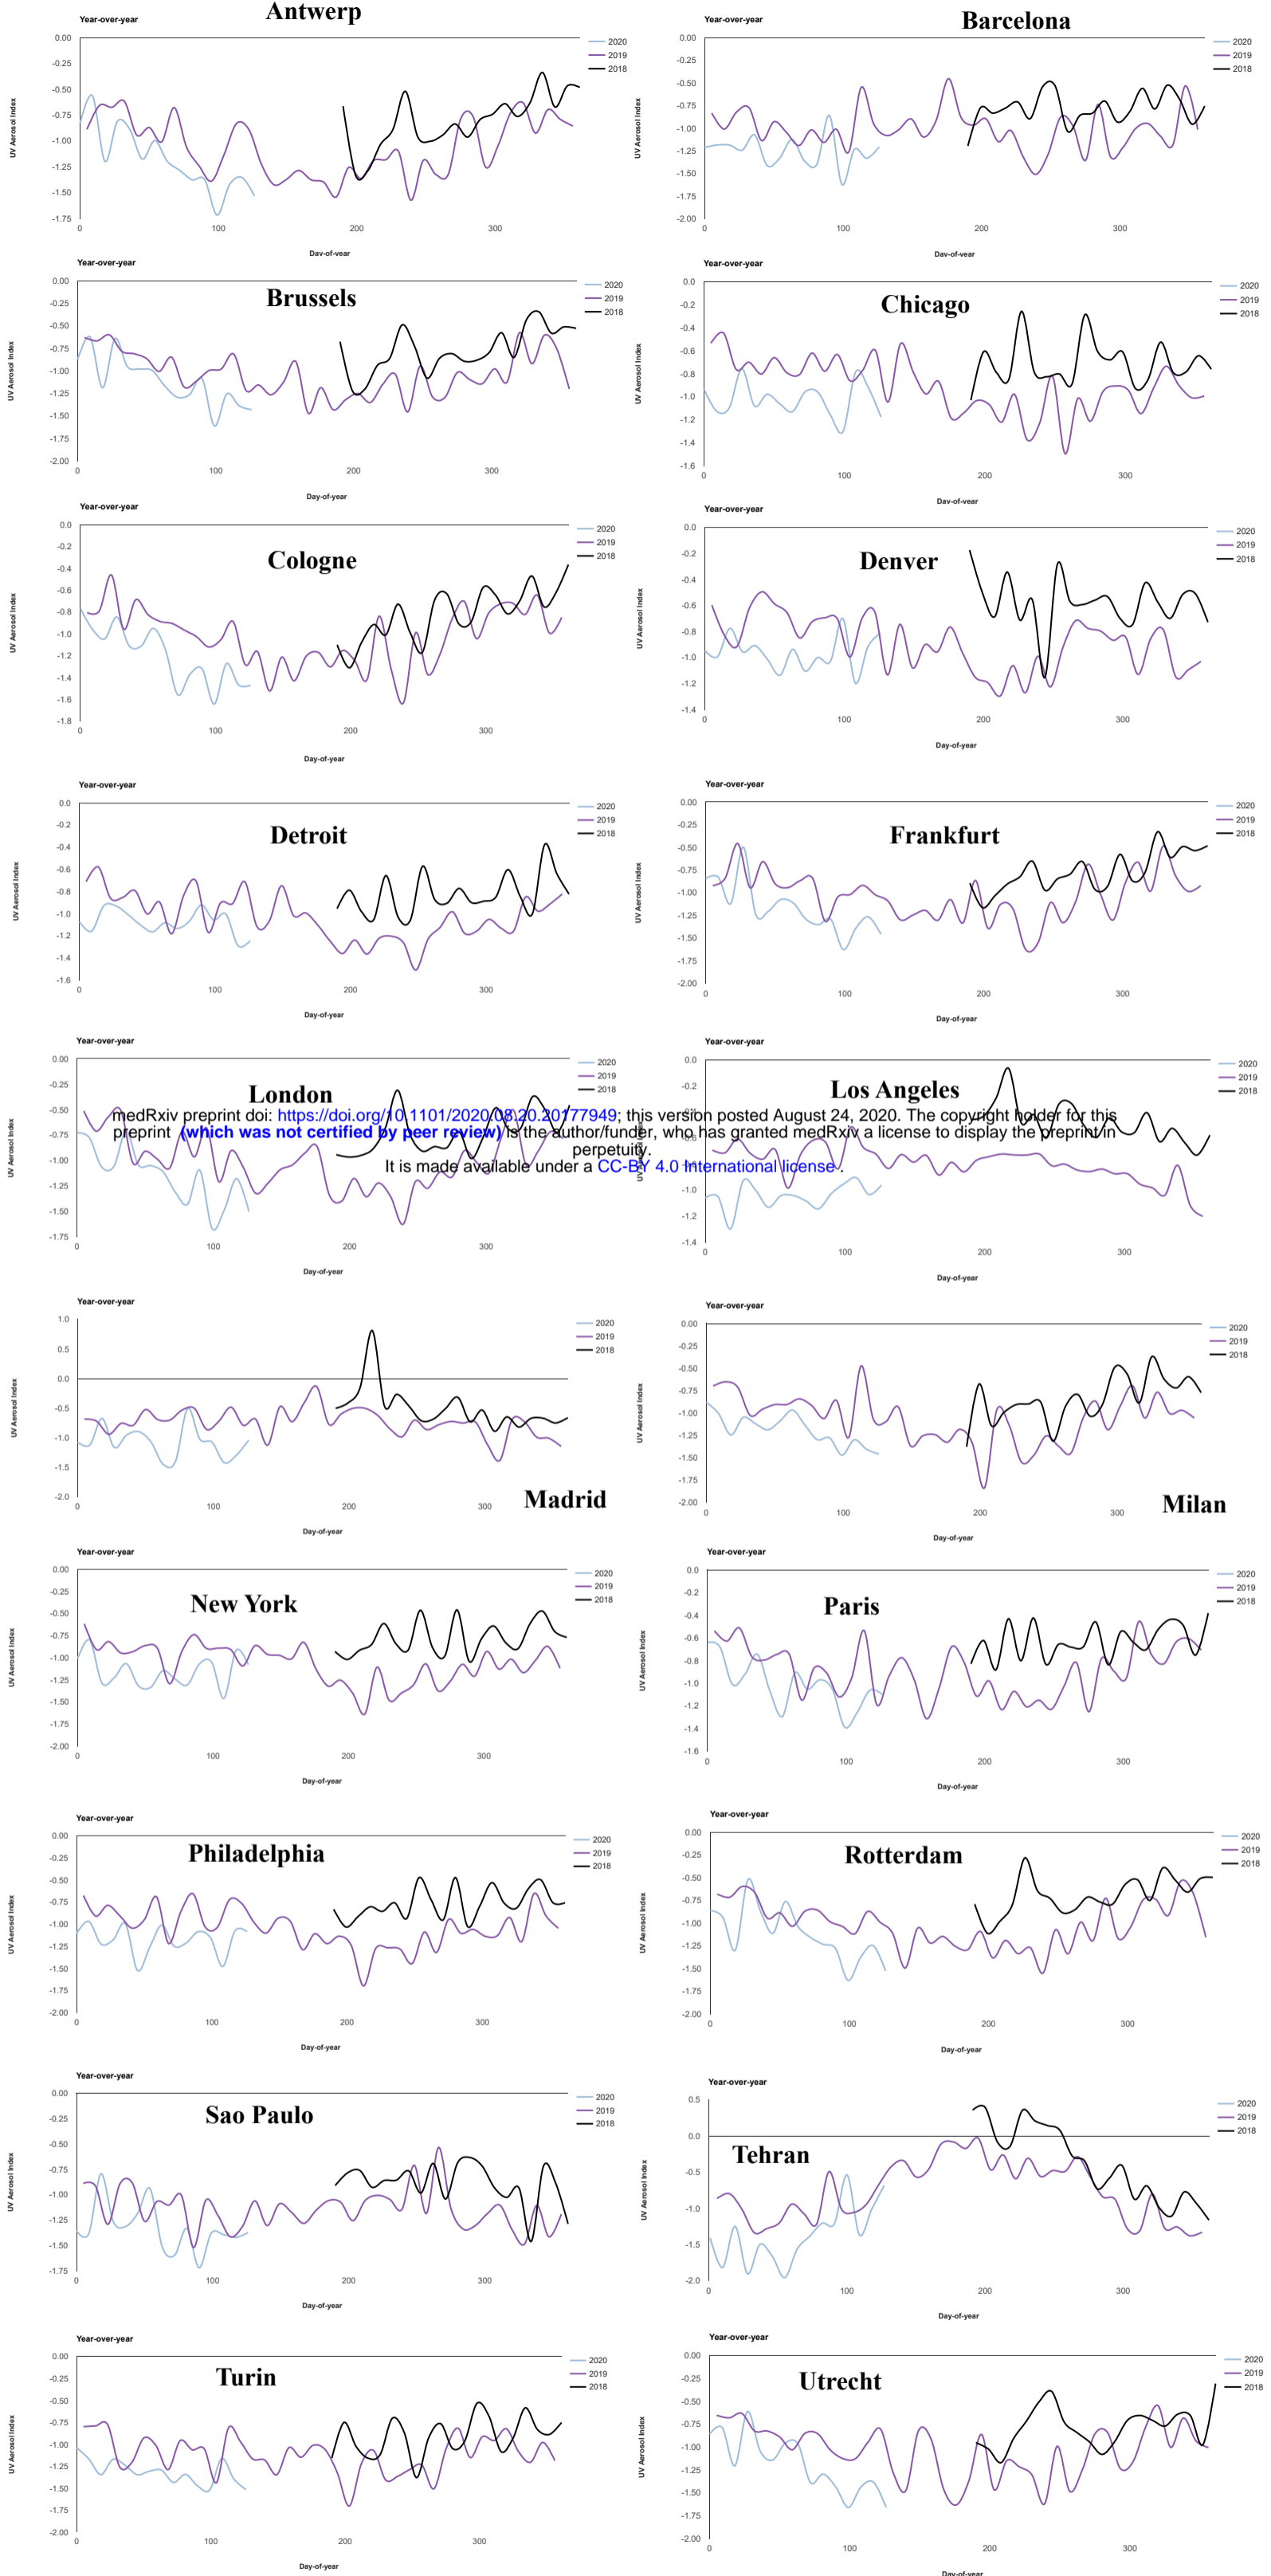

**Fig. S8** Temporal variation of aerosol concentration in the selected cities in 2018, 2019, and 2020 derived from Sentinel 5P TROPOMI observation.



## Daily PM<sub>2.5</sub> and PM<sub>10</sub> values in 2019

## Daily PM<sub>2.5</sub> and PM<sub>10</sub> values in 2020

### Chicago

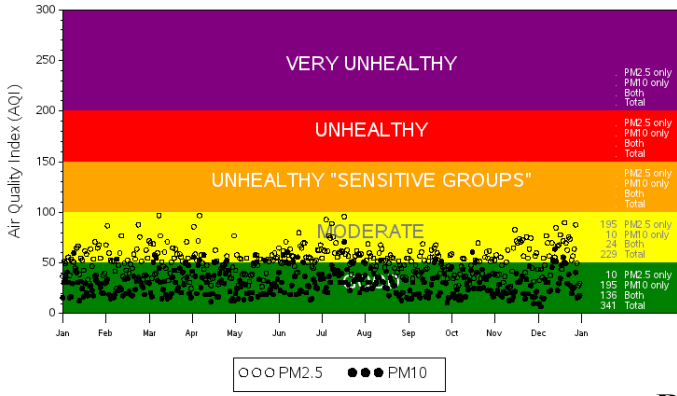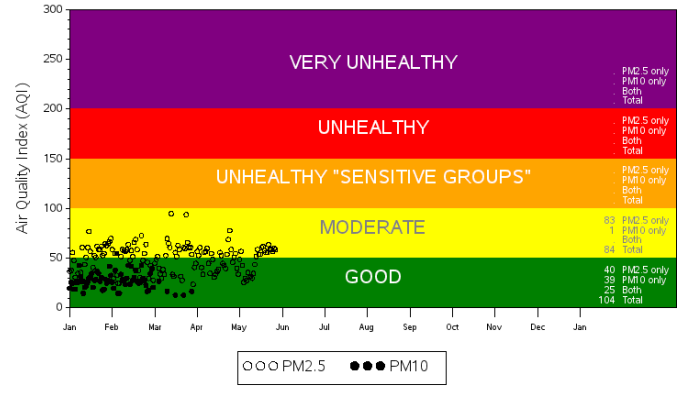

### Denver

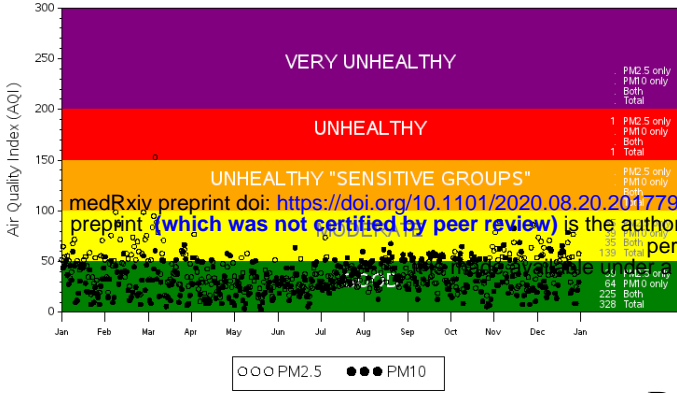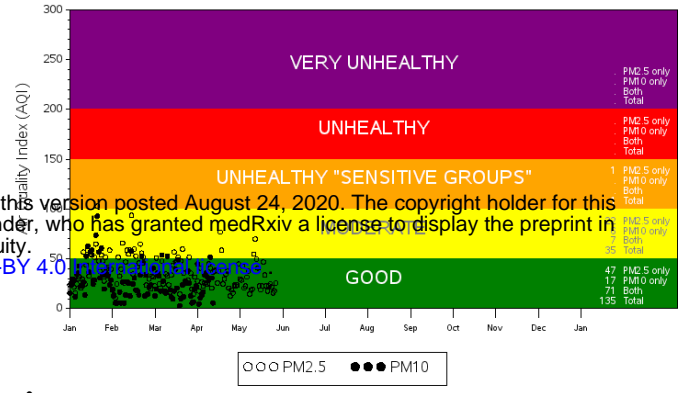

### Detroit

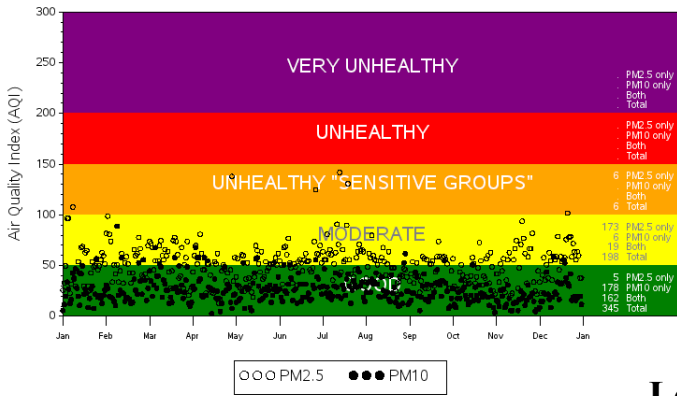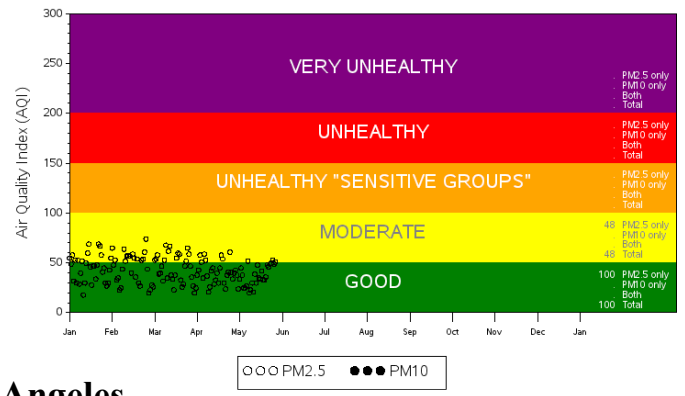

### Los Angeles

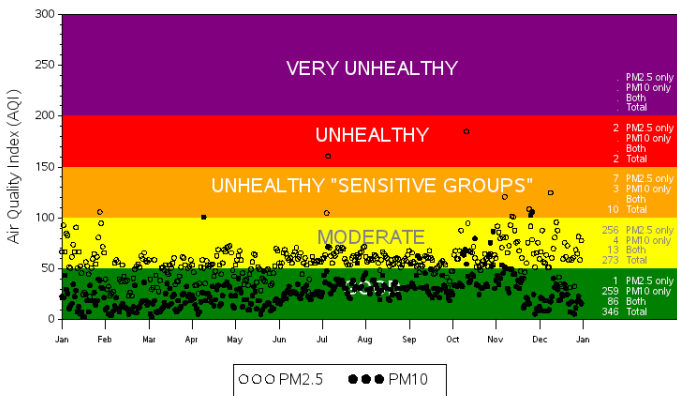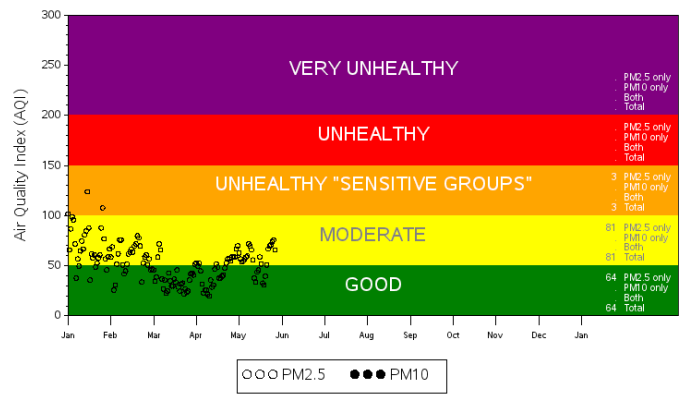

### New York

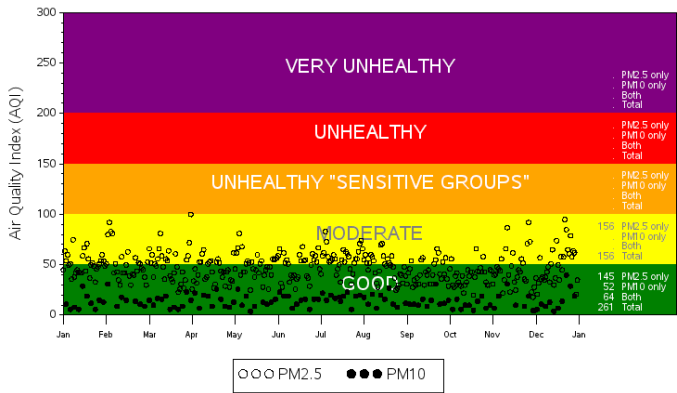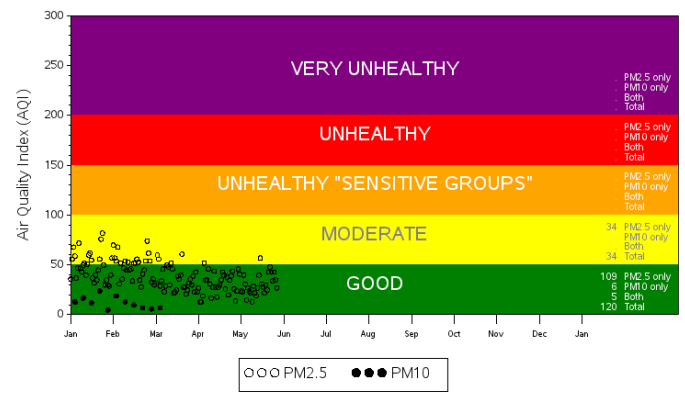

### Philadelphia

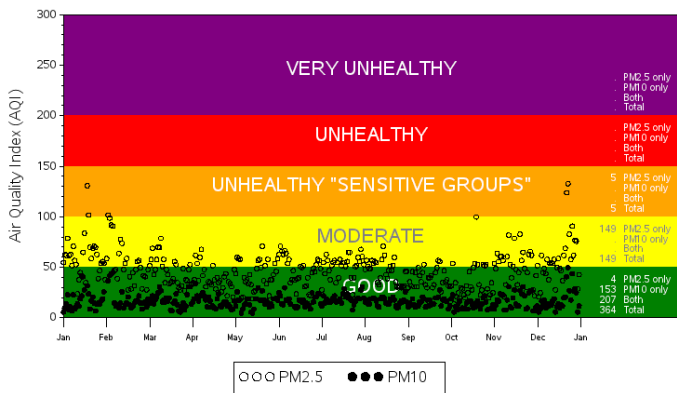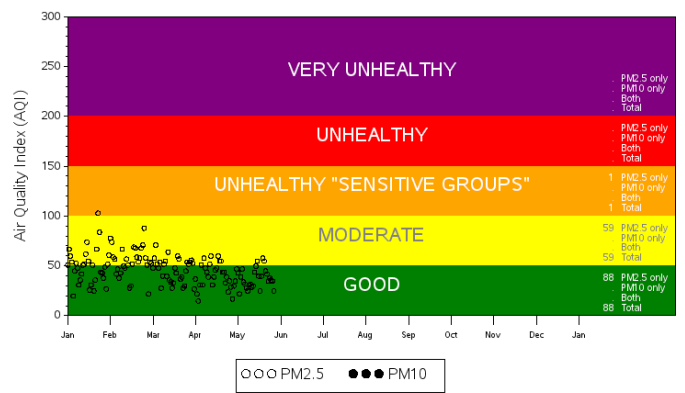

**Fig. S9** Shows the ground monitored air quality index (based on PM<sub>2.5</sub> and PM<sub>10</sub>) in 2019 and 2020 in the selected cities.

## Daily CO and O<sub>3</sub> values in 2019

## Daily CO and O<sub>3</sub> values in 2020

### Chicago

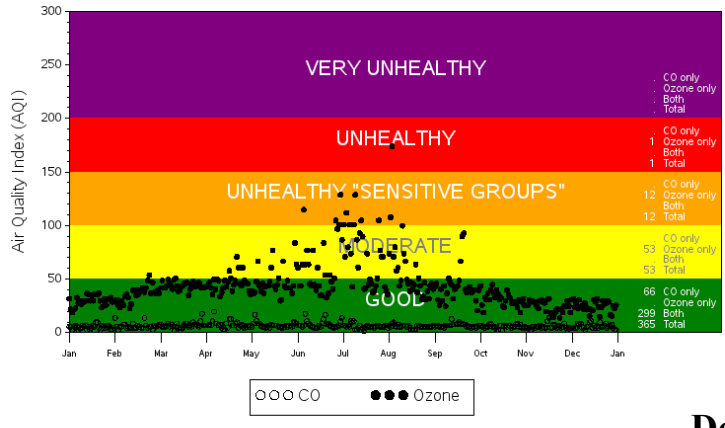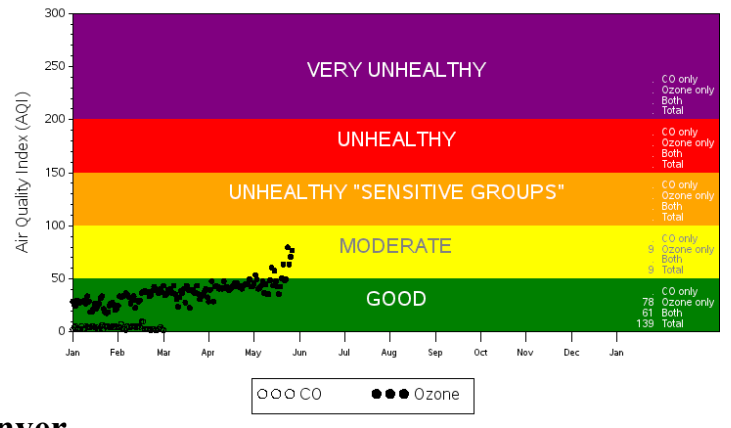

### Denver

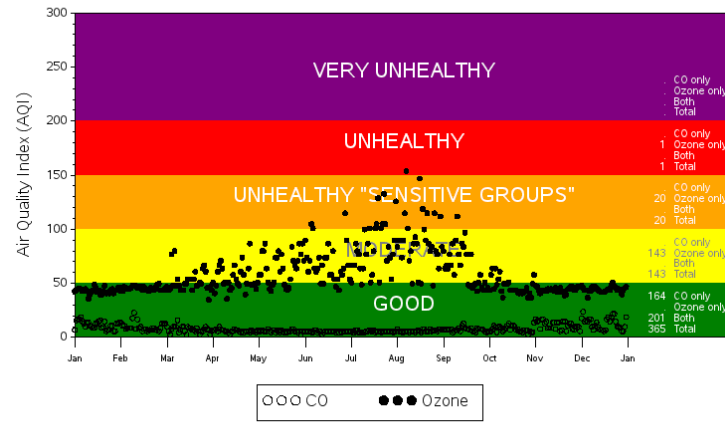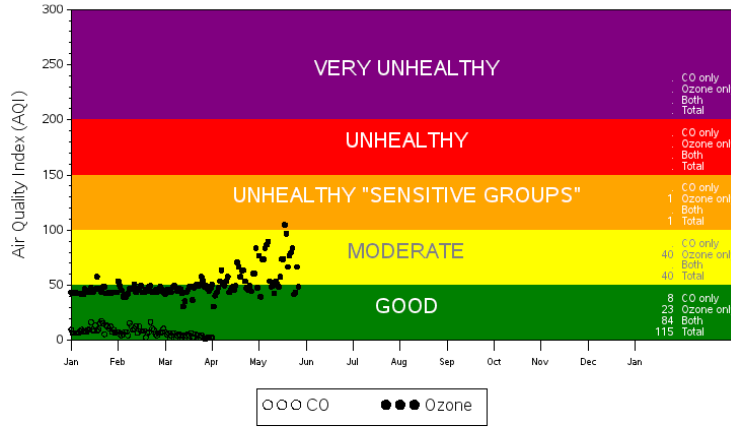

### New York

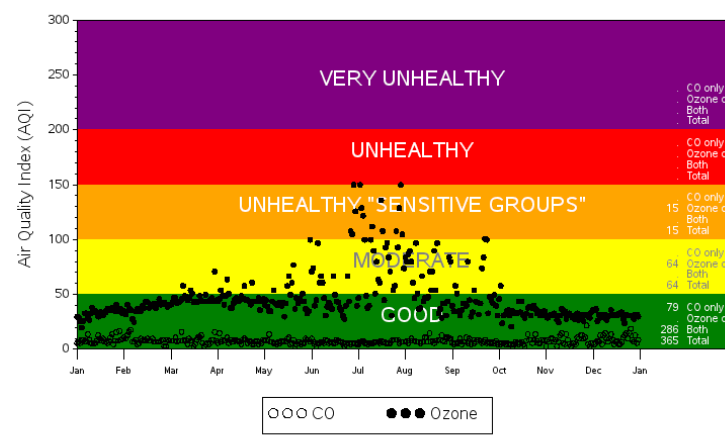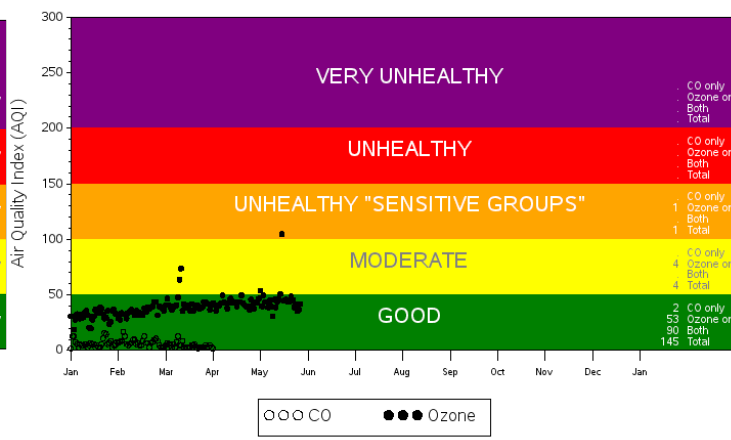

### Philadelphia

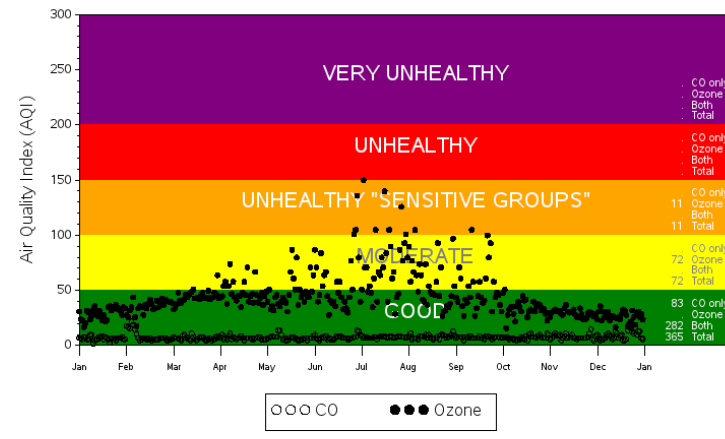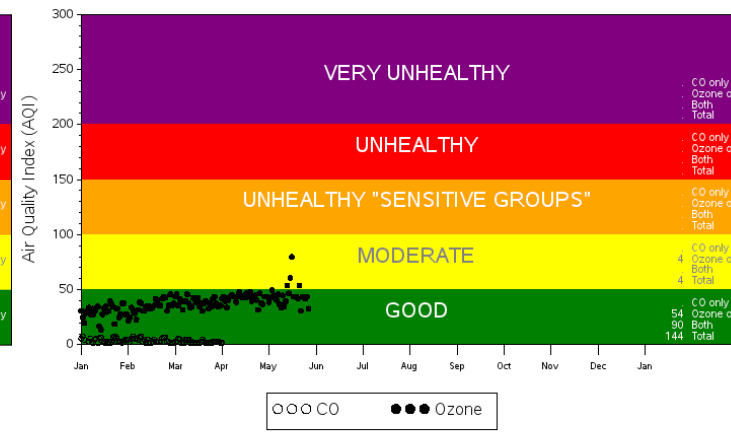

**Fig. S10** Shows the ground monitored air quality index (based on CO and O<sub>3</sub>) in 2019 and 2020 in the selected cities.

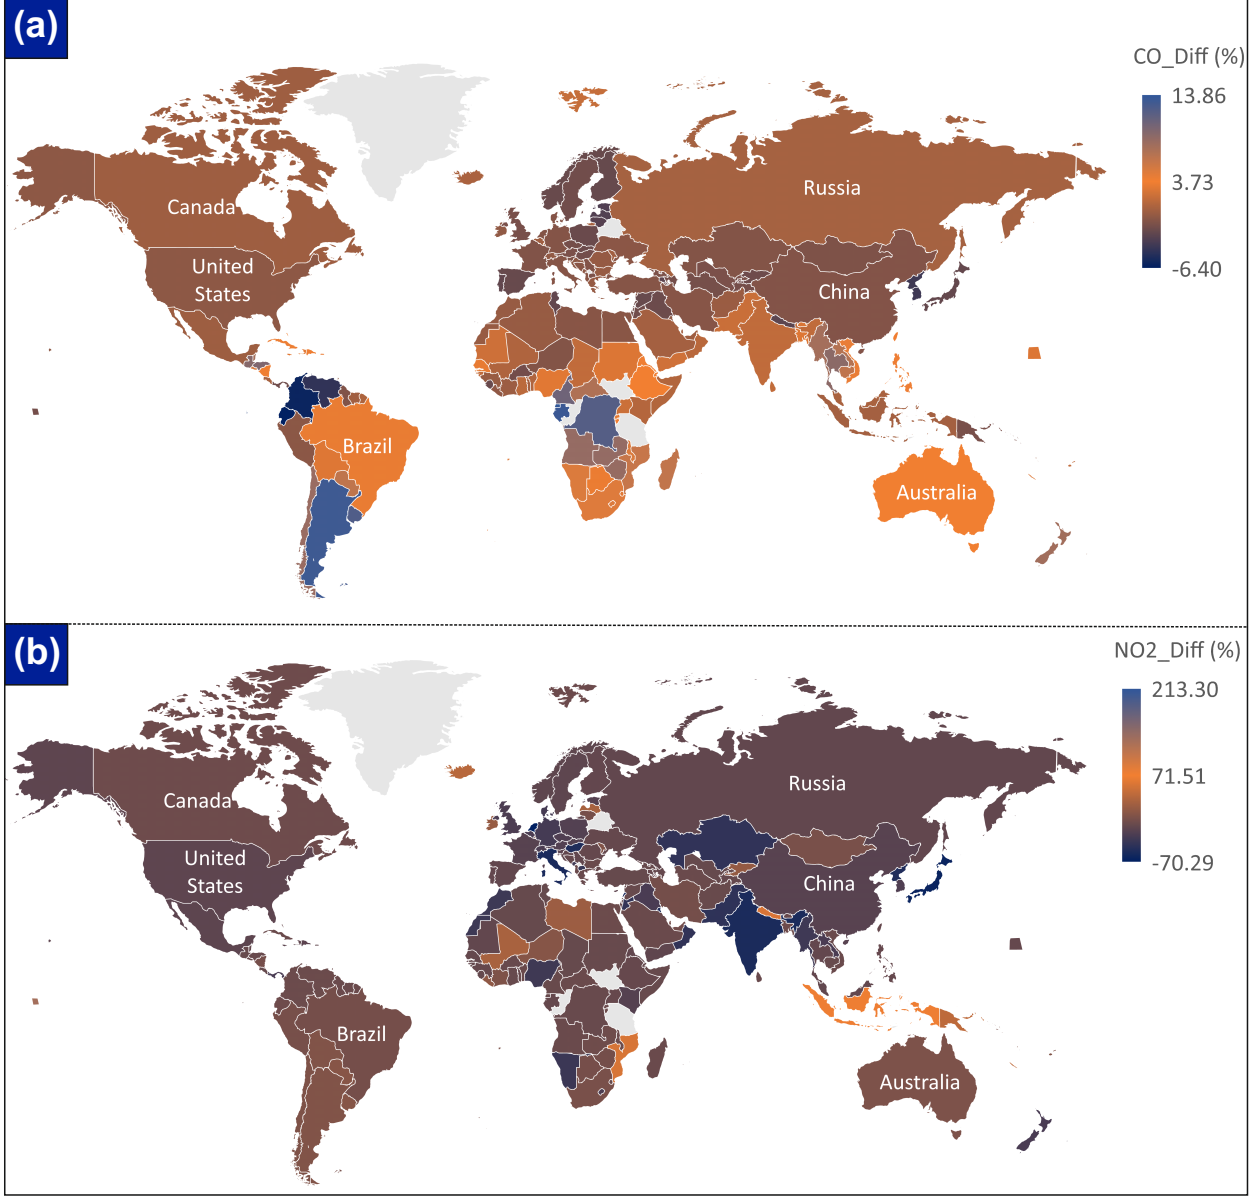

**Fig. S11** Changes in NO<sub>2</sub> and CO concentration during the study period (1st Feb to 11th May in 2019 and 2020). NO<sub>2</sub> changes are maximum in few Asian countries and European countries. Whereas, CO changes are prominent in China, USA, and few European countries.

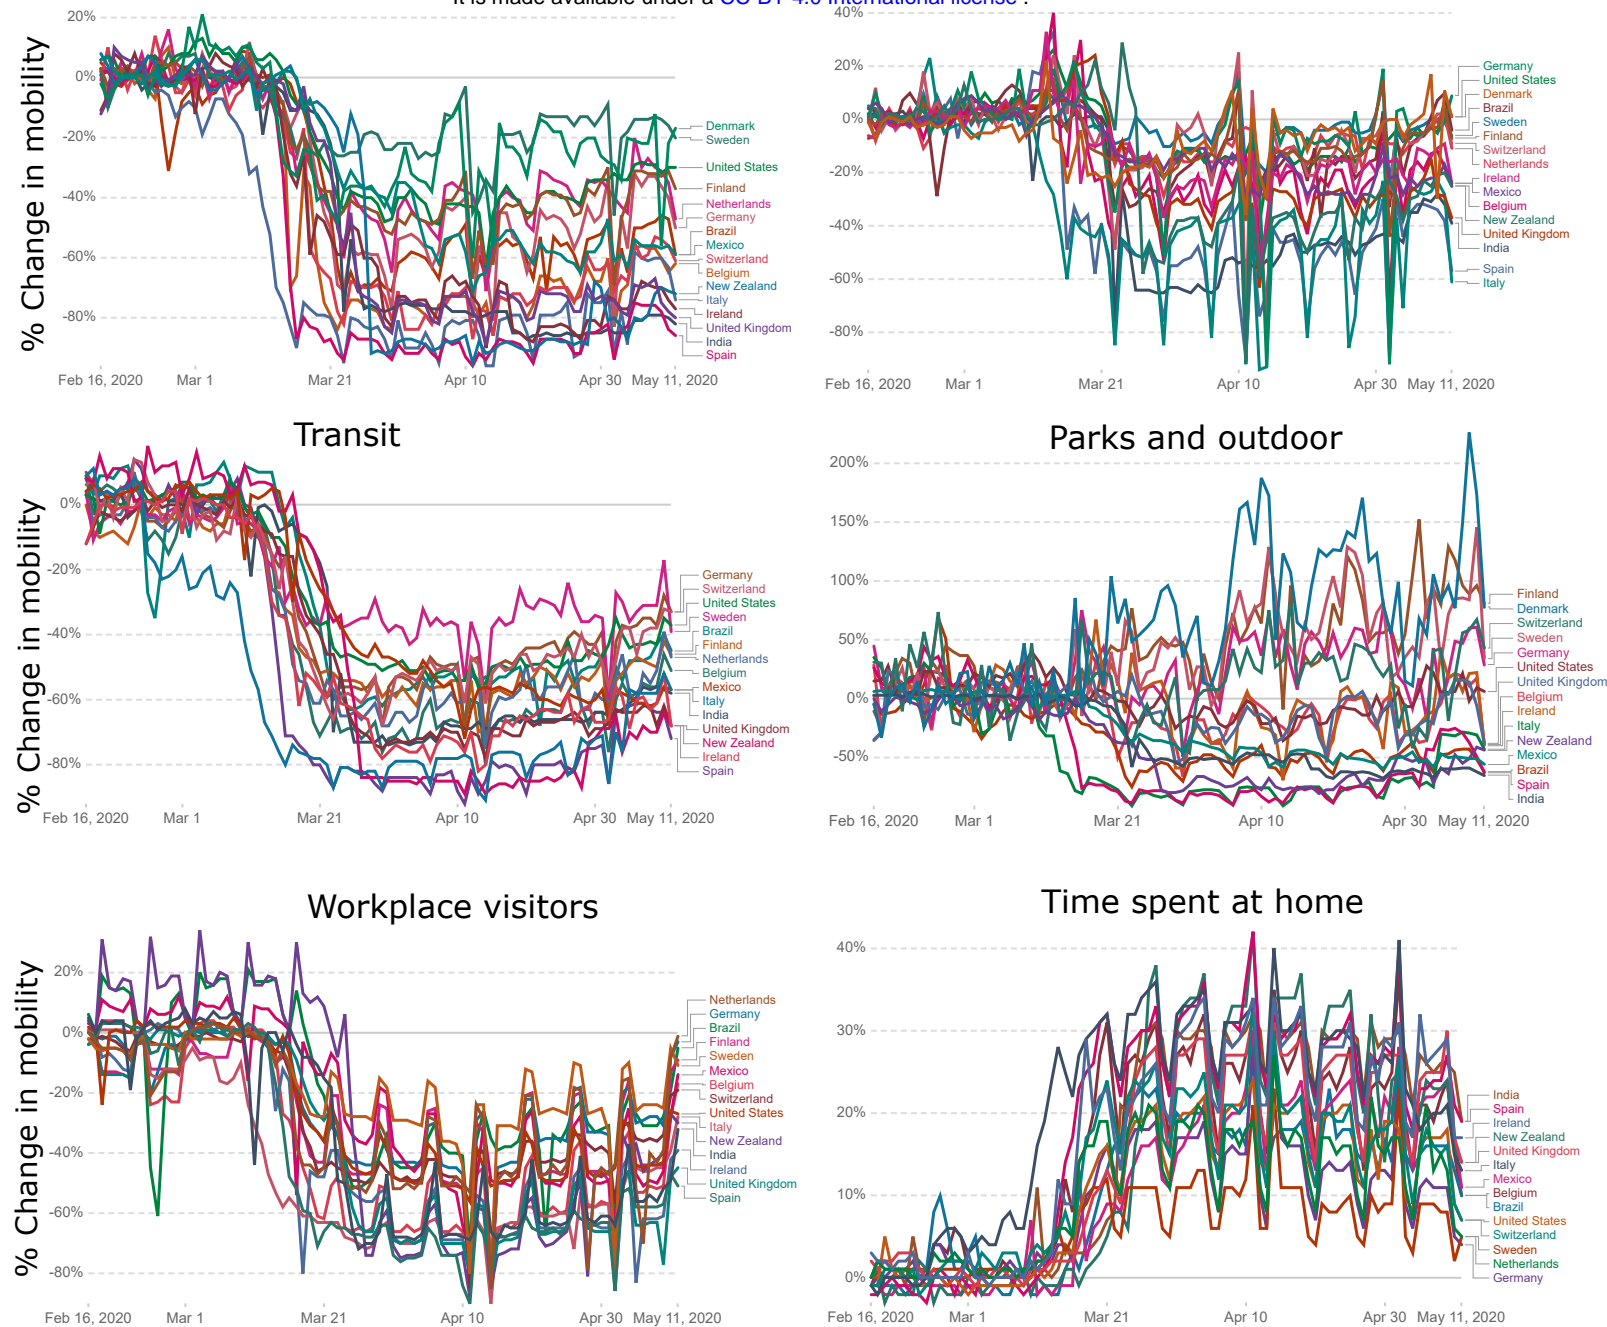

**Fig. S12** Changes in human mobility observed during the lock down period. Six mobility factors, i.e., retail and recreation, grocery and pharmacy, transit, parks and outdoor, workplace visitors, and time spent at home is evaluated in this study.

### Public transport stations

It is made available under a [CC-BY 4.0 International license](https://creativecommons.org/licenses/by/4.0/).

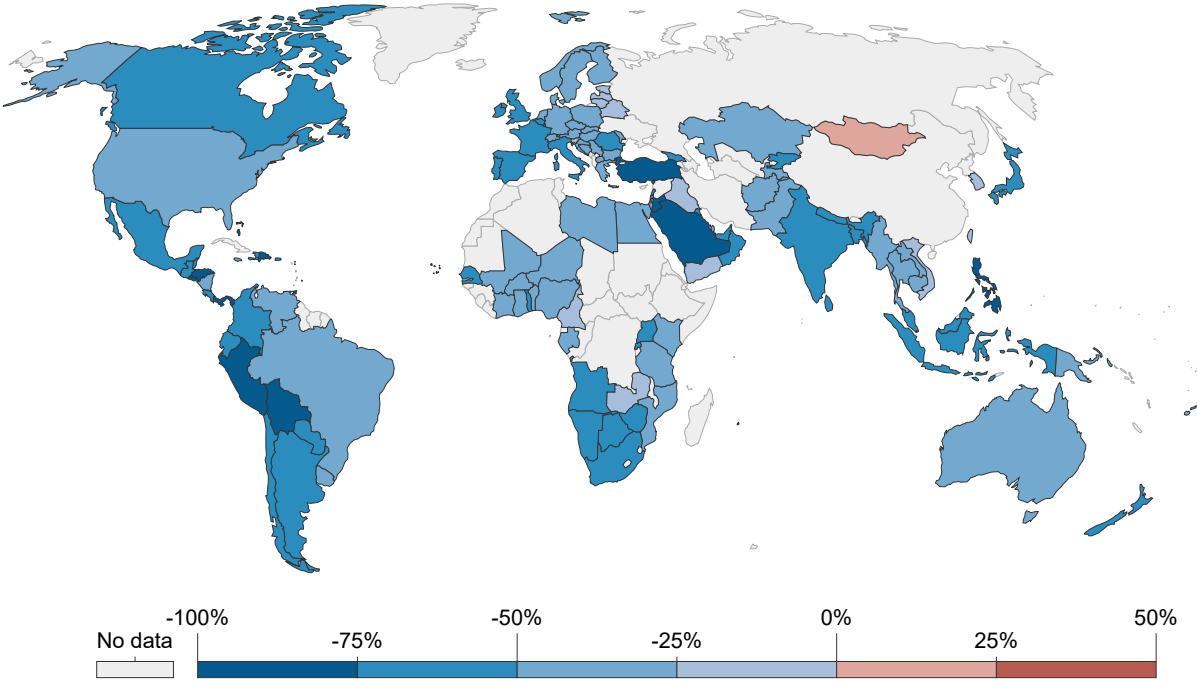

### Parks and outdoor spaces

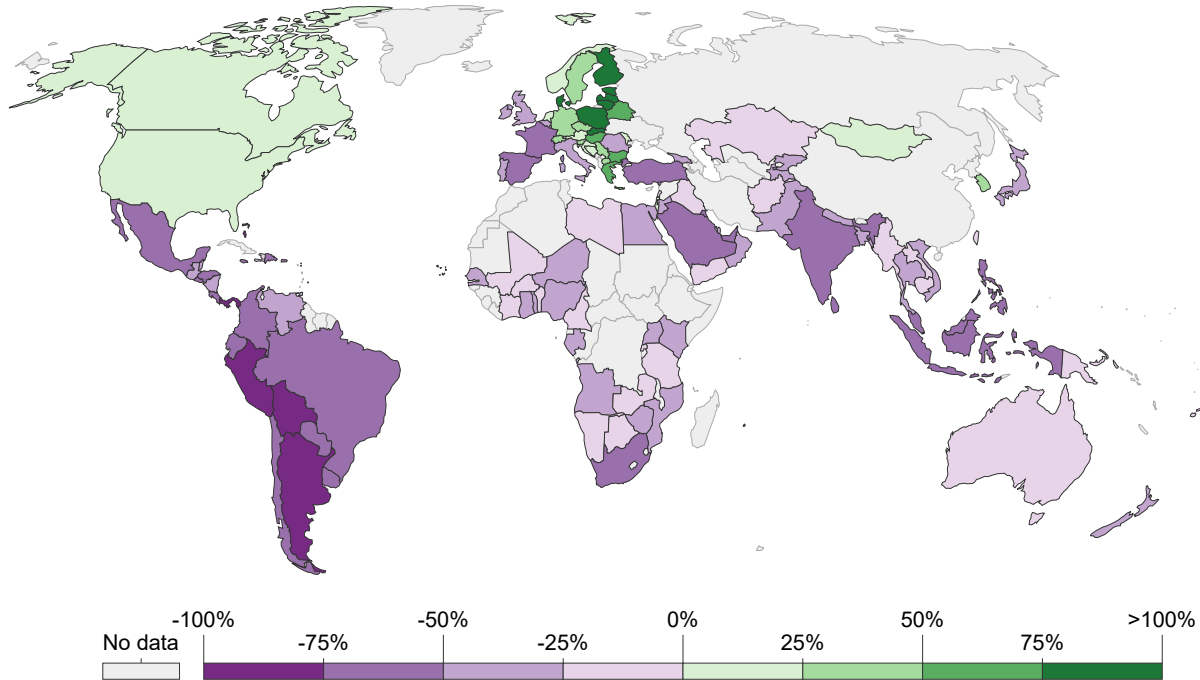

**Fig. S13** Spatial variability of public transport and parks/outdoor mobility during the lockdown period.

### Retail and recreation

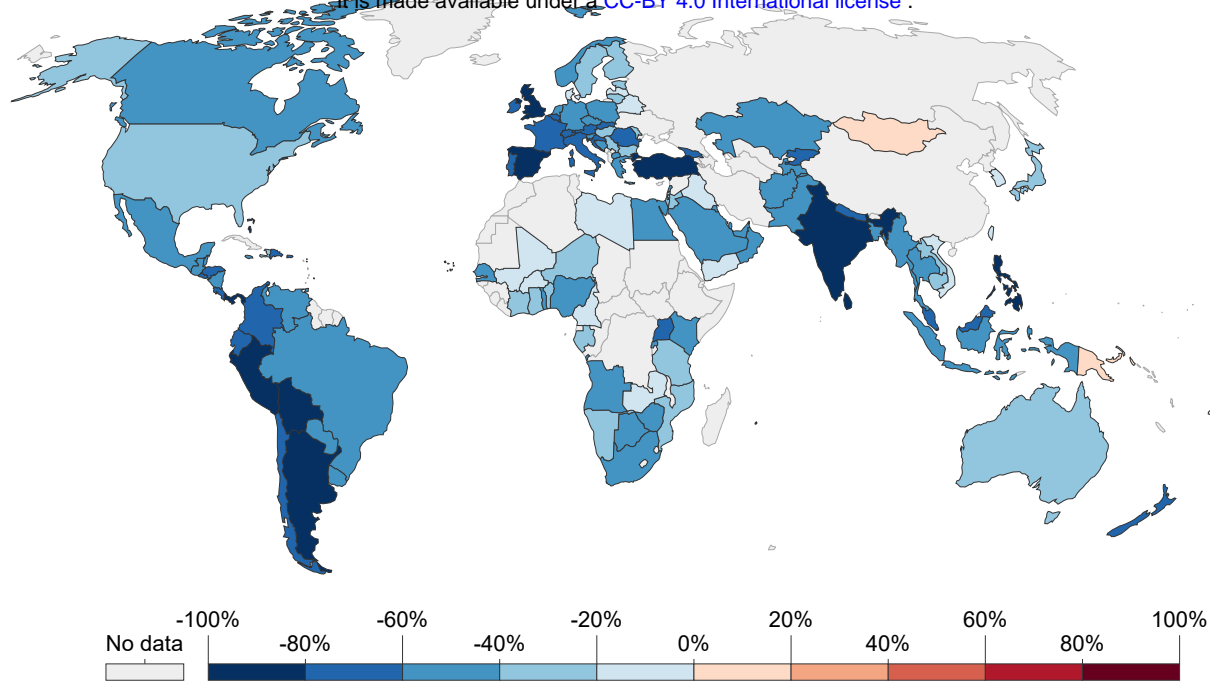

### Grocery and pharmacy stores

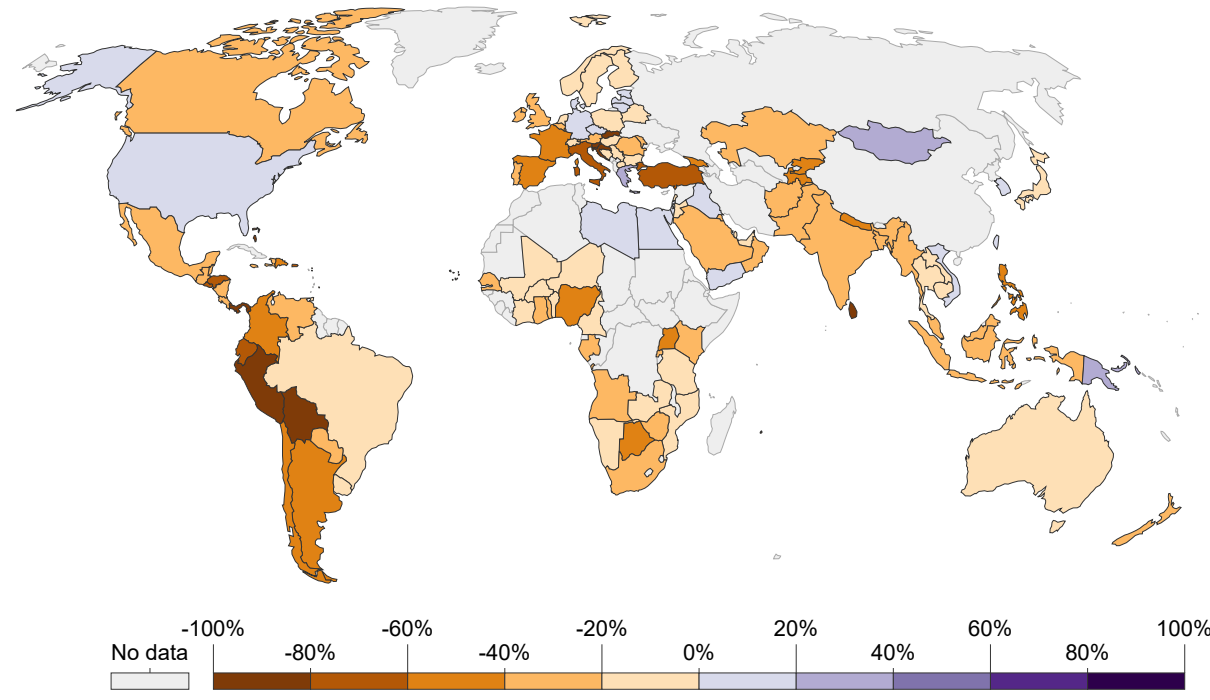

**Fig. S14** Spatial variability of retail/recreation and grocery/pharmacy mobility during the lock-down period.

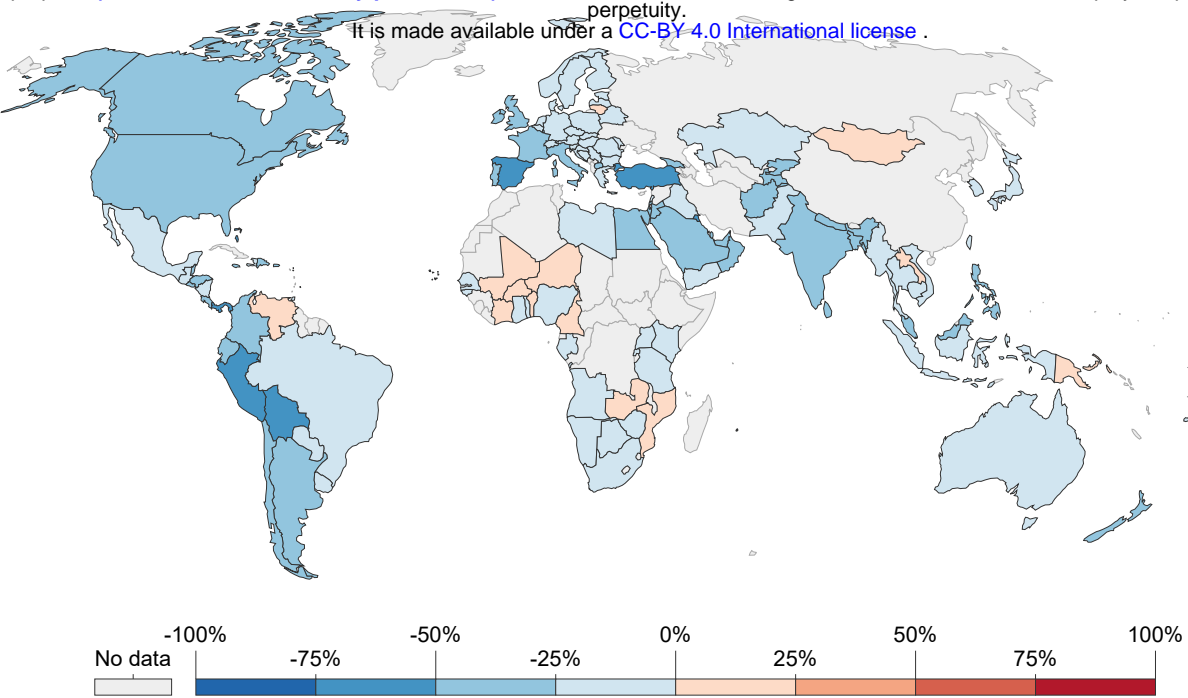

### Time spent at home

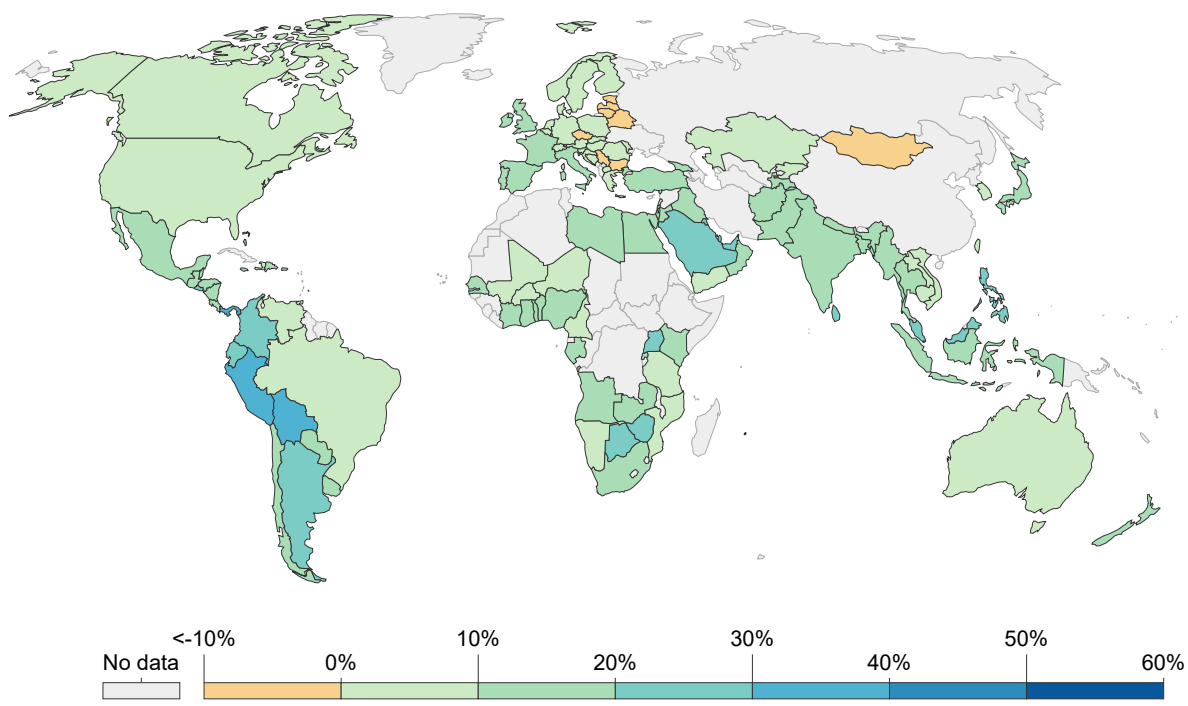

**Fig. S15** Spatial variability of workplace and residential mobility during the lockdown period.

**Table. 1** Summary statistics of mean NO<sub>2</sub>, SO<sub>2</sub>, CO, and Aerosol concentration during 2019 and 2020 (Feb to May).

| City         | NO <sub>2</sub> |        |            | SO <sub>2</sub> |        |            | CO       |          |            | Aerosol |       |            |
|--------------|-----------------|--------|------------|-----------------|--------|------------|----------|----------|------------|---------|-------|------------|
|              | 2019            | 2020   | Difference | 2019            | 2020   | Difference | 2019     | 2020     | Difference | 2019    | 2020  | Difference |
| Antwerp      | 183.46          | 139.18 | -44.28     | 388.11          | 464.75 | 76.64      | 37692.53 | 37163.86 | -528.67    | -0.93   | -1.22 | -0.29      |
| Barcelona    | 175.67          | 123.86 | -51.81     | 429.21          | 444.19 | 14.98      | 36769.83 | 35719.16 | -1050.67   | -0.96   | -1.2  | -0.24      |
| Brussels     | 160.95          | 115.96 | -44.99     | 227.32          | 347.9  | 120.58     | 37139.19 | 37103.17 | -36.02     | -0.95   | -1.23 | -0.28      |
| Chicago      | 199.21          | 139.27 | -59.94     | 528.26          | 785.46 | 257.2      | 38705.92 | 38421.4  | -284.52    | -0.76   | -1.04 | -0.28      |
| Cologne      | 194.25          | 132.53 | -61.72     | 320.4           | 514.36 | 193.96     | 37571.52 | 37756.77 | 185.25     | -0.96   | -1.27 | -0.31      |
| Denver       | 161.01          | 107.19 | -53.82     | 128.75          | 249.18 | 120.43     | 29961.93 | 30538.35 | 576.42     | -0.77   | -0.99 | -0.22      |
| Detroit      | 185.43          | 110.72 | -74.71     | 465.96          | 508.61 | 42.65      | 39559.85 | 37941.21 | -1618.64   | -0.91   | -1.11 | -0.2       |
| Frankfurt    | 187.38          | 119.25 | -68.13     | 401.17          | 437.41 | 36.24      | 37875.36 | 37597.53 | -277.83    | -0.98   | -1.29 | -0.31      |
| London       | 172.1           | 113.32 | -58.78     | 415.89          | 461.82 | 45.93      | 37370.07 | 36965.12 | -404.95    | -0.94   | -1.22 | -0.28      |
| Los Angeles  | 177.45          | 158.74 | -18.71     | 264.3           | 397.61 | 133.31     | 38555.63 | 38140.47 | -415.16    | -0.7    | -0.99 | -0.29      |
| Madrid       | 186.24          | 122.86 | -63.38     | 276.41          | 348.12 | 71.71      | 32831.26 | 32377.51 | -453.75    | -0.77   | -1.12 | -0.35      |
| Milan        | 257.34          | 162.52 | -94.82     | 361.54          | 414.17 | 52.63      | 38548.29 | 37325.44 | -1222.85   | -0.92   | -1.28 | -0.36      |
| New York     | 242.2           | 172.31 | -69.89     | 382.49          | 602.49 | 220        | 40985.22 | 39246.91 | -1738.31   | -0.95   | -1.15 | -0.2       |
| Paris        | 205.95          | 111.33 | -94.62     | 427.99          | 484.62 | 56.63      | 37984.51 | 37060.08 | -924.43    | -0.85   | -1.09 | -0.24      |
| Philadelphia | 187.81          | 123.11 | -64.7      | 422.32          | 552.96 | 130.64     | 40035.09 | 38654.45 | -1380.64   | -0.93   | -1.15 | -0.22      |
| Rotterdam    | 166.64          | 122.11 | -44.53     | 363.43          | 311.56 | -51.87     | 37520.03 | 37524.14 | 4.11       | -0.93   | -1.18 | -0.25      |
| Sao Paulo    | 119.88          | 99.3   | -20.58     | 19.34           | 105.23 | 85.89      | 26755.54 | 25716.73 | -1038.81   | -1.07   | -1.28 | -0.21      |
| Tehran       | 747.1           | 563.77 | -183.33    | 258.35          | 258.3  | -0.05      | 38460.98 | 37850.83 | -610.15    | -1.04   | -1.3  | -0.26      |
| Turin        | 204.94          | 129.46 | -75.48     | 322.5           | 548.34 | 225.84     | 37338.8  | 36357.31 | -981.49    | -1.05   | -1.4  | -0.35      |
| Utrecht      | 161.5           | 107.07 | -54.43     | 352.77          | 520.7  | 167.93     | 37702.9  | 37553.67 | -149.23    | -0.92   | -1.3  | -0.38      |



**Table. 2** Concentration (ton) of different air pollutants in 2019 and 2020 derived from Sentinel TROPOMI satellite data.

| City         | NO <sub>2</sub> |       |                | SO <sub>2</sub> |       |                | CO      |         |                |
|--------------|-----------------|-------|----------------|-----------------|-------|----------------|---------|---------|----------------|
|              | 2019            | 2020  | Difference (%) | 2019            | 2020  | Difference (%) | 2019    | 2020    | Difference (%) |
| Antwerp      | 1.73            | 1.31  | -24.14         | 5.08            | 6.09  | 19.75          | 215.83  | 212.80  | -1.40          |
| Barcelona    | 0.82            | 0.58  | -29.49         | 2.80            | 2.90  | 3.49           | 104.91  | 101.91  | -2.86          |
| Brussels     | 1.20            | 0.86  | -27.95         | 2.35            | 3.60  | 53.04          | 167.84  | 167.68  | -0.10          |
| Chicago      | 5.55            | 3.88  | -30.09         | 20.51           | 30.50 | 48.69          | 656.87  | 652.04  | -0.74          |
| Cologne      | 3.62            | 2.47  | -31.77         | 8.32            | 13.35 | 60.54          | 426.27  | 428.37  | 0.49           |
| Denver       | 2.97            | 1.98  | -33.43         | 3.31            | 6.40  | 93.54          | 336.58  | 343.06  | 1.92           |
| Detroit      | 3.16            | 1.89  | -40.29         | 11.05           | 12.06 | 9.15           | 409.95  | 393.18  | -4.09          |
| Frankfurt    | 2.14            | 1.36  | -36.36         | 6.38            | 6.96  | 9.03           | 263.32  | 261.39  | -0.73          |
| London       | 12.45           | 8.20  | -34.15         | 41.88           | 46.51 | 11.04          | 1644.88 | 1627.06 | -1.08          |
| Los Angeles  | 10.63           | 9.51  | -10.54         | 22.05           | 33.17 | 50.44          | 1405.58 | 1390.45 | -1.08          |
| Madrid       | 5.18            | 3.42  | -34.03         | 10.70           | 13.48 | 25.94          | 555.52  | 547.84  | -1.38          |
| Milan        | 2.15            | 1.36  | -36.85         | 4.21            | 4.82  | 14.56          | 196.23  | 190.00  | -3.17          |
| New York     | 8.73            | 6.21  | -28.86         | 19.21           | 30.25 | 57.52          | 899.48  | 861.33  | -4.24          |
| Paris        | 1.00            | 0.54  | -45.94         | 2.89            | 3.27  | 13.23          | 112.10  | 109.37  | -2.43          |
| Philadelphia | 3.17            | 2.08  | -34.45         | 9.93            | 13.00 | 30.93          | 411.40  | 397.21  | -3.45          |
| Rotterdam    | 2.50            | 1.83  | -26.72         | 7.59            | 6.50  | -14.27         | 342.27  | 342.31  | 0.01           |
| Sao Paulo    | 8.39            | 6.95  | -17.17         | 1.88            | 10.25 | 444.11         | 1139.46 | 1095.22 | -3.88          |
| Tehran       | 25.09           | 18.93 | -24.54         | 12.08           | 12.08 | -0.02          | 786.14  | 773.67  | -1.59          |
| Turin        | 1.23            | 0.78  | -36.83         | 2.69            | 4.57  | 70.03          | 136.12  | 132.54  | -2.63          |
| Utrecht      | 0.74            | 0.49  | -33.70         | 2.24            | 3.31  | 47.60          | 104.73  | 104.32  | -0.40          |

**Table. 3** Per unit ecosystem service equivalent value of different pollutants.

| <b>Pollutants</b>      | <b>Min</b> | <b>Median</b> | <b>Mean</b> | <b>Max</b>  |
|------------------------|------------|---------------|-------------|-------------|
| <b>CO</b>              | \$1.84     | \$956.17      | \$956.17    | \$1,930.72  |
| <b>NO<sub>x</sub></b>  | \$404.53   | \$1,949.11    | \$5,148.58  | \$17,468.41 |
| <b>SO<sub>2</sub></b>  | \$1,415.86 | \$3,309.80    | \$3,677.56  | \$8,642.27  |
| <b>PM<sub>10</sub></b> | \$1,746.84 | \$5,148.58    | \$7,906.76  | \$29,788.24 |

**Table. 4** Economic benefits due to the reduction of anthropogenic emission estimated for different cities estimated using median externality valuation method.

| <b>City</b>  | <b>NO<sub>2</sub></b> | <b>CO</b>        | <b>Overall</b>   |
|--------------|-----------------------|------------------|------------------|
|              | <b>ESV (USD)</b>      | <b>ESV (USD)</b> | <b>ESV (USD)</b> |
| Antwerp      | 2145                  | 2894             | 5039             |
| Barcelona    | 1251                  | 2866             | 4117             |
| Brussels     | 1720                  | 156              | 1876             |
| Chicago      | 8605                  | 4617             | 13222            |
| Cologne      | 5924                  | -2010            | 3914             |
| Denver       | 5114                  | -6191            | -1077            |
| Detroit      | 6549                  | 16038            | 22588            |
| Frankfurt    | 4007                  | 1847             | 5854             |
| London       | 21887                 | 17043            | 38930            |
| Los Angeles  | 5770                  | 14472            | 20242            |
| Madrid       | 9072                  | 7341             | 16413            |
| Milan        | 4083                  | 5952             | 10035            |
| New York     | 12975                 | 36478            | 49453            |
| Paris        | 2362                  | 2609             | 4971             |
| Philadelphia | 5624                  | 13566            | 19190            |
| Rotterdam    | 3436                  | -36              | 3401             |
| Sao Paulo    | 7414                  | 42302            | 49716            |
| Tehran       | 31700                 | 11925            | 43624            |
| Turin        | 2328                  | 3421             | 5749             |
| Utrecht      | 1279                  | 396              | 1675             |

**Table. 5** Summary estimates of economic benefits (Million US\$) derived from health burden approach. EB = Economic Burden (Million US\$)

| <b>City</b>  | <b>EB 2019</b> | <b>EB 2020</b> | <b>Economic Benefit</b> |
|--------------|----------------|----------------|-------------------------|
| Antwerp      | 67             | 51             | 16                      |
| Barcelona    | 138            | 97             | 41                      |
| Brussels     | 31             | 22             | 9                       |
| Chicago      | 456            | 320            | 137                     |
| Cologne      | 213            | 145            | 67                      |
| Denver       | 89             | 59             | 30                      |
| Detroit      | 106            | 64             | 43                      |
| Frankfurt    | 144            | 92             | 52                      |
| London       | 1102           | 727            | 375                     |
| Los Angeles  | 634            | 568            | 67                      |
| Madrid       | 267            | 176            | 90                      |
| Milan        | 211            | 134            | 78                      |
| New York     | 1744           | 1243           | 501                     |
| Paris        | 270            | 146            | 124                     |
| Philadelphia | 258            | 169            | 89                      |
| Rotterdam    | 35             | 26             | 9                       |
| Sao Paulo    | 234            | 194            | 40                      |
| Tehran       | 152            | 115            | 37                      |
| Turin        | 123            | 78             | 45                      |
| Utrecht      | 41             | 27             | 14                      |

**Table. S1** AQI categorization for different air pollutants.

| AQI       | NO <sub>2</sub><br>(ppb) | CO<br>(ppm) | O <sub>3</sub><br>(ppm/hr) | PM <sub>10</sub><br>(µg m <sup>-3</sup> ) | PM <sub>2.5</sub><br>(µg m <sup>-3</sup> ) | SO <sub>2</sub><br>(ppb) |
|-----------|--------------------------|-------------|----------------------------|-------------------------------------------|--------------------------------------------|--------------------------|
| Good      | <=53                     | <=4.4       | <=0.054                    | <=54                                      | <=12                                       | <=35                     |
| Moderate  | 54-100                   | 4.5-9.4     | 0.055-0.070                | 55-154                                    | 12.1-35.4                                  | 36-75                    |
| Unhealthy | 101-360                  | 9.5-12.4    | 0.071-0.085                | 155-254                                   | 35.5-55.4                                  | 76-185                   |
| Unhealthy | 361-649                  | 12.5-15.4   | 0.086-0.105                | 255-354                                   | 55.5-150.4                                 | 186-304                  |
| Very      | 650-1,249                | 15.5-30.4   | 0.106-0.200                | 355-424                                   | 150.5-250.4                                | 305-604                  |
| Hazardous | >=1,250                  | >=30.5      | >=0.405                    | >=425                                     | >=250.5                                    | >=605                    |

**Table. S2** Change statistics of NO<sub>2</sub> during the study period (Feb 1 to May 11). Minus and plus signs are indicating reduction and increases of NO<sub>2</sub>.

| Country         | $\Delta$ NO <sub>2</sub> | Country                 | $\Delta$ NO <sub>2</sub> |
|-----------------|--------------------------|-------------------------|--------------------------|
| Netherlands     | -70.29                   | Kiribati                | 213.30                   |
| Japan           | -63.99                   | Howland Island          | 135.82                   |
| Macau           | -59.68                   | Jarvis Island           | 128.79                   |
| Man, Isle of    | -57.54                   | Nauru                   | 93.02                    |
| Lebanon         | -54.75                   | Pacific Islands (Palau) | 80.82                    |
| Italy           | -54.41                   | Indonesia               | 74.39                    |
| India           | -53.68                   | Nepal                   | 56.72                    |
| Monaco          | -53.63                   | Mozambique              | 56.19                    |
| North Korea     | -50.84                   | Norfolk Island          | 54.61                    |
| Hungary         | -50.49                   | Jan Mayen               | 52.15                    |
| Kuwait          | -49.97                   | Mayotte                 | 48.85                    |
| Pakistan        | -42.58                   | New Caledonia           | 41.76                    |
| Kazakhstan      | -41.84                   | Papua New Guinea        | 40.68                    |
| Oman            | -41.42                   | Iceland                 | 37.63                    |
| Jordan          | -40.51                   | Juan De Nova Island     | 37.59                    |
| Macedonia       | -37.29                   | Niue                    | 29.18                    |
| Namibia         | -35.05                   | Mali                    | 28.36                    |
| Liechtenstein   | -33.81                   | Latvia                  | 28.05                    |
| Morocco         | -33.57                   | Midway Islands          | 25.03                    |
| Myanmar (Burma) | -32.59                   | Maldives                | 22.78                    |
| Nigeria         | -32.39                   | Libya                   | 21.53                    |
| Montenegro      | -31.59                   | Ireland                 | 17.43                    |
| Singapore       | -29.89                   | Kyrgyzstan              | 16.11                    |
| Germany         | -29.82                   | Montserrat              | 15.18                    |
| Denmark         | -29.35                   | Marshall Islands        | 14.28                    |
| Panama          | -27.38                   | Liberia                 | 13.72                    |
| Laos            | -27.14                   | Paraguay                | 9.26                     |
| Iraq            | -26.96                   | Uruguay                 | 8.80                     |
| New Zealand     | -26.94                   | Niger                   | 8.67                     |
| Jersey          | -26.14                   | Pitcairn Islands        | 8.42                     |

**Table. S3** Change statistics of CO during the study period (Feb 1 to May 11).  
Minus and plus signs are indicating reduction and increases of CO.

| <b>Country</b>          | <b>ΔCO</b> | <b>Country</b>                    | <b>ΔCO</b> |
|-------------------------|------------|-----------------------------------|------------|
| Ecuador                 | -6.40      | Sao Tome and Principe             | 13.86      |
| Colombia                | -5.90      | Equatorial Guinea                 | 13.68      |
| Venezuela               | -4.32      | South Georgia                     | 13.53      |
| Macau                   | -4.09      | Gabon                             | 13.27      |
| South Korea             | -3.71      | Argentina                         | 13.05      |
| North Korea             | -3.70      | Falkland Islands (Islas Malvinas) | 12.64      |
| Byelarus                | -3.27      | Uruguay                           | 12.15      |
| Singapore               | -3.10      | Congo                             | 11.88      |
| Estonia                 | -3.06      | Bouvet Island                     | 11.36      |
| Latvia                  | -2.93      | Heard Island & McDonald Islands   | 11.25      |
| Malta                   | -2.84      | Cameroon                          | 10.56      |
| Lithuania               | -2.77      | Honduras                          | 9.70       |
| Aruba                   | -2.74      | French Southern & Antarctic Lands | 9.53       |
| Man, Isle of            | -2.57      | Guatemala                         | 9.30       |
| Nepal                   | -2.53      | Zaire                             | 9.22       |
| Armenia                 | -2.46      | Thailand                          | 9.04       |
| Portugal                | -2.30      | Zambia                            | 8.66       |
| Tunisia                 | -2.22      | Angola                            | 8.57       |
| Jersey                  | -2.21      | Zimbabwe                          | 8.53       |
| Andorra                 | -2.20      | Chile                             | 8.39       |
| Japan                   | -2.15      | Glorioso Islands                  | 8.39       |
| St. Pierre and Miquelon | -2.07      | Norfolk Island                    | 8.08       |
| Finland                 | -2.06      | New Zealand                       | 7.94       |
| Syria                   | -2.05      | Myanmar (Burma)                   | 7.81       |
| Spain                   | -2.03      | Belize                            | 7.80       |
| Sierra Leone            | -1.99      | Reunion                           | 7.64       |
| Norway                  | -1.98      | Mauritius                         | 7.35       |
| Poland                  | -1.98      | Central African Republic          | 7.22       |
| Jan Mayen               | -1.91      | Guadeloupe                        | 6.98       |
| Iraq                    | -1.85      | Laos                              | 6.93       |

**Table. S4** Summary statistics of relative risk (RR) and attributable fraction (AF) in 2019 and 2020.

| City         | RR 2019   | RR 2020   | AF 2019  | AF 2020  |
|--------------|-----------|-----------|----------|----------|
| Antwerp      | 1.0047644 | 1.0036144 | 0.004742 | 0.003601 |
| Barcelona    | 1.0045621 | 1.0032165 | 0.004541 | 0.003206 |
| Brussels     | 1.0041798 | 1.0030114 | 0.004162 | 0.003002 |
| Chicago      | 1.0051734 | 1.0036168 | 0.005147 | 0.003604 |
| Cologne      | 1.0050446 | 1.0034417 | 0.005019 | 0.003430 |
| Denver       | 1.0041814 | 1.0027837 | 0.004164 | 0.002776 |
| Detroit      | 1.0048155 | 1.0028753 | 0.004792 | 0.002867 |
| Frankfurt    | 1.0048662 | 1.0030969 | 0.004843 | 0.003087 |
| London       | 1.0044694 | 1.0029429 | 0.004449 | 0.002934 |
| Los Angeles  | 1.0046083 | 1.0041224 | 0.004587 | 0.004105 |
| Madrid       | 1.0048366 | 1.0031906 | 0.004813 | 0.003180 |
| Milan        | 1.006683  | 1.0042206 | 0.006639 | 0.00420  |
| New York     | 1.0062898 | 1.0044748 | 0.006251 | 0.004455 |
| Paris        | 1.0053484 | 1.0028911 | 0.00532  | 0.002883 |
| Philadelphia | 1.0048773 | 1.0031971 | 0.004854 | 0.003187 |
| Rotterdam    | 1.0043276 | 1.0031711 | 0.004309 | 0.003161 |
| Sao Paulo    | 1.0031132 | 1.0025788 | 0.003104 | 0.002572 |
| Tehran       | 1.0194018 | 1.0146408 | 0.019033 | 0.014430 |
| Turin        | 1.0053222 | 1.0033620 | 0.005294 | 0.003351 |
| Utrecht      | 1.0041941 | 1.0027806 | 0.004177 | 0.002773 |

**Table. S5** Summary statistics of health burden and economic burden of 20 major cities. CV HB = Cardiovascular health burden, CRD GB = Chronic respiratory disease health burden, THB = total health burden, VSL = value of statistical life (million US\$), EB = economic burden (million US\$).

| City         | CV HB<br>2019 | CRD HB<br>2019 | THB<br>2019 | CV HB<br>2020 | CRD HB<br>2020 | THB<br>2020 | VSL | EB<br>2019 | EB<br>2020 |
|--------------|---------------|----------------|-------------|---------------|----------------|-------------|-----|------------|------------|
| Antwerp      | 7             | 1              | 8           | 5             | 1              | 6           | 8   | 67         | 51         |
| Barcelona    | 21            | 6              | 27          | 15            | 4              | 19          | 5   | 138        | 97         |
| Brussels     | 3             | 1              | 4           | 2             | 0              | 3           | 8   | 31         | 22         |
| Chicago      | 37            | 8              | 45          | 26            | 6              | 31          | 10  | 456        | 320        |
| Cologne      | 22            | 3              | 25          | 15            | 2              | 17          | 8   | 213        | 145        |
| Denver       | 7             | 2              | 9           | 5             | 1              | 6           | 10  | 89         | 59         |
| Detroit      | 9             | 2              | 10          | 5             | 1              | 6           | 10  | 106        | 64         |
| Frankfurt    | 15            | 2              | 17          | 10            | 1              | 11          | 8   | 144        | 92         |
| London       | 110           | 29             | 139         | 72            | 19             | 92          | 8   | 1102       | 727        |
| Los Angeles  | 51            | 11             | 62          | 46            | 10             | 56          | 10  | 634        | 568        |
| Madrid       | 40            | 11             | 51          | 27            | 7              | 34          | 5   | 267        | 176        |
| Milan        | 31            | 4              | 35          | 20            | 3              | 22          | 6   | 211        | 134        |
| New York     | 140           | 31             | 171         | 100           | 22             | 122         | 10  | 1744       | 1243       |
| Paris        | 32            | 4              | 36          | 17            | 2              | 20          | 7   | 270        | 146        |
| Philadelphia | 21            | 5              | 25          | 14            | 3              | 17          | 10  | 258        | 169        |
| Rotterdam    | 3             | 1              | 4           | 2             | 1              | 3           | 9   | 35         | 26         |
| Sao Paulo    | 103           | 28             | 130         | 85            | 23             | 108         | 2   | 234        | 194        |
| Tehran       | 117           | 11             | 127         | 88            | 8              | 97          | 1   | 152        | 115        |
| Turin        | 18            | 2              | 20          | 11            | 2              | 13          | 6   | 123        | 78         |
| Utrecht      | 4             | 1              | 5           | 2             | 1              | 3           | 9   | 41         | 27         |



**Table. S6** Changes in human mobility (%) from the baseline (mobility on 13<sup>th</sup> January) during the lockdown period (1<sup>st</sup> February to 11<sup>th</sup> May 2020).

| City         | Jan (From 13 <sup>th</sup> ) |         | Feb     |         | Mar     |         | April   |         | May (up to 11) |         |
|--------------|------------------------------|---------|---------|---------|---------|---------|---------|---------|----------------|---------|
|              | Driving                      | Transit | Driving | Transit | Driving | Transit | Driving | Transit | Driving        | Transit |
| Antwerp      | 14.00                        | 4.39    | 20.80   | 23.94   | -31.05  | -35.98  | -58.79  | -75.84  | -47.34         | -66.90  |
| Barcelona    | 8.60                         | 4.47    | 18.15   | 63.81   | -44.91  | 4.86    | -85.04  | -88.10  | -74.71         | -79.85  |
| Brussels     | 9.49                         | 14.53   | 15.07   | 32.10   | -37.64  | -39.03  | -65.32  | -81.19  | -52.91         | -73.32  |
| Chicago      | 5.61                         | -0.53   | 12.73   | 4.47    | -18.38  | -39.60  | -41.98  | -77.76  | -23.97         | -74.56  |
| Cologne      | -4.19                        | -4.63   | -1.08   | 43.30   | -37.46  | -17.98  | -51.98  | -55.32  | -35.83         | -50.94  |
| Denver       | 5.34                         | -1.19   | 6.72    | 0.61    | -24.10  | -36.10  | -48.45  | -70.08  | -28.47         | -64.71  |
| Frankfurt    | 4.28                         | -----   | 5.72    | -----   | -30.92  | -----   | -44.89  | -----   | -32.83         | -----   |
| London       | 10.85                        | 11.89   | 14.61   | 17.76   | -26.71  | -38.02  | -67.16  | -86.27  | -60.17         | -82.80  |
| Los Angeles  | 12.41                        | 3.30    | 17.30   | 7.81    | -22.80  | -39.09  | -51.15  | -76.52  | -34.31         | -72.70  |
| Madrid       | 9.60                         | 9.69    | 16.22   | 14.44   | -52.45  | -58.34  | -84.25  | -93.47  | -72.18         | -88.56  |
| Milan        | -----                        | 9.96    | -----   | 6.19    | -----   | -70.30  | -----   | -82.30  | -----          | -65.81  |
| New York     | 4.17                         | -2.28   | 8.47    | 1.30    | -26.78  | -48.74  | -54.87  | -86.43  | -38.78         | -83.47  |
| Paris        | -8.05                        | 0.83    | -15.30  | 11.26   | -57.52  | -49.32  | -82.96  | -89.61  | -75.31         | -83.91  |
| Philadelphia | 4.19                         | -6.64   | 9.98    | -4.16   | -20.88  | -38.65  | -43.17  | -71.29  | -23.61         | -69.32  |
| Rotterdam    | 6.34                         | 4.90    | 4.70    | 8.20    | -30.60  | -40.12  | -44.29  | -67.66  | -33.26         | -61.54  |
| Sao Paulo    | 4.51                         | -0.97   | 12.51   | 4.88    | -28.66  | -35.99  | -61.68  | -81.04  | -57.29         | -80.84  |
| Utrecht      | 0.44                         | -1.09   | -0.58   | 6.40    | -35.94  | -45.48  | -51.19  | -72.12  | -41.26         | -66.09  |
